# Supplementary material for: One-pot odourless synthesis of thioesters via in situ generation of thiobenzoic acids using benzoic anhydrides and thiourea
Source: publisher site journal article supplement (doi:10.3762/bjoc.11.141), 2015-07-28
Supplement: Additional file 2 [file 1860-5397-11-141-S2.pdf]

## Supporting Information

for

# One-pot odourless synthesis of thioesters via in situ generation of thiobenzoic acids using benzoic anhydrides and thiourea

Mohammad Abbasi\*<sup>1</sup> and Reza Khalifeh<sup>2</sup>

Address: <sup>1</sup>Chemistry Department, Faculty of Sciences, Persian Gulf University, Bushehr 75169, Iran and <sup>2</sup>Department of Chemistry, Shiraz University of Technology, Shiraz, Iran

Email: Mohammad Abbasi - [abbassi@pgu.ac.ir](mailto:abbassi@pgu.ac.ir)

\* Corresponding author

## NMR spectra

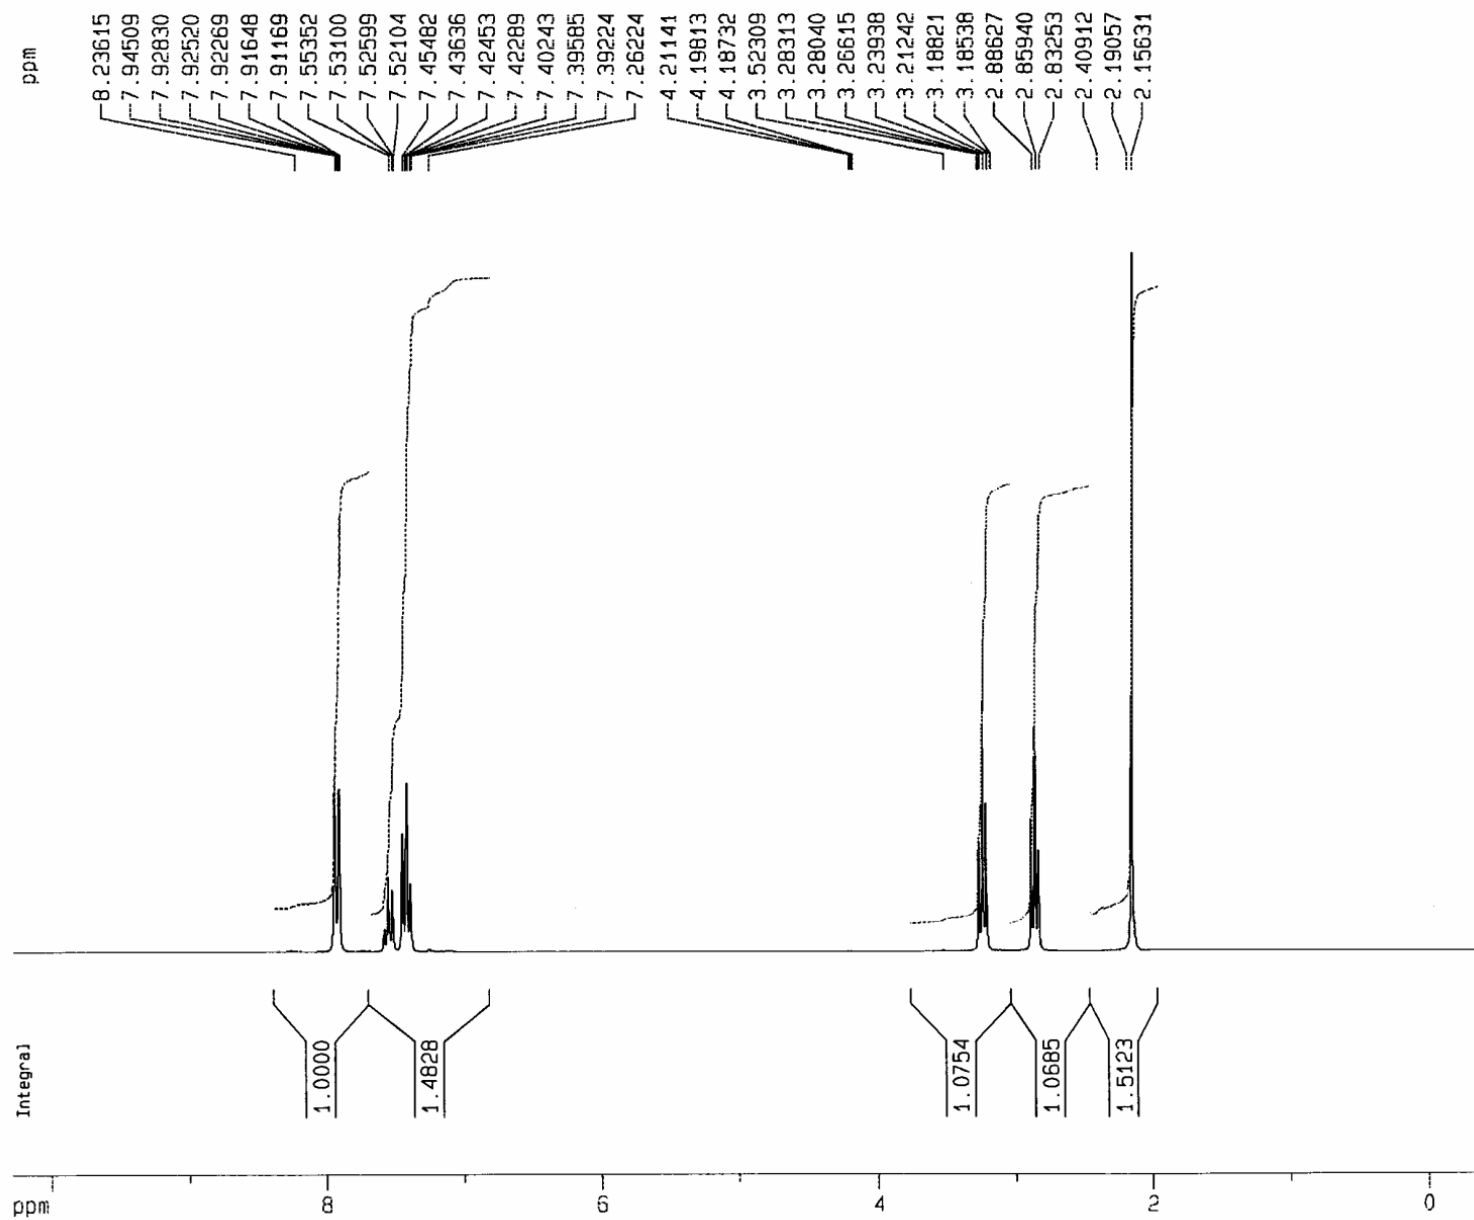

<sup>1</sup>H NMR spectrum of (1) CC(=O)CCSC(=O)c1ccc(cc1)

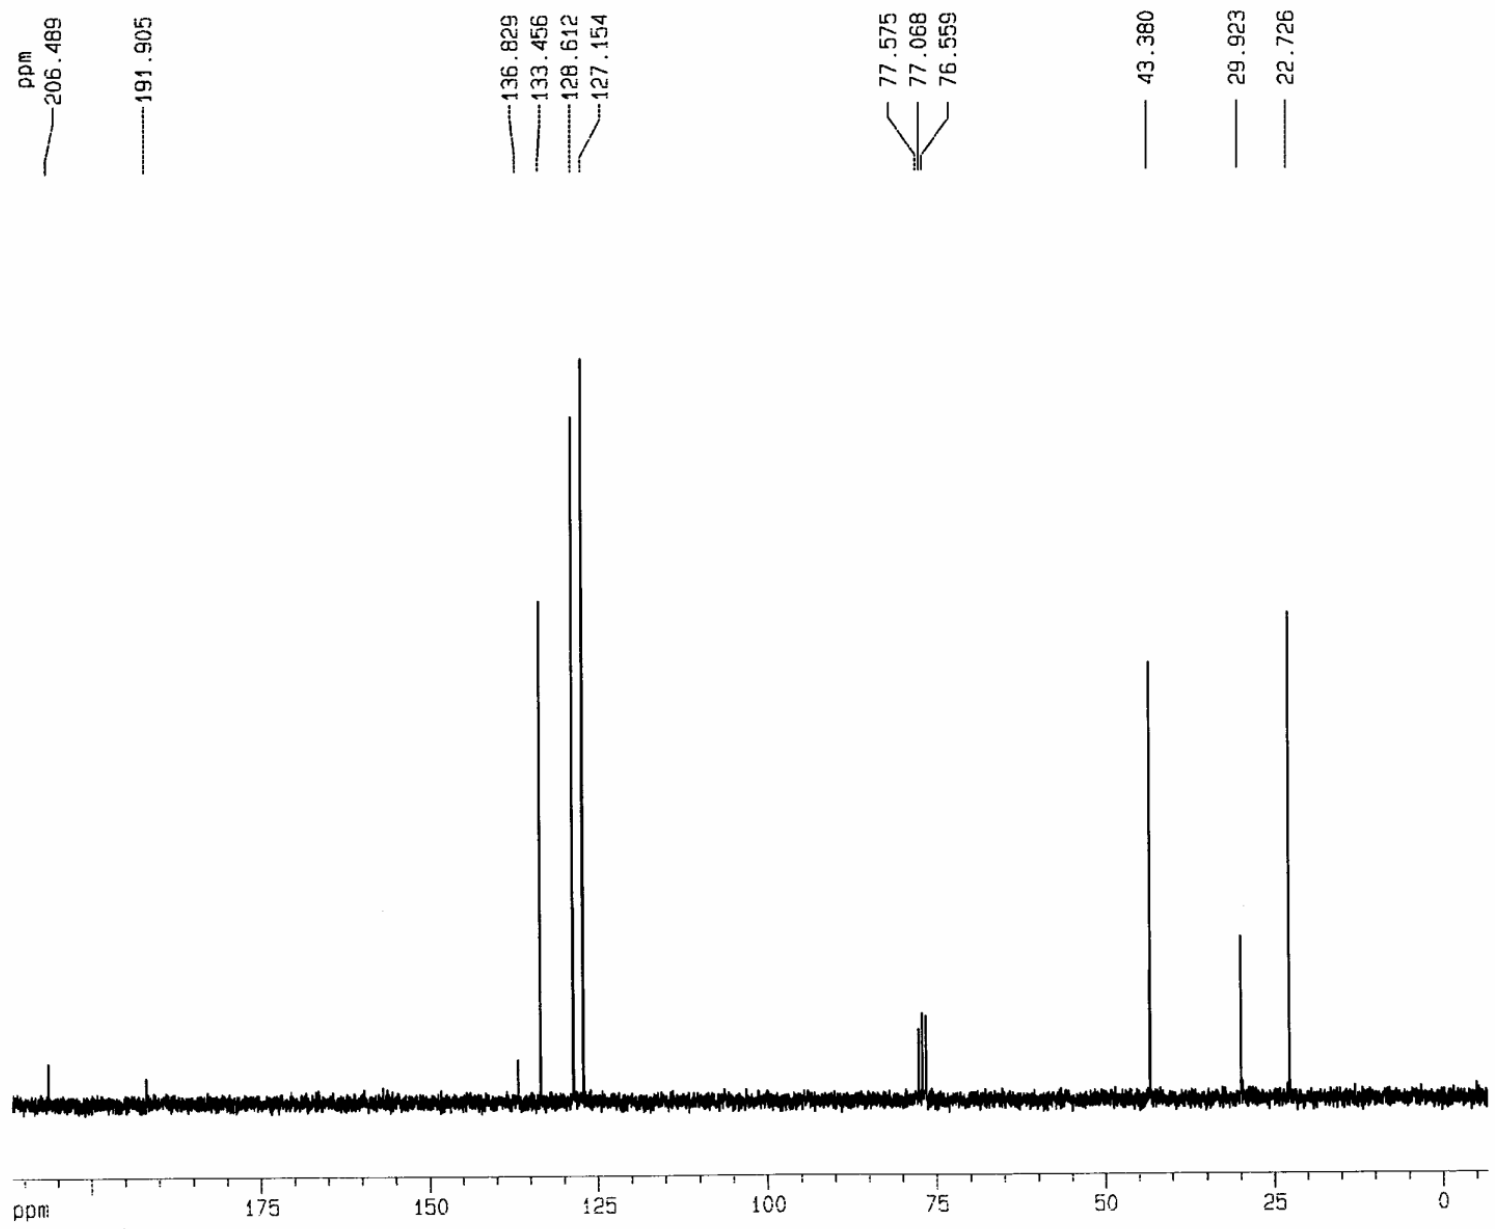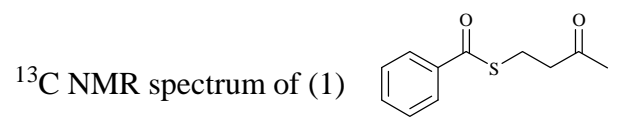

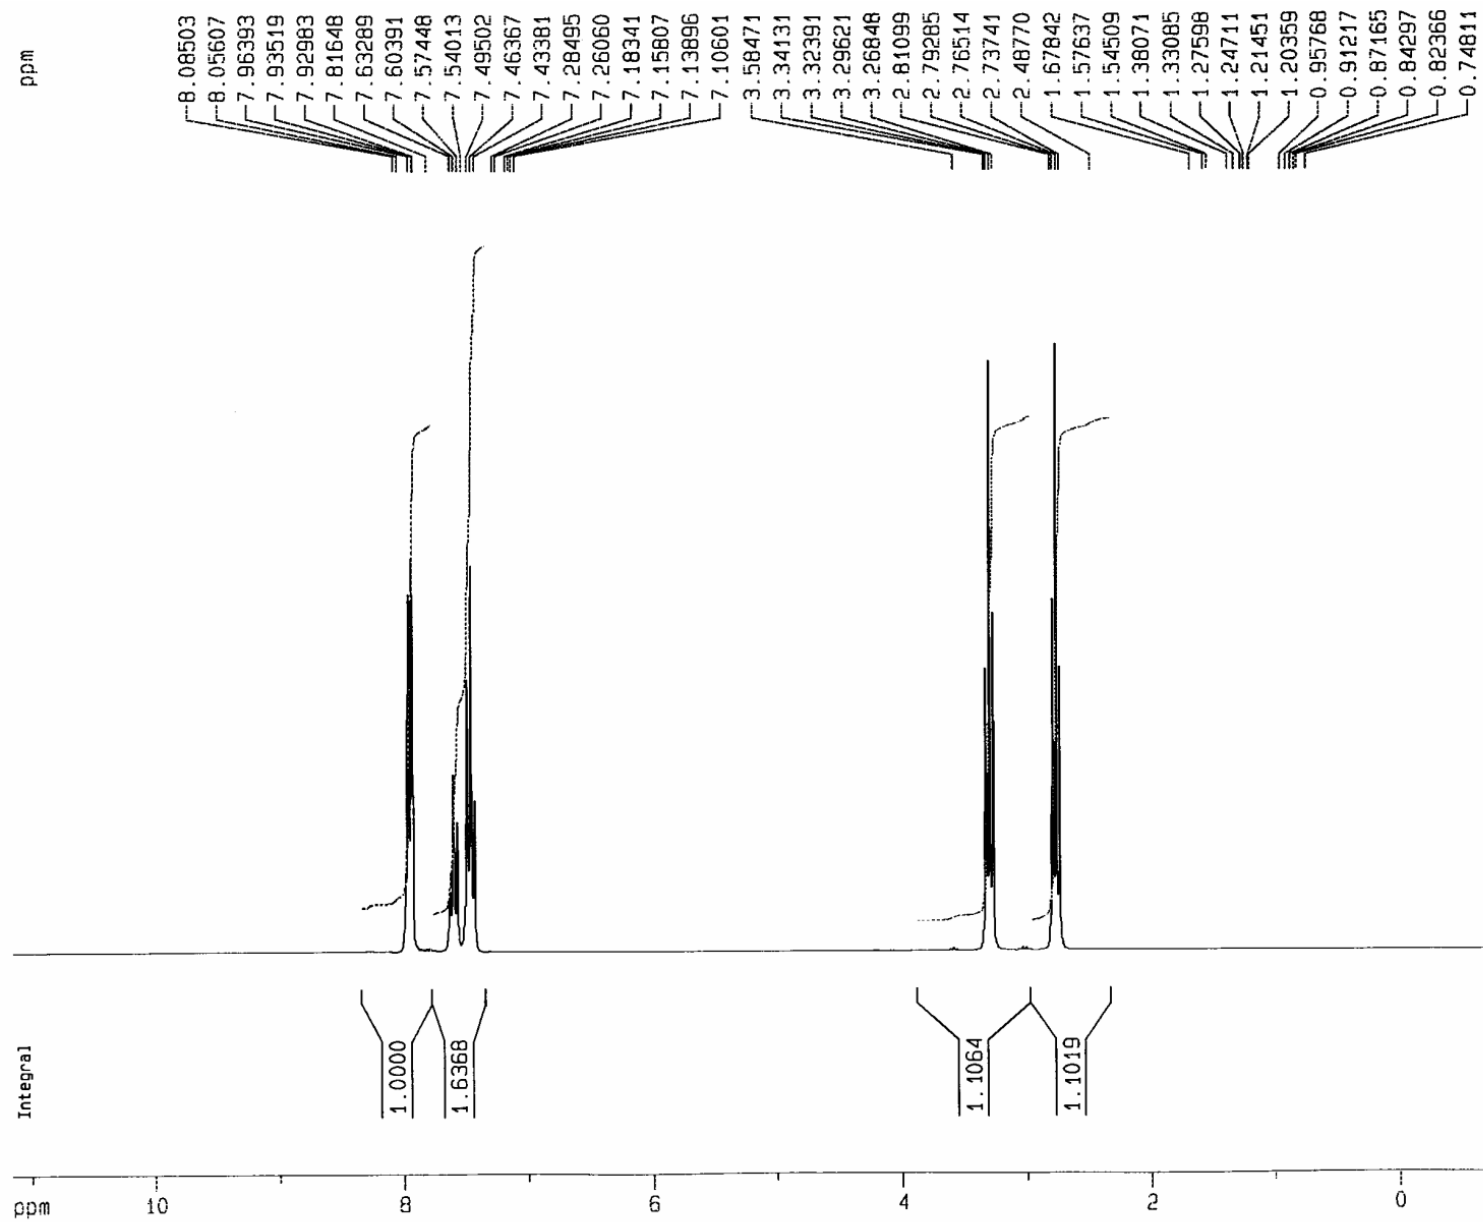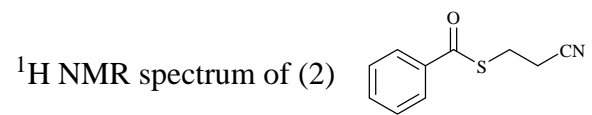

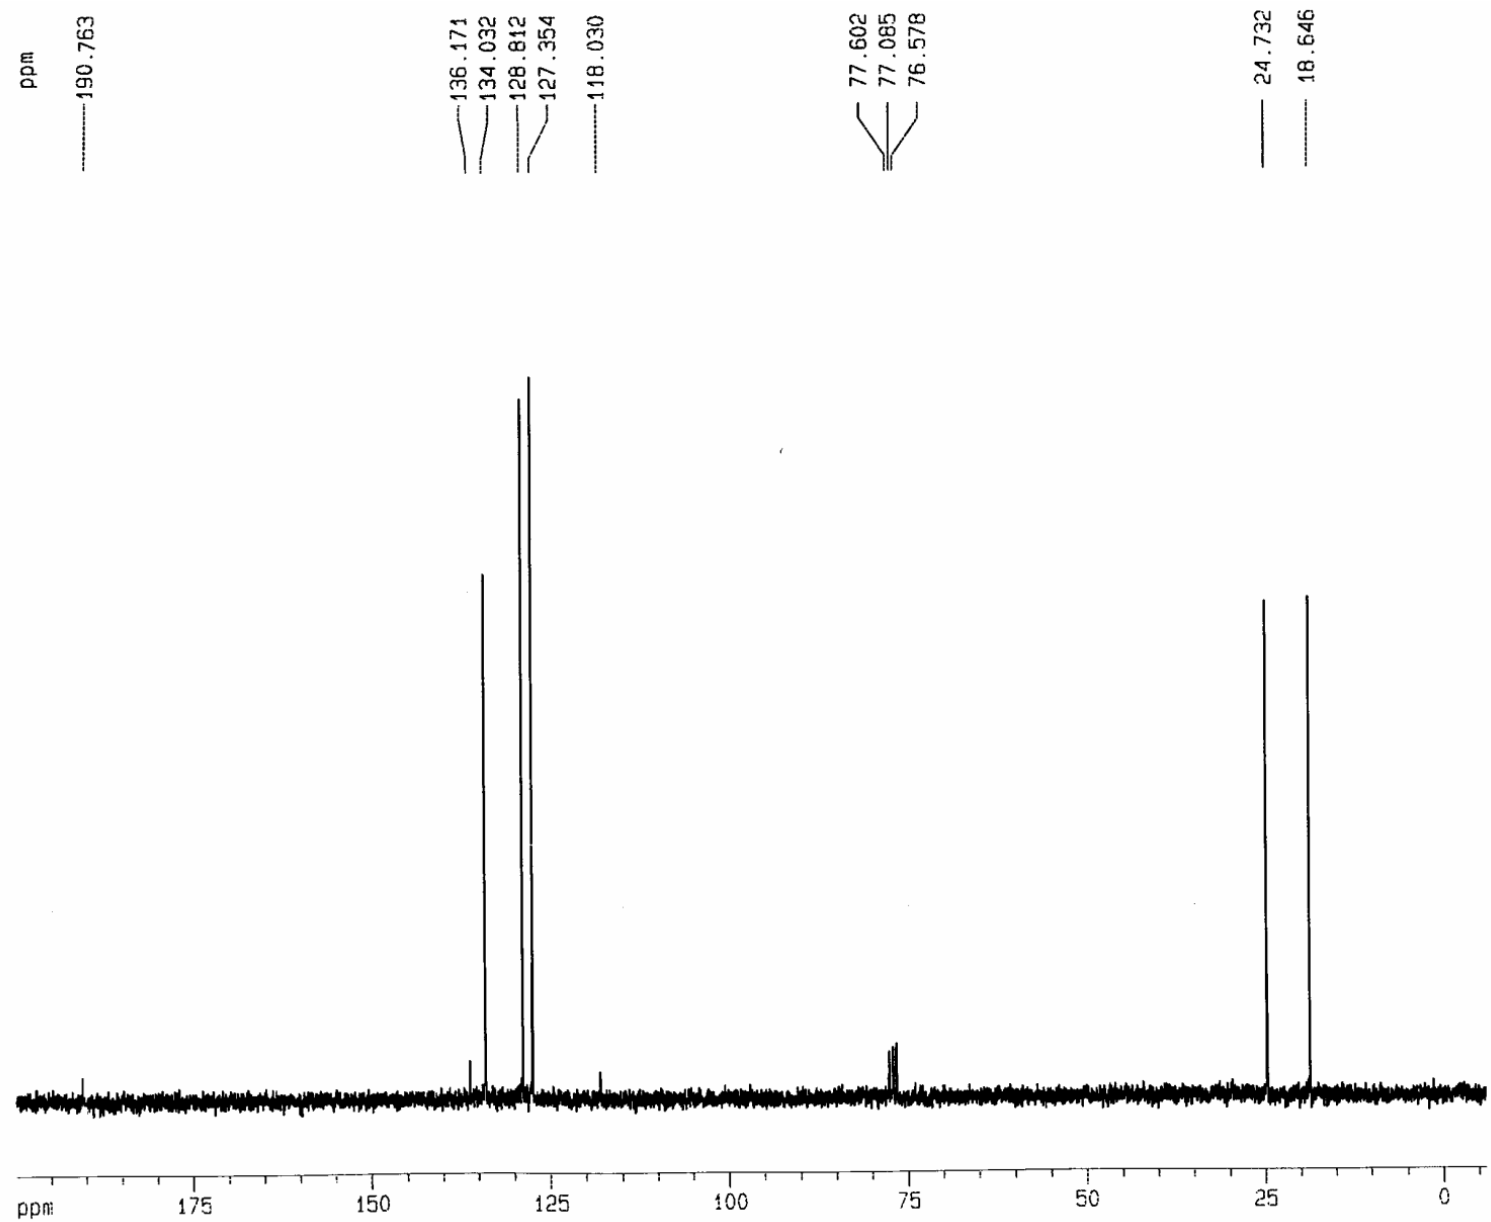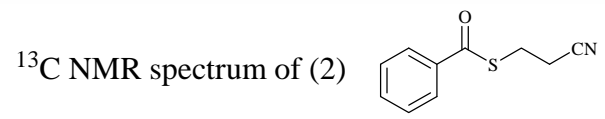

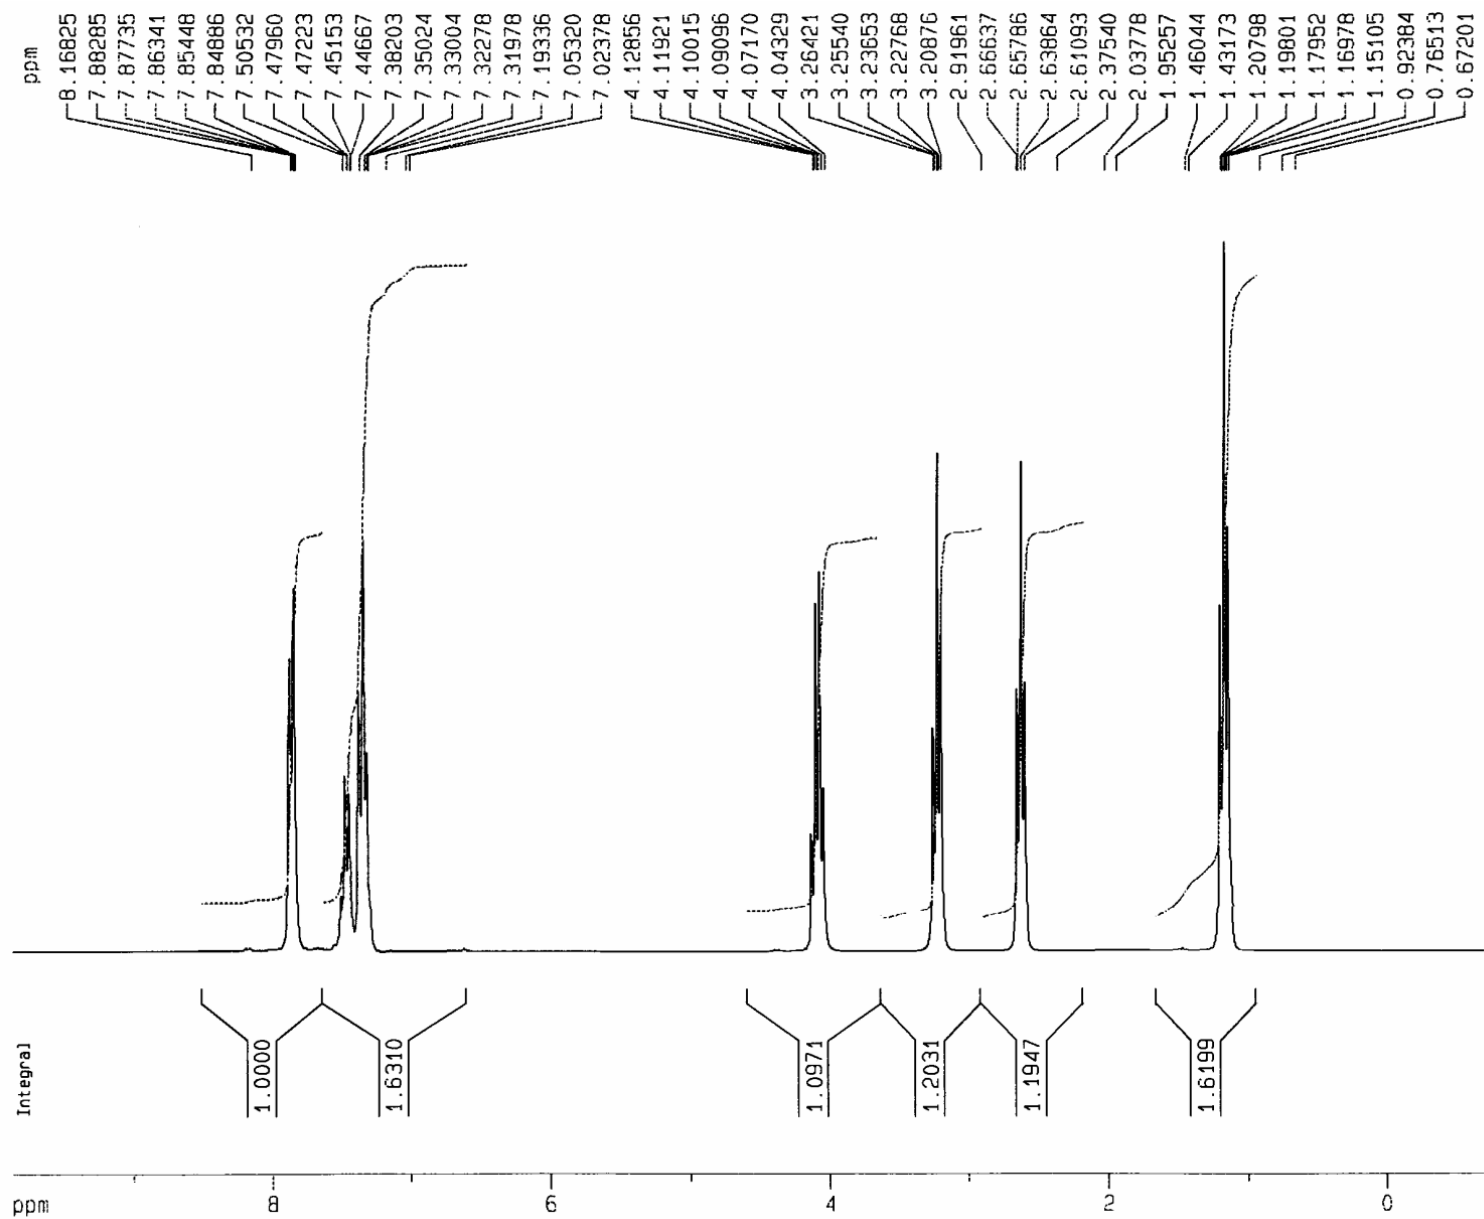

<sup>1</sup>H NMR spectrum of (3) CCOC(=O)CCSC(=O)c1ccccc1

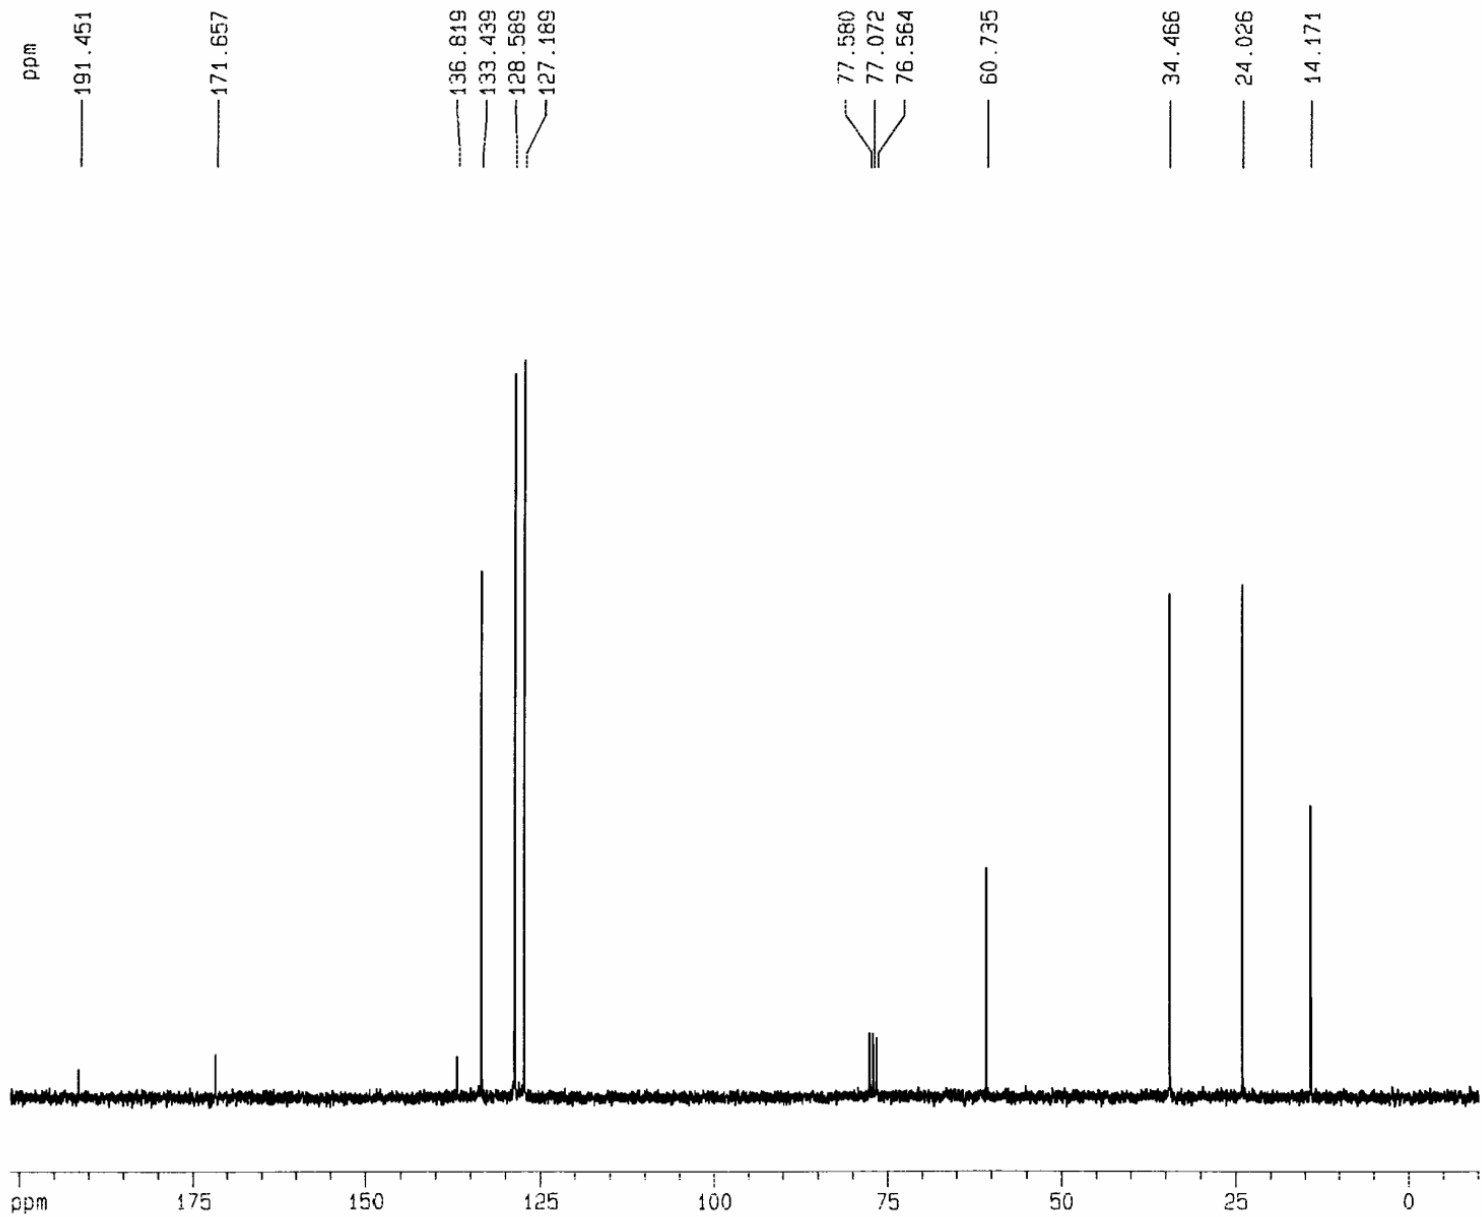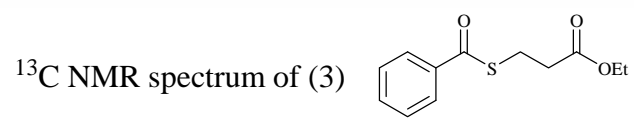

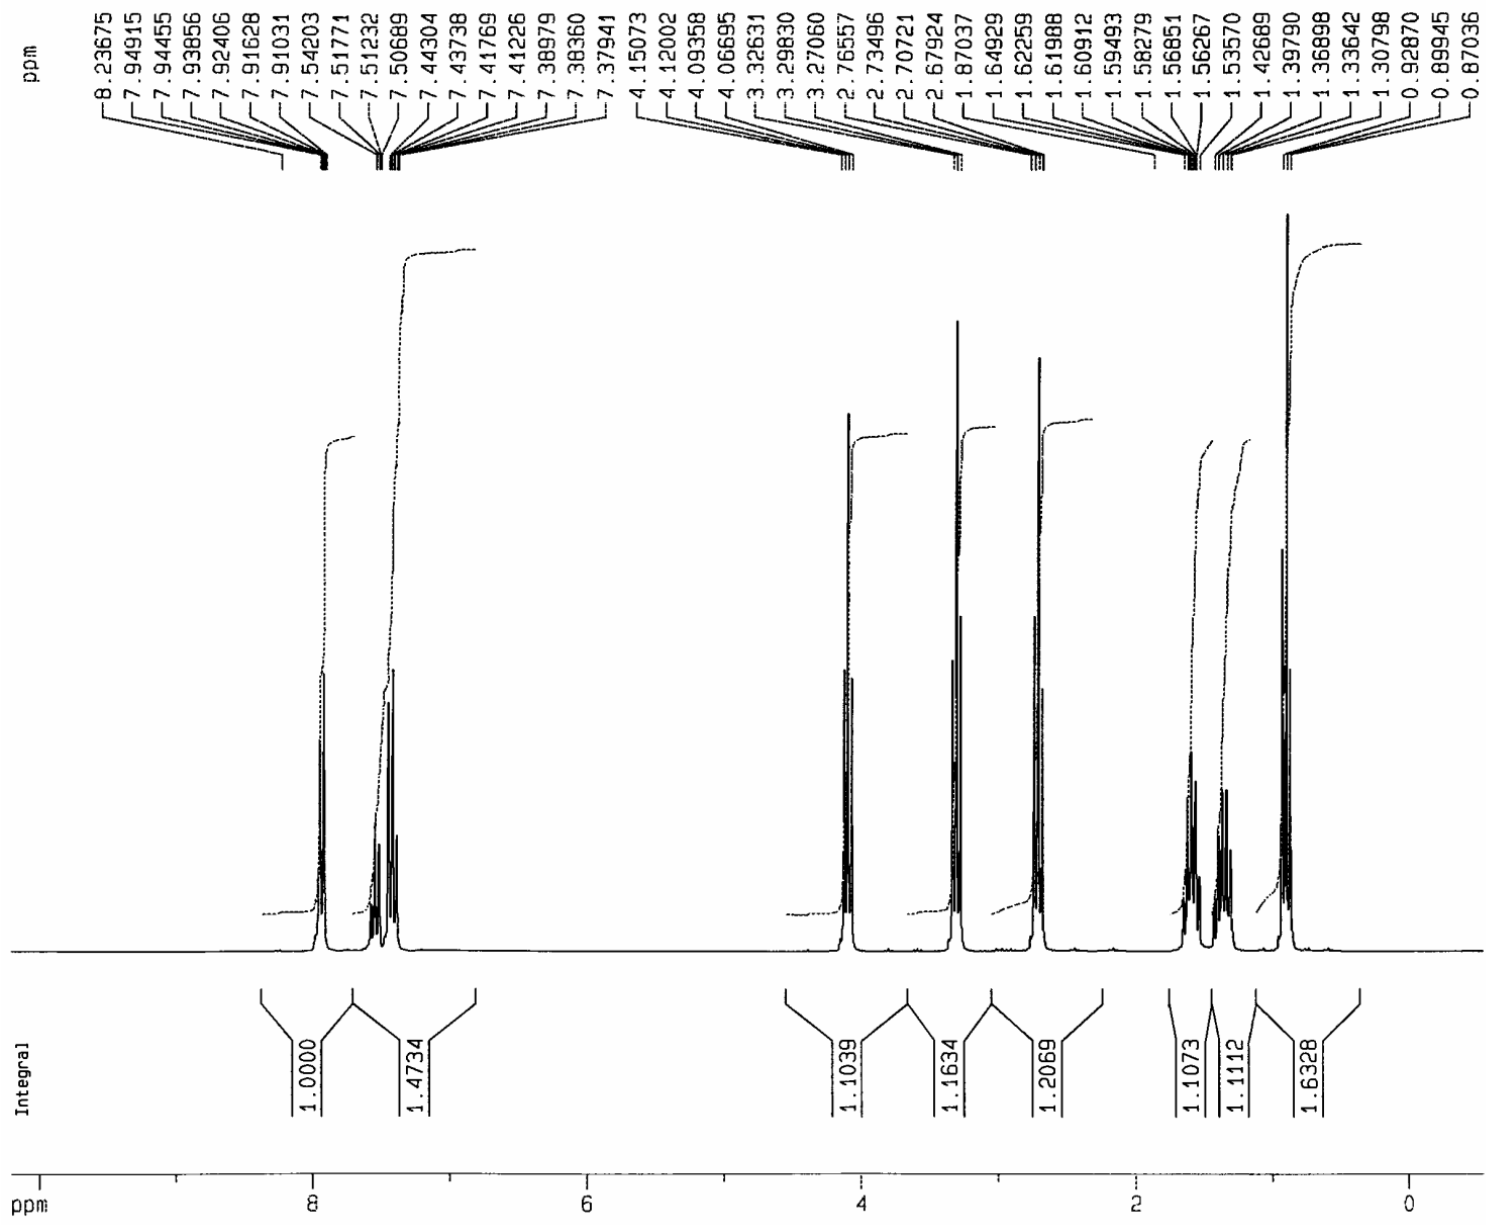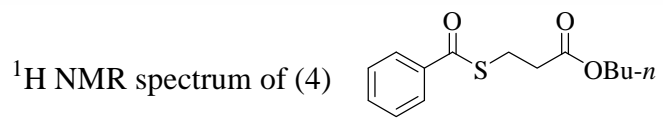



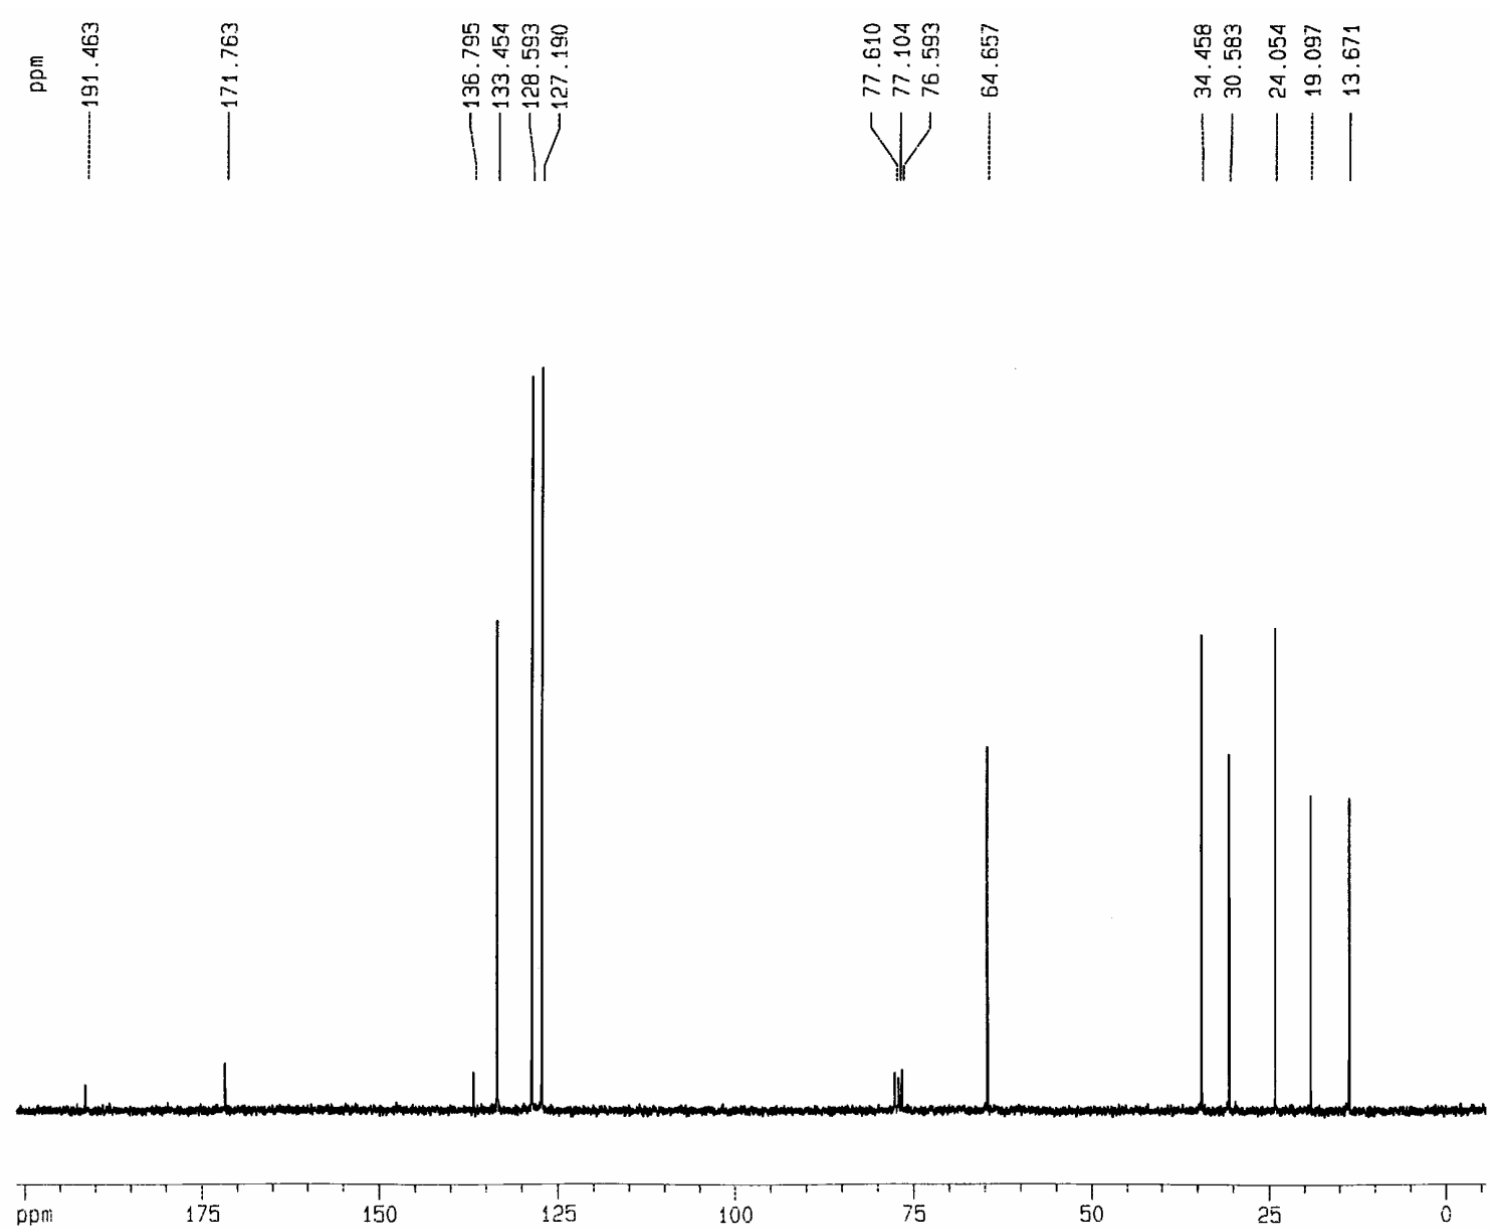

$^{13}\text{C}$  NMR spectrum of (4)

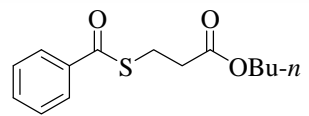

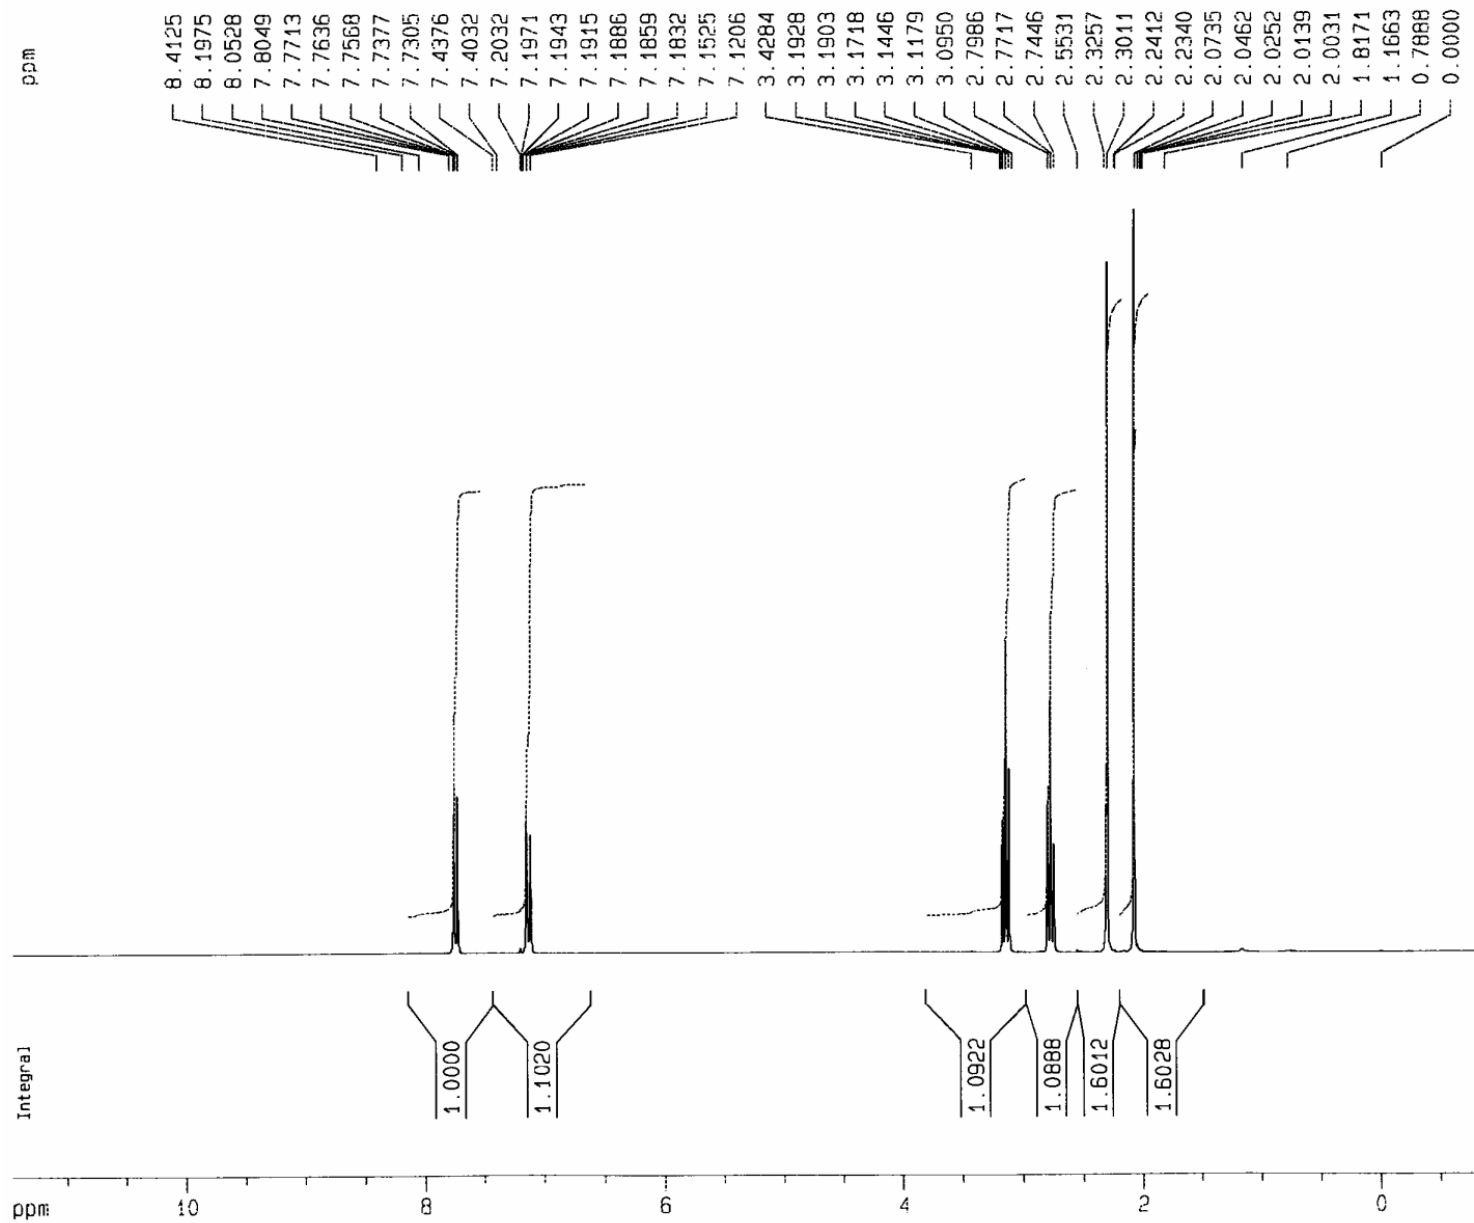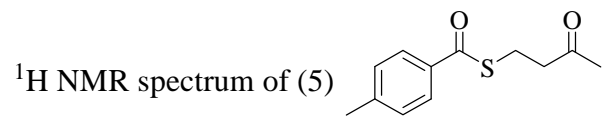

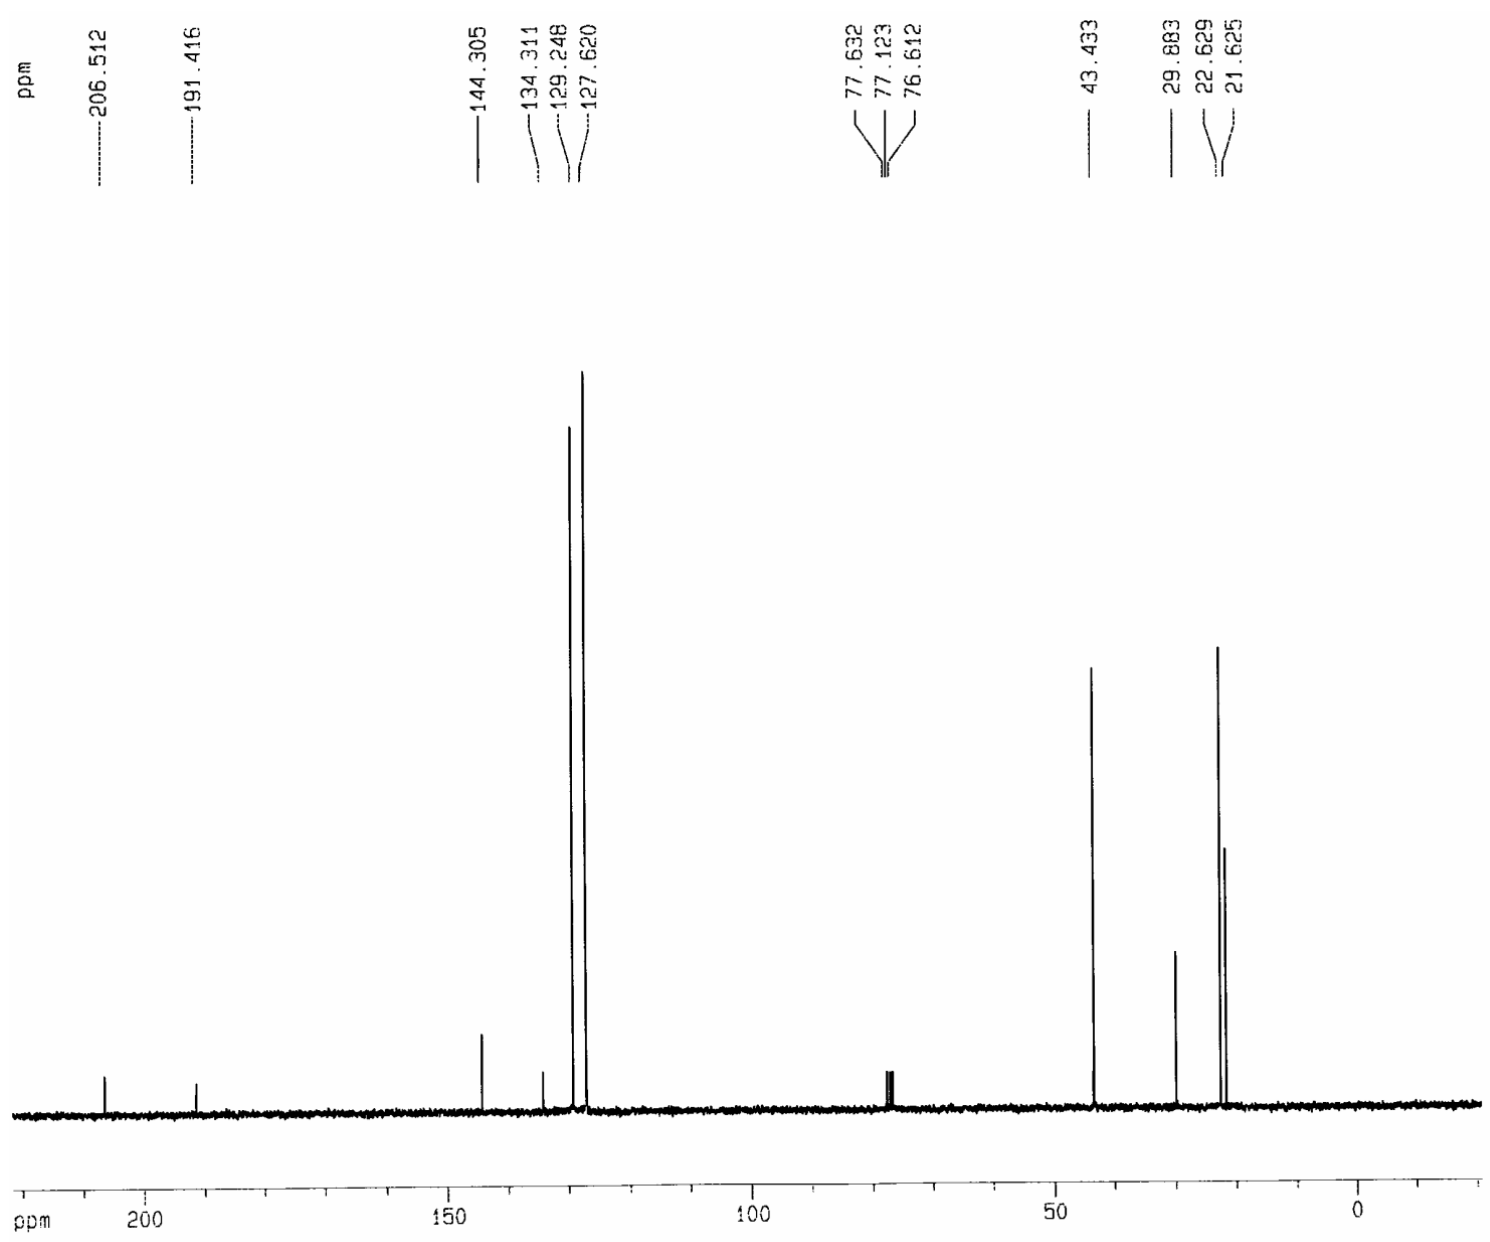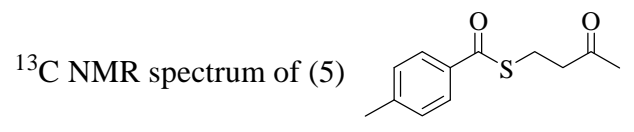

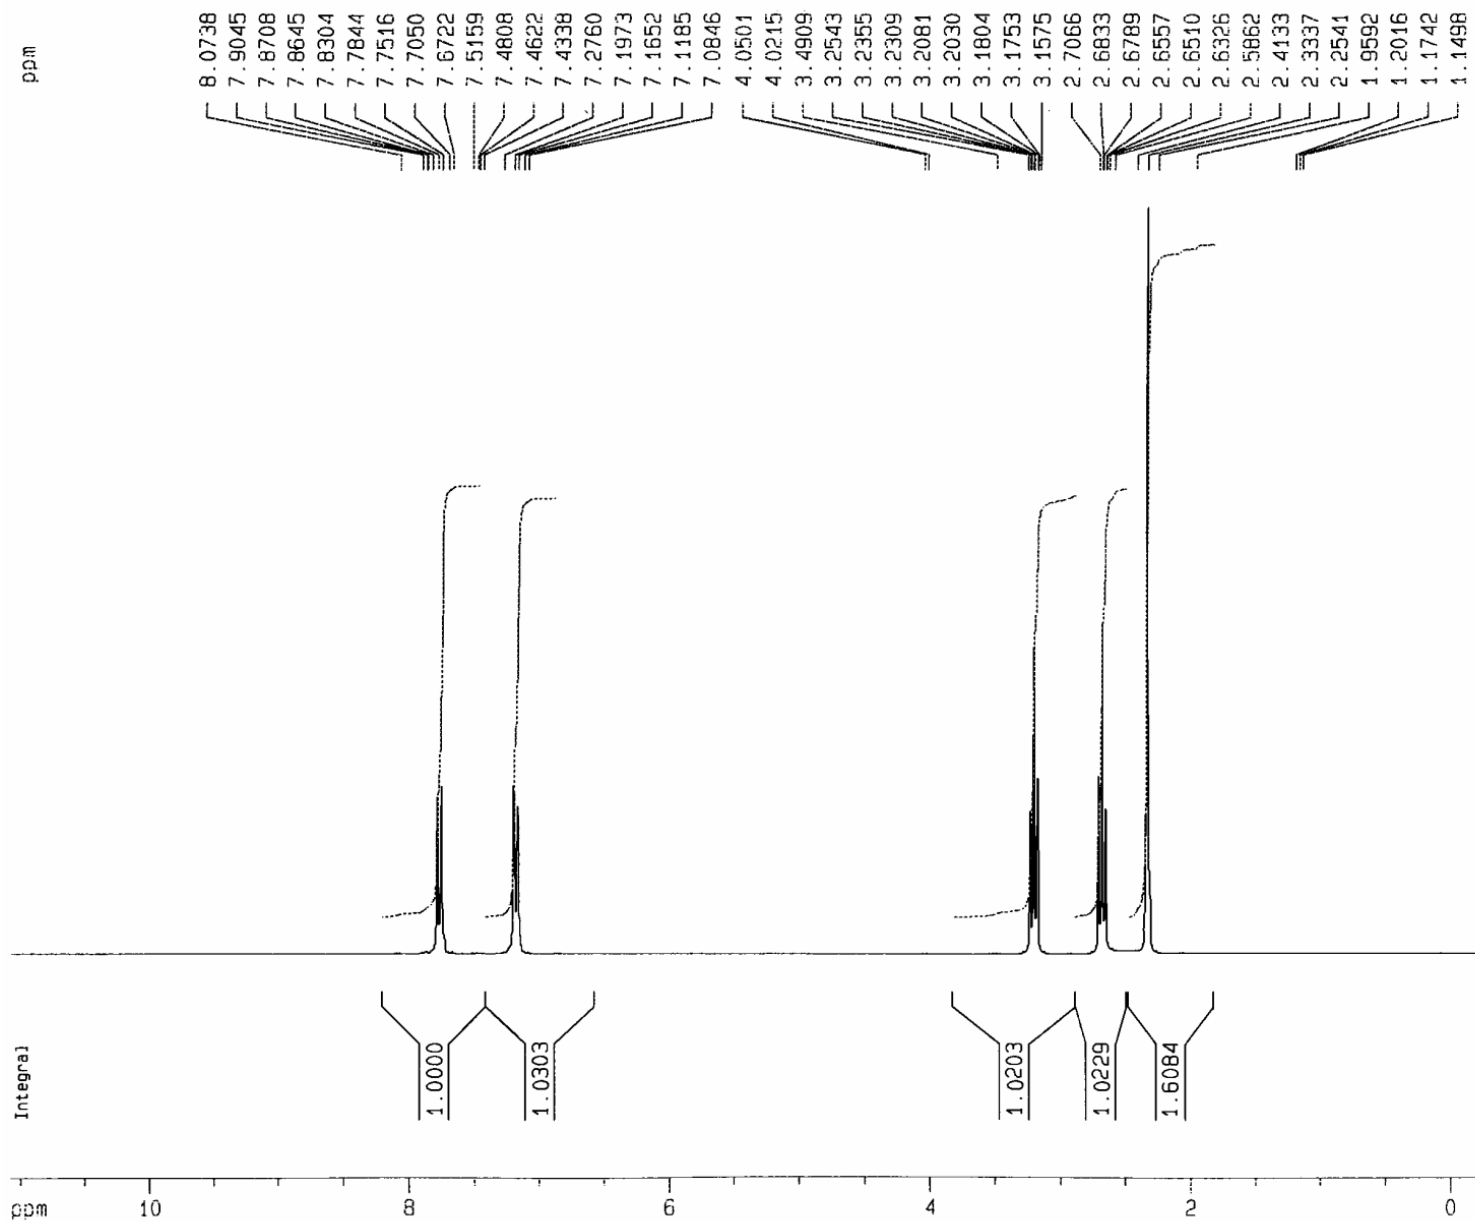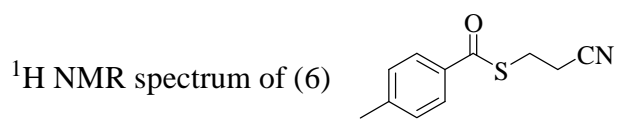

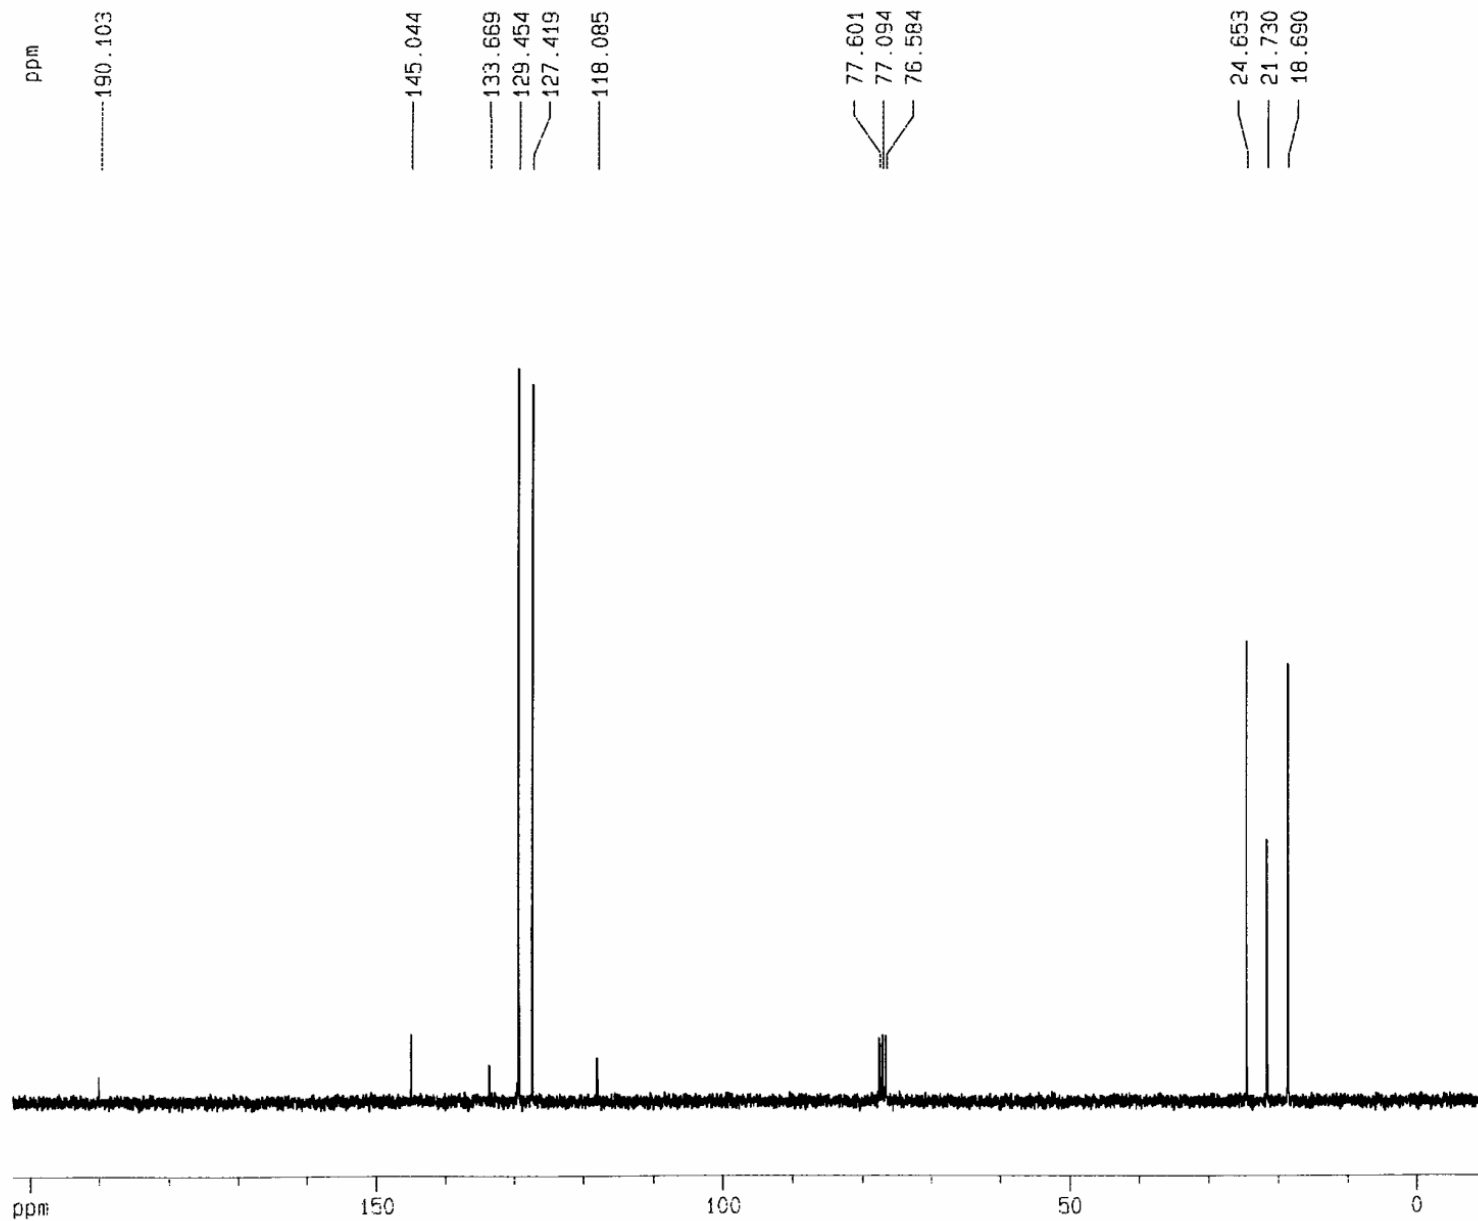

$^{13}\text{C}$  NMR spectrum of (6)

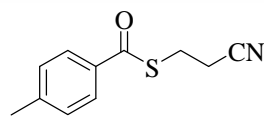

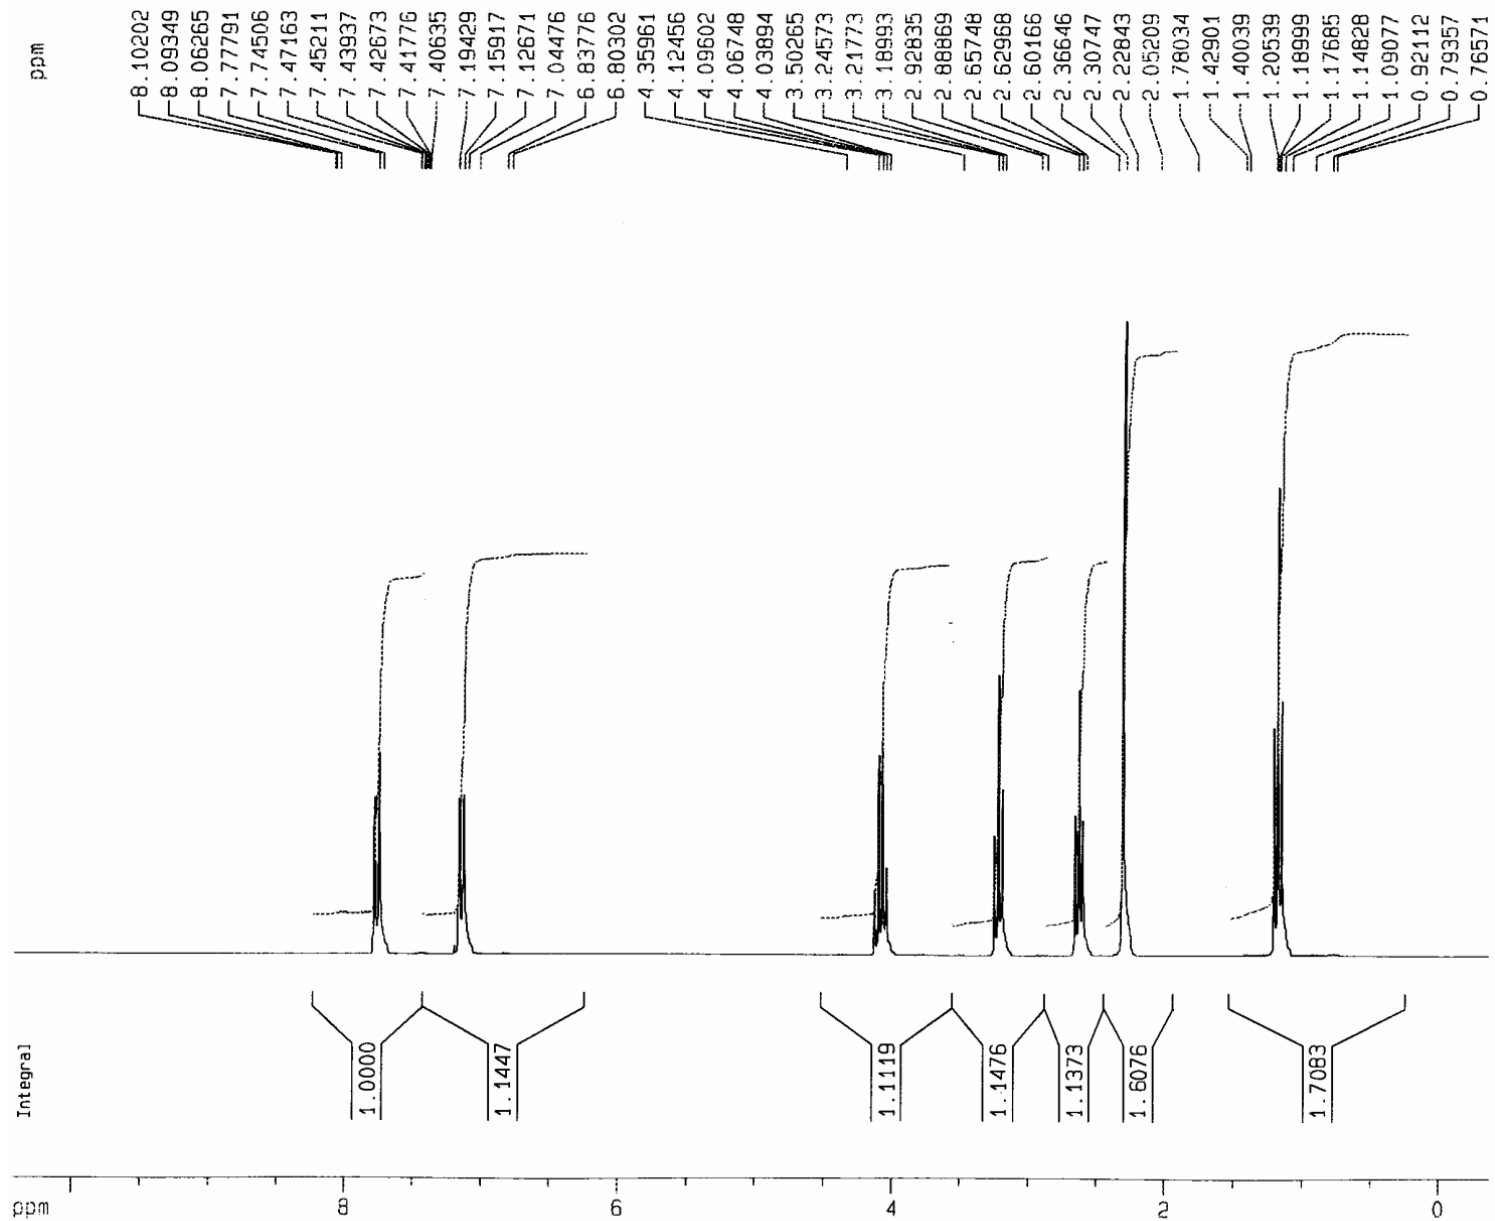

<sup>1</sup>H NMR spectrum of (7)

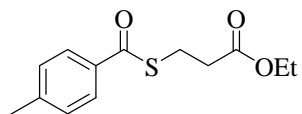

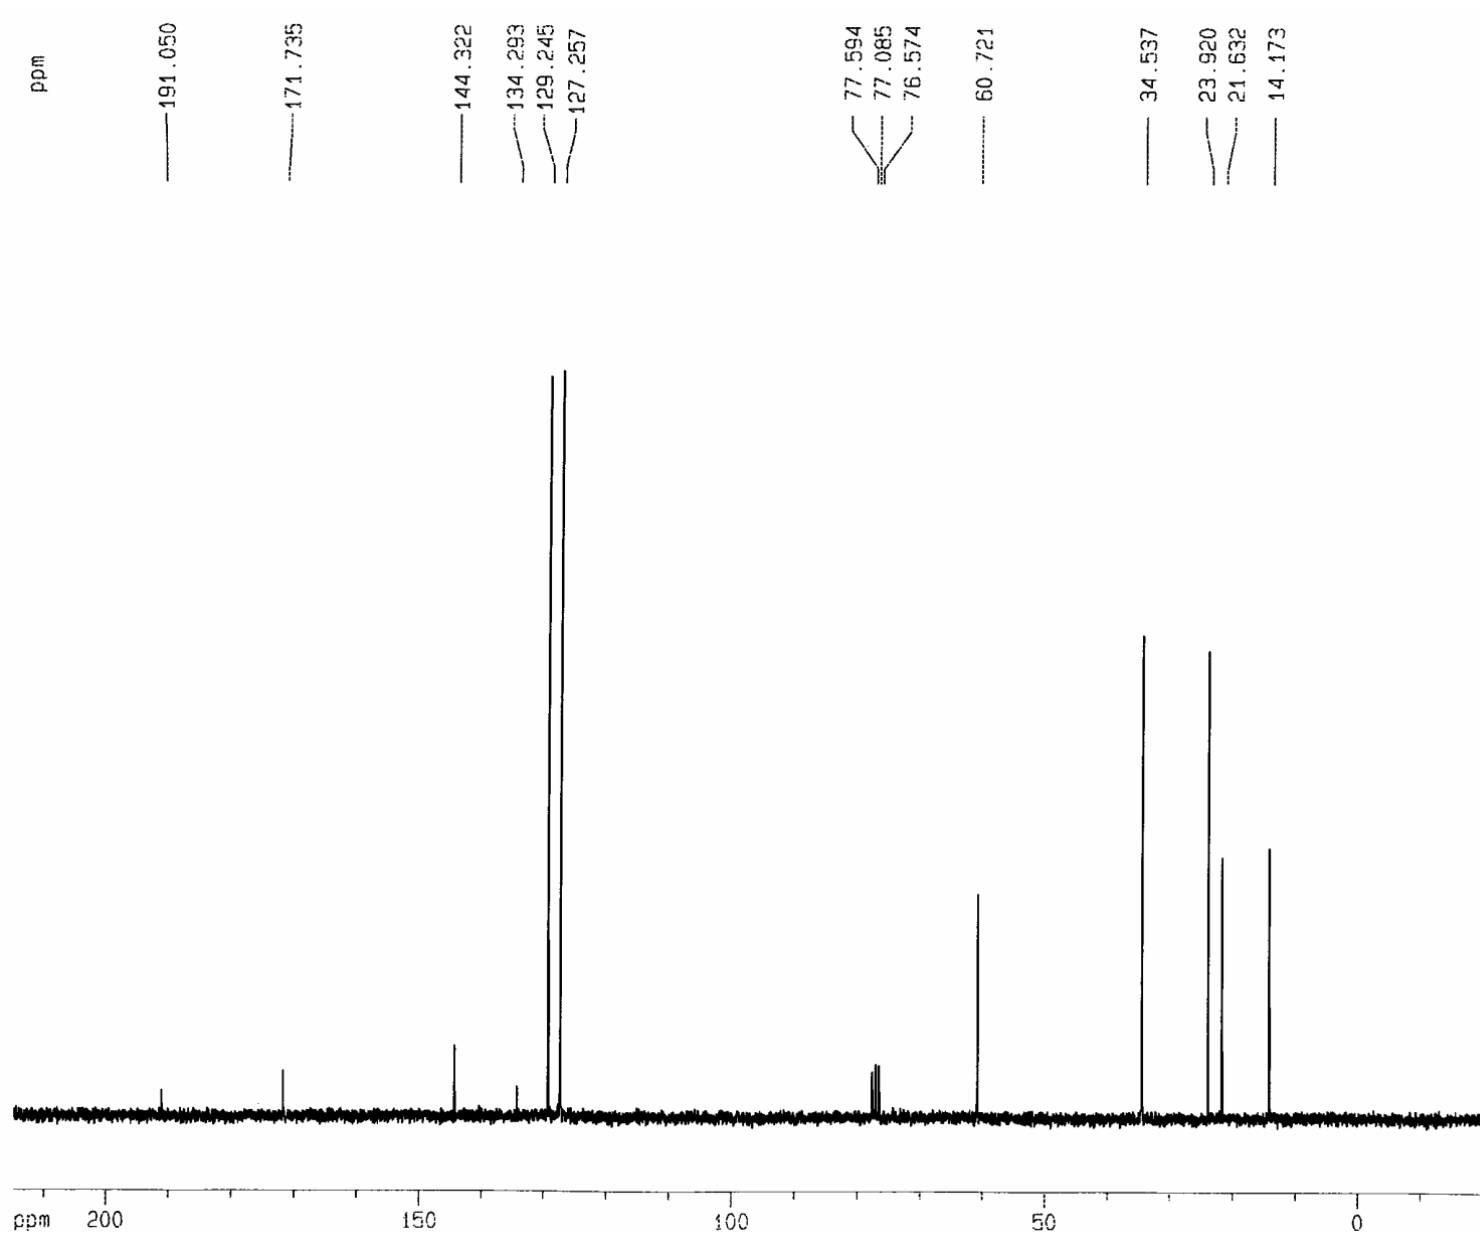

<sup>13</sup>C NMR spectrum of (7)

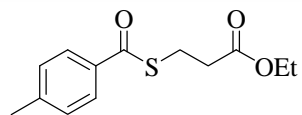

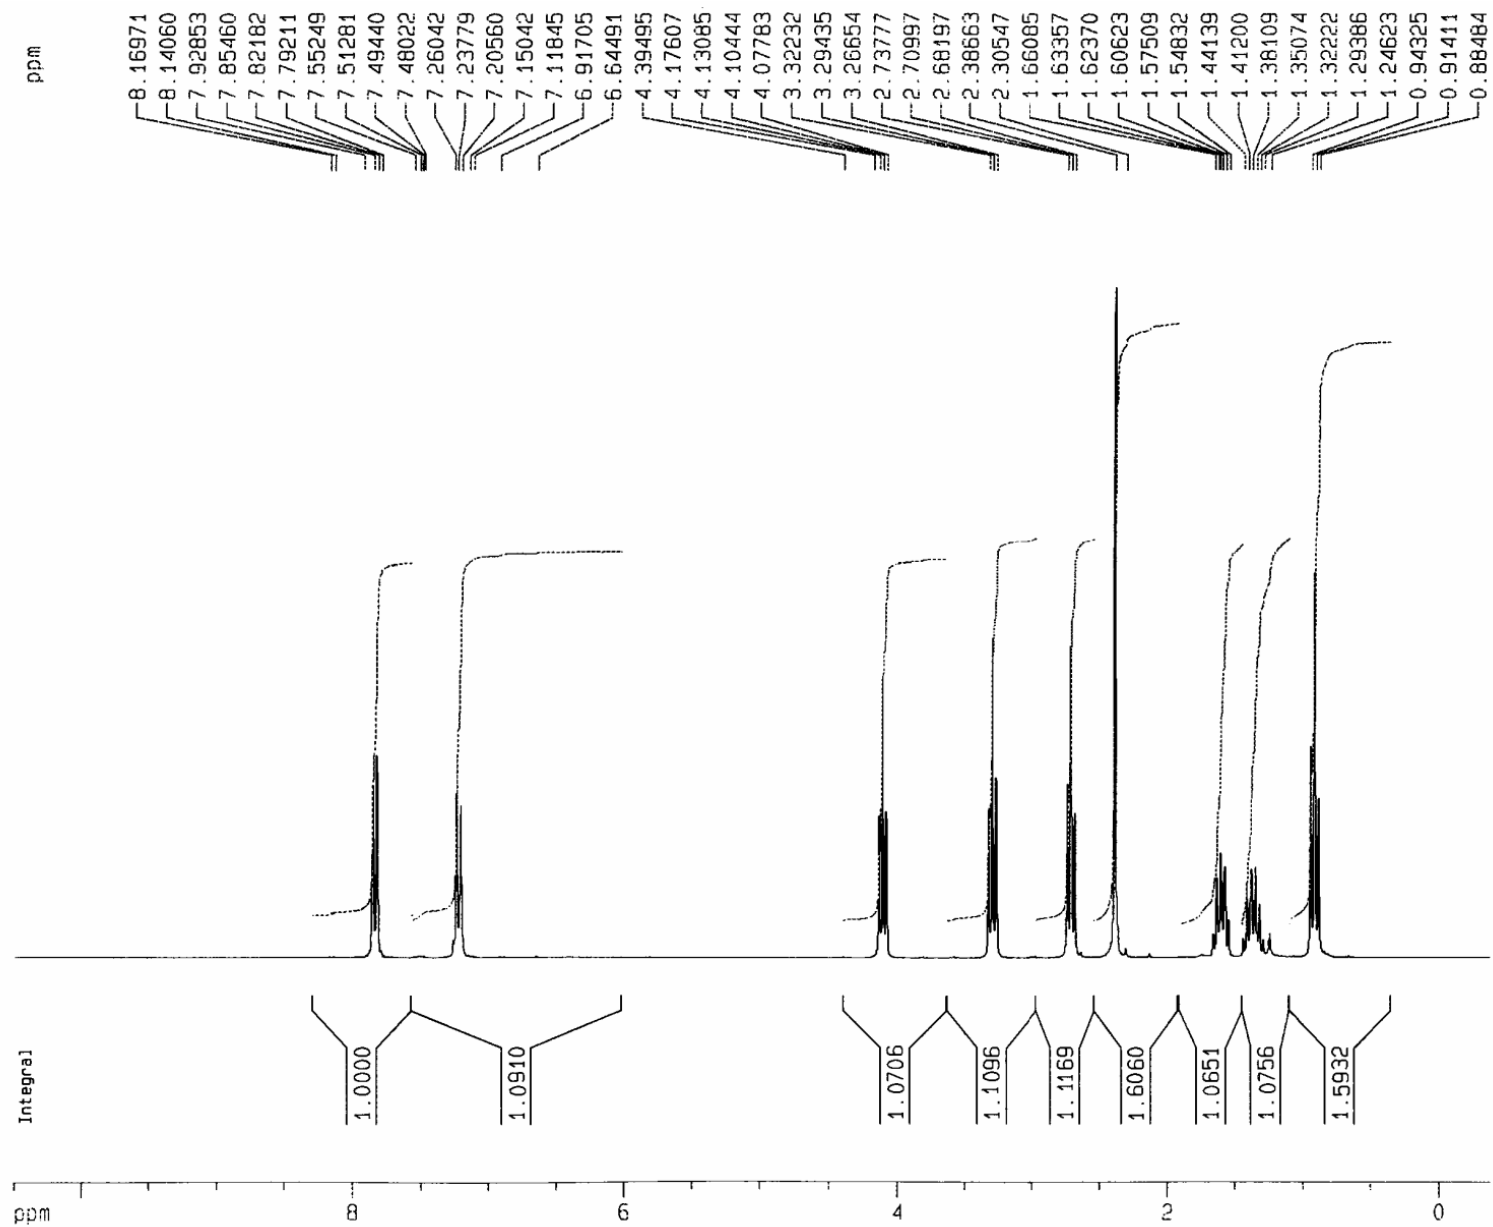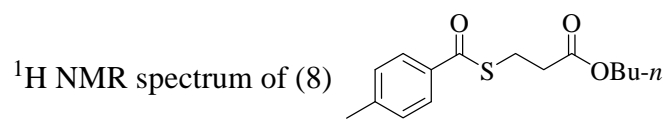



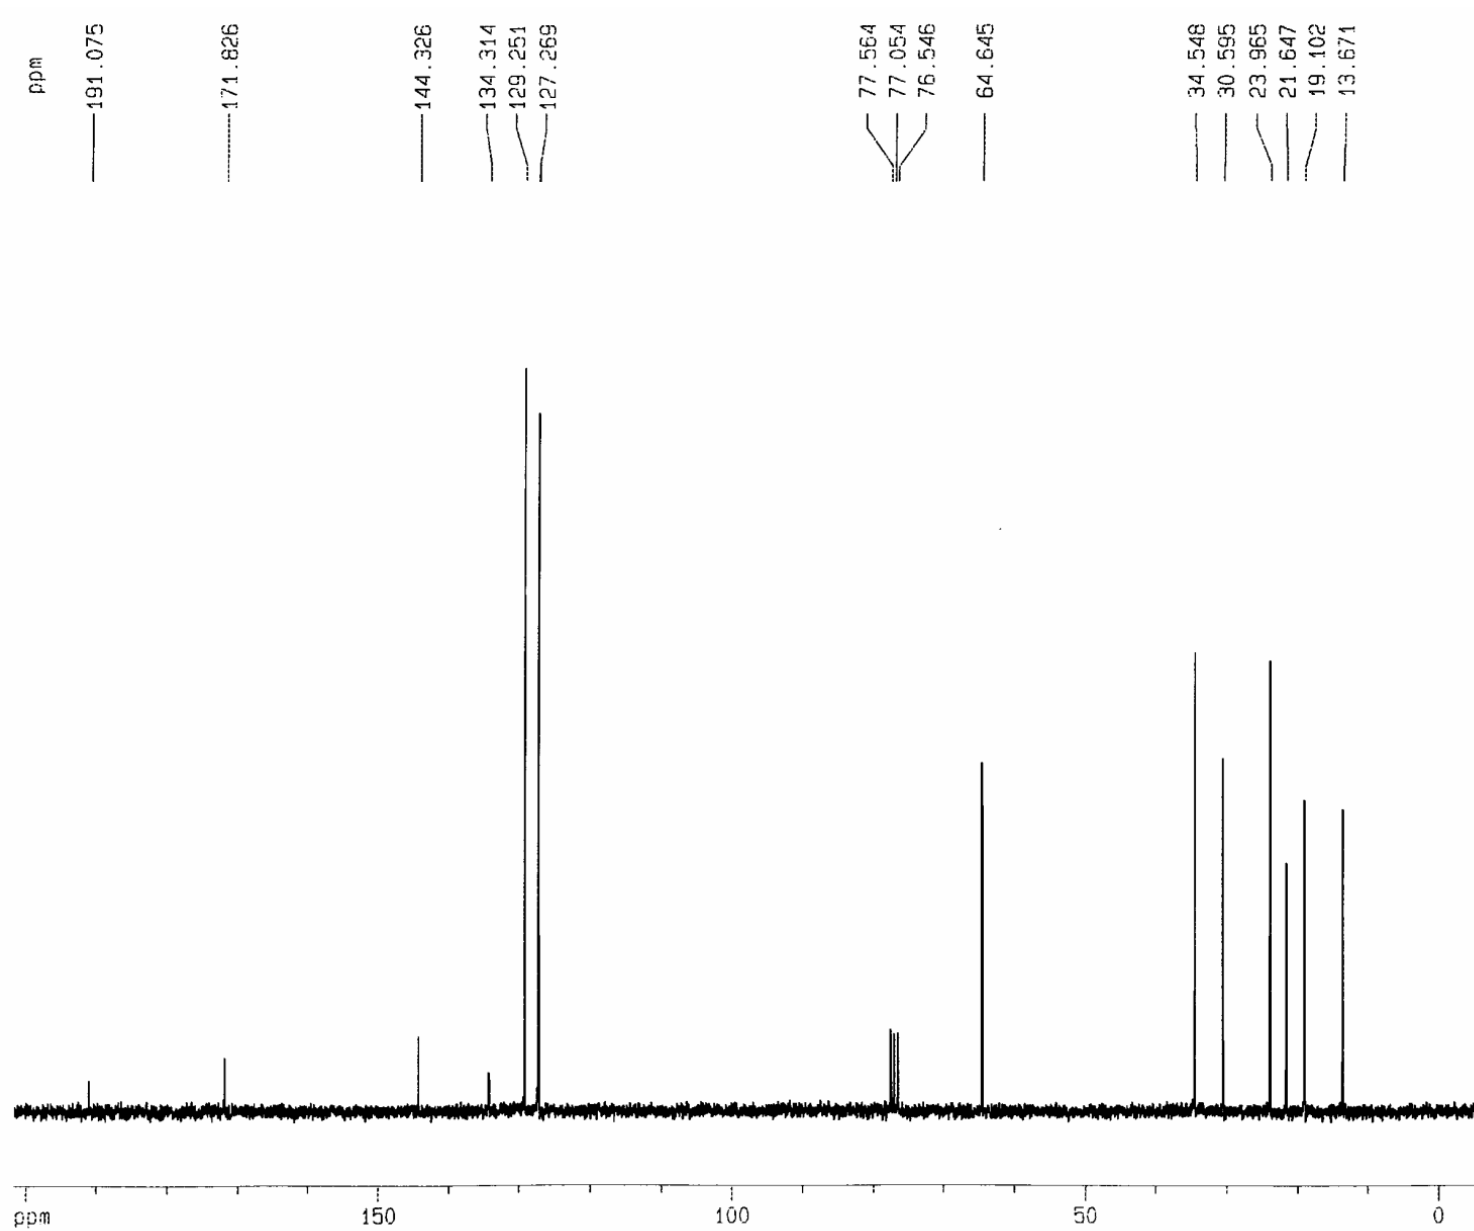

$^{13}\text{C}$  NMR spectrum of (8)

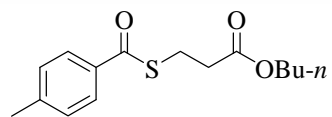

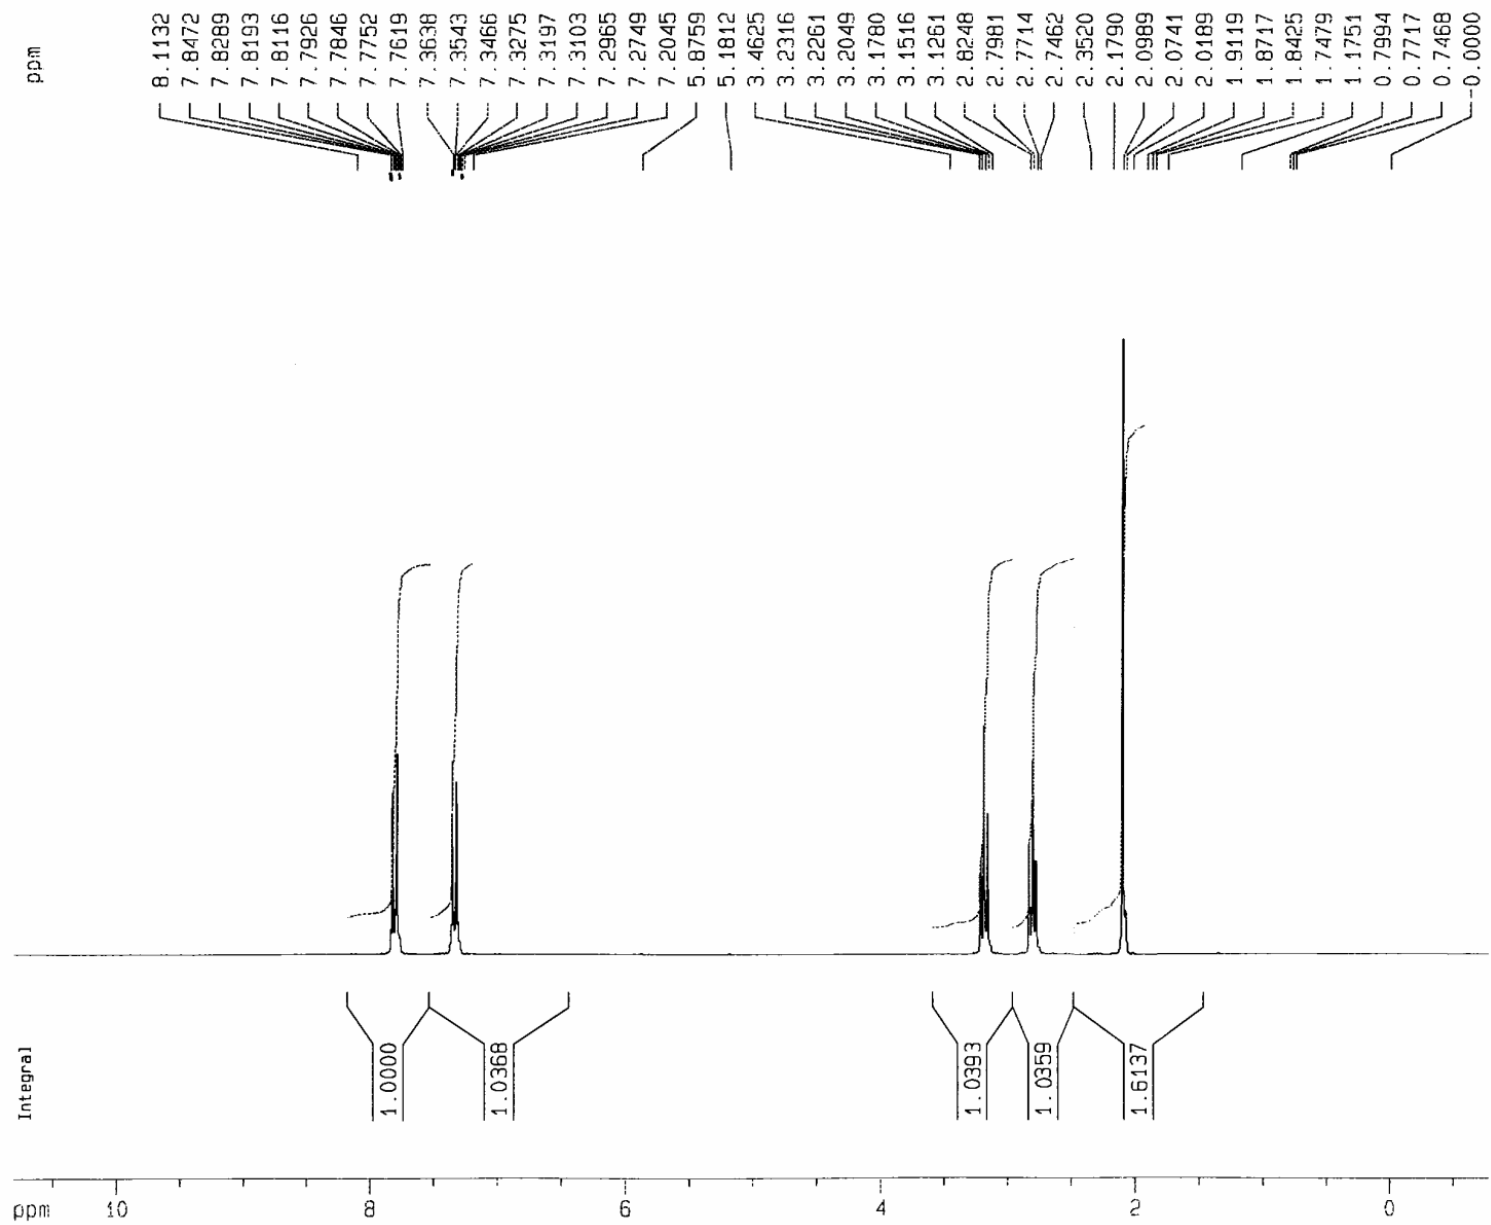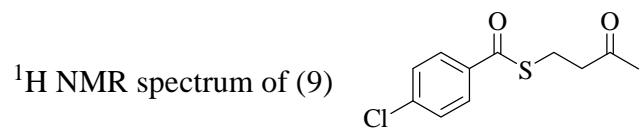

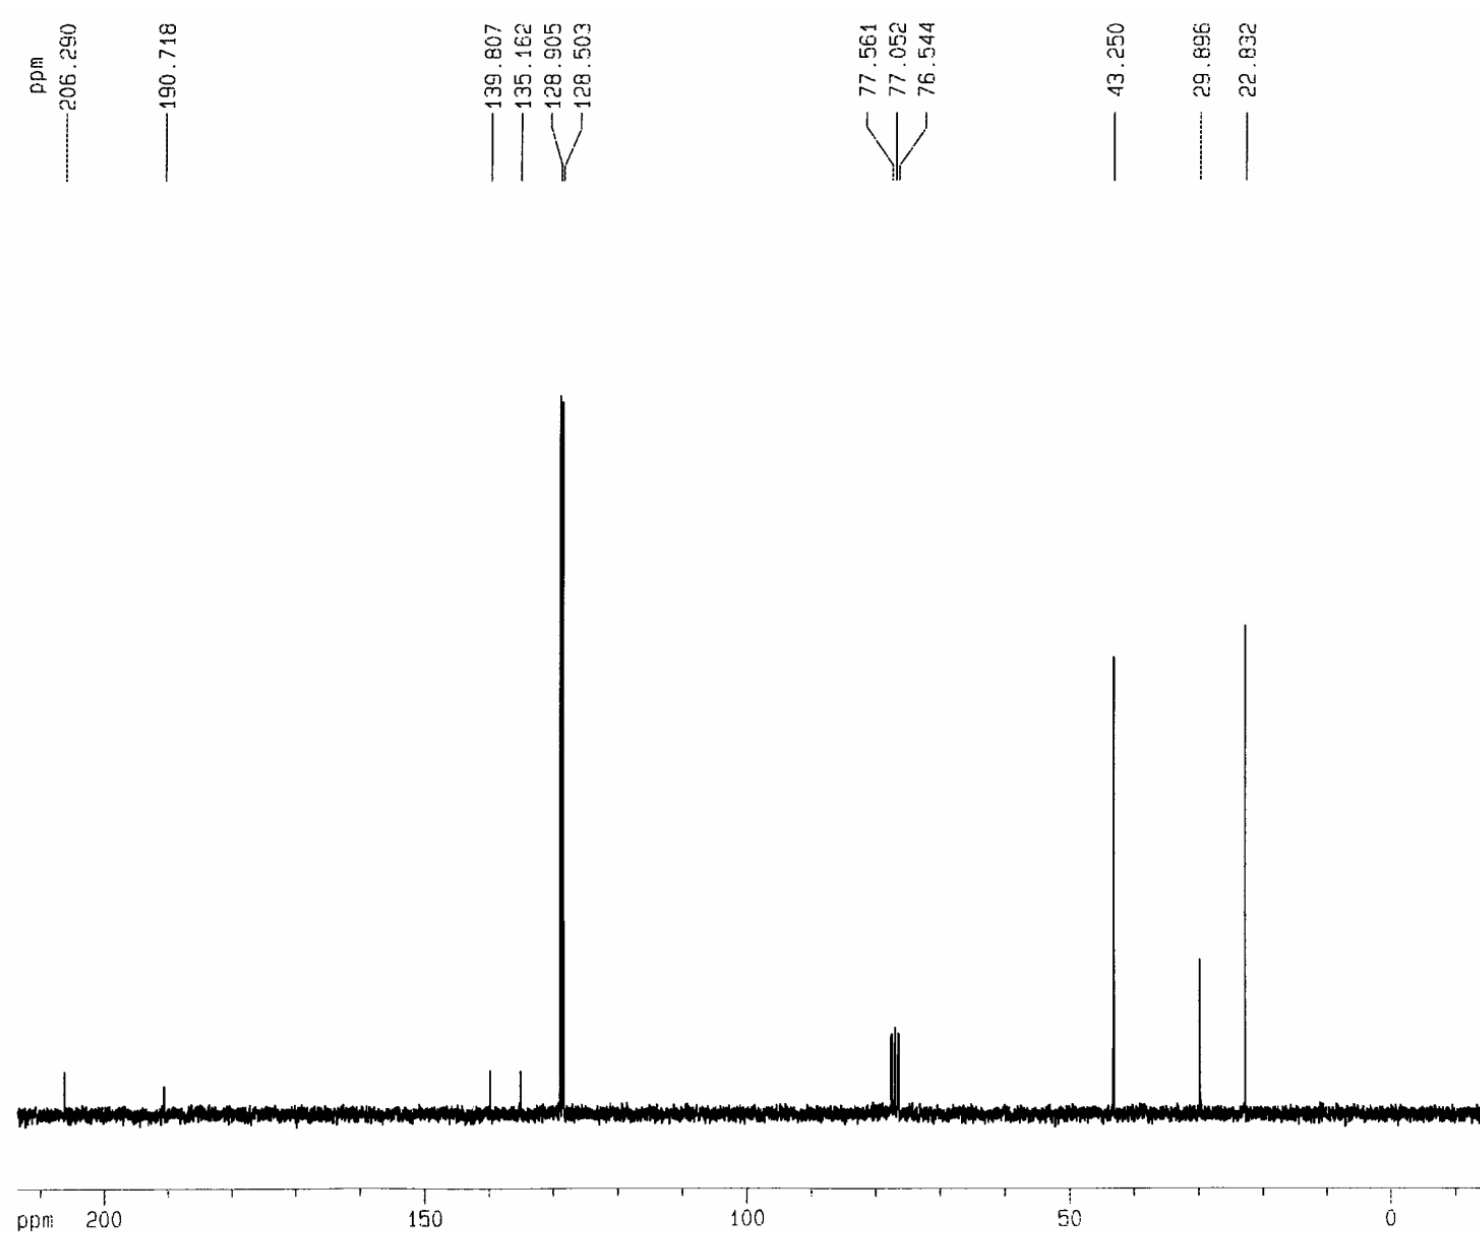

$^{13}\text{C}$  NMR spectrum of (9)

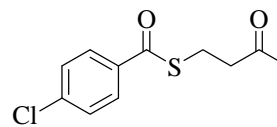

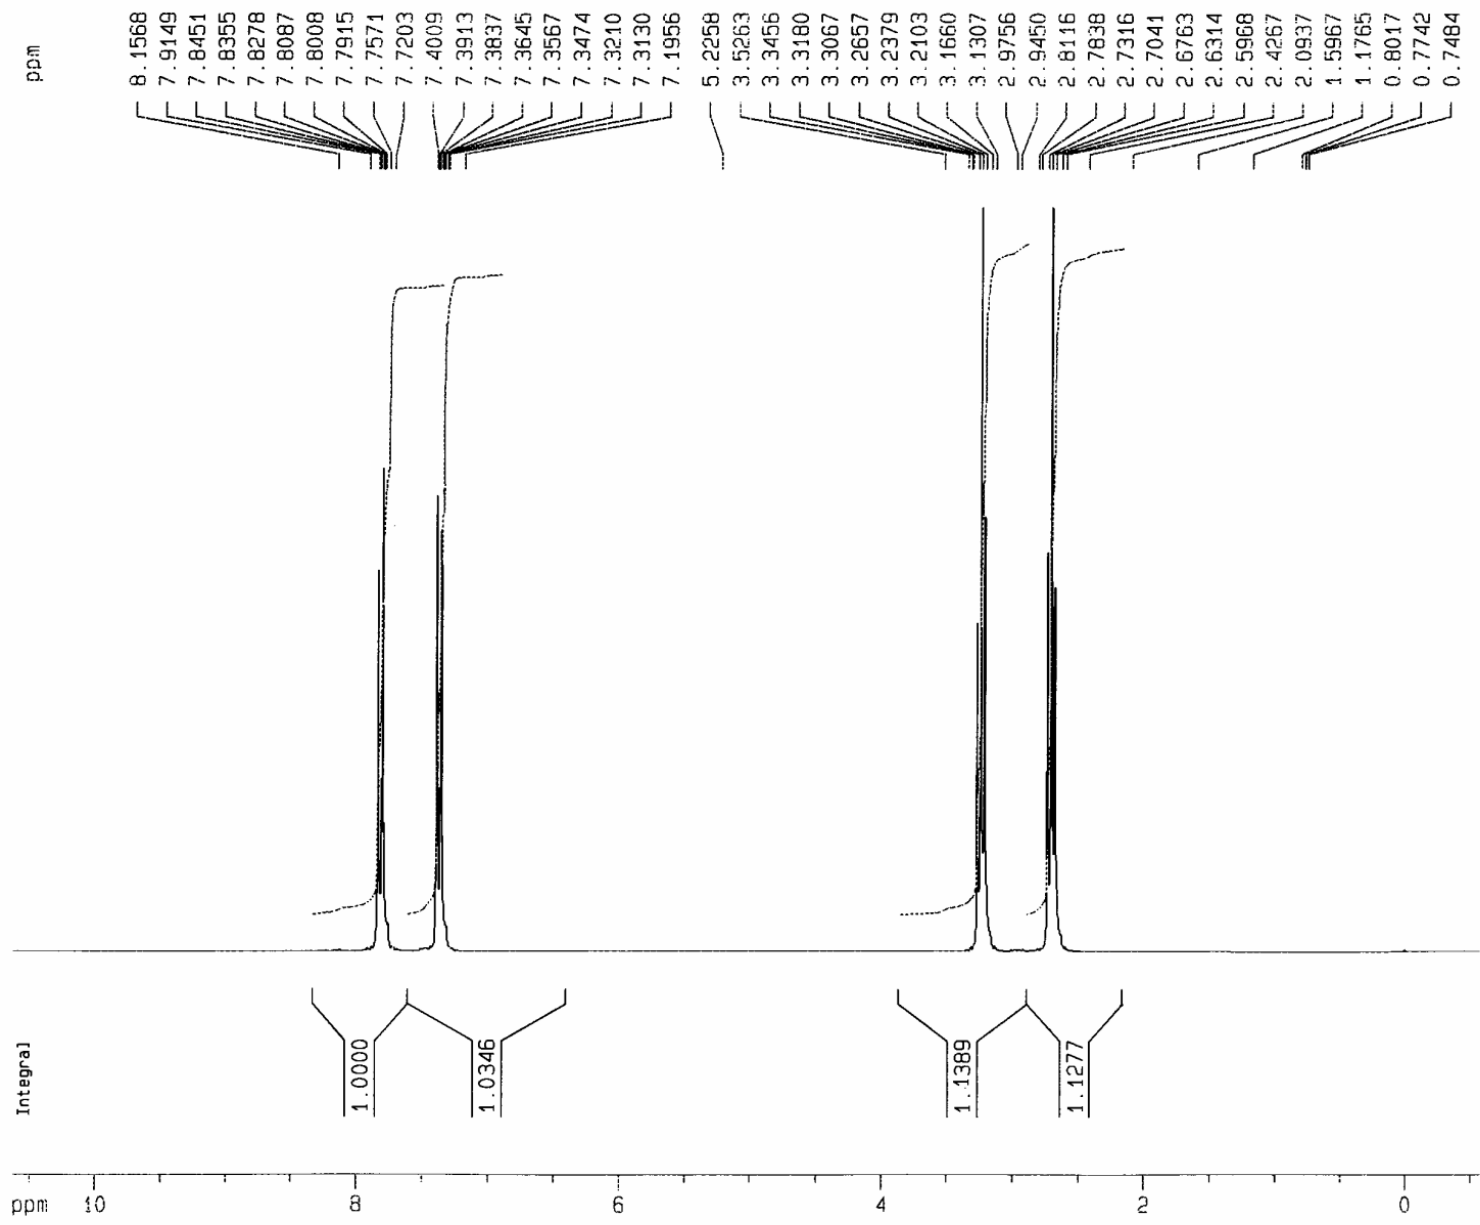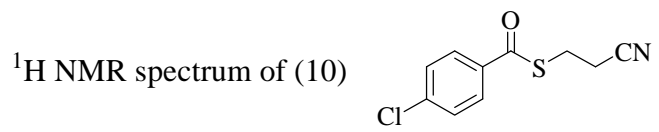

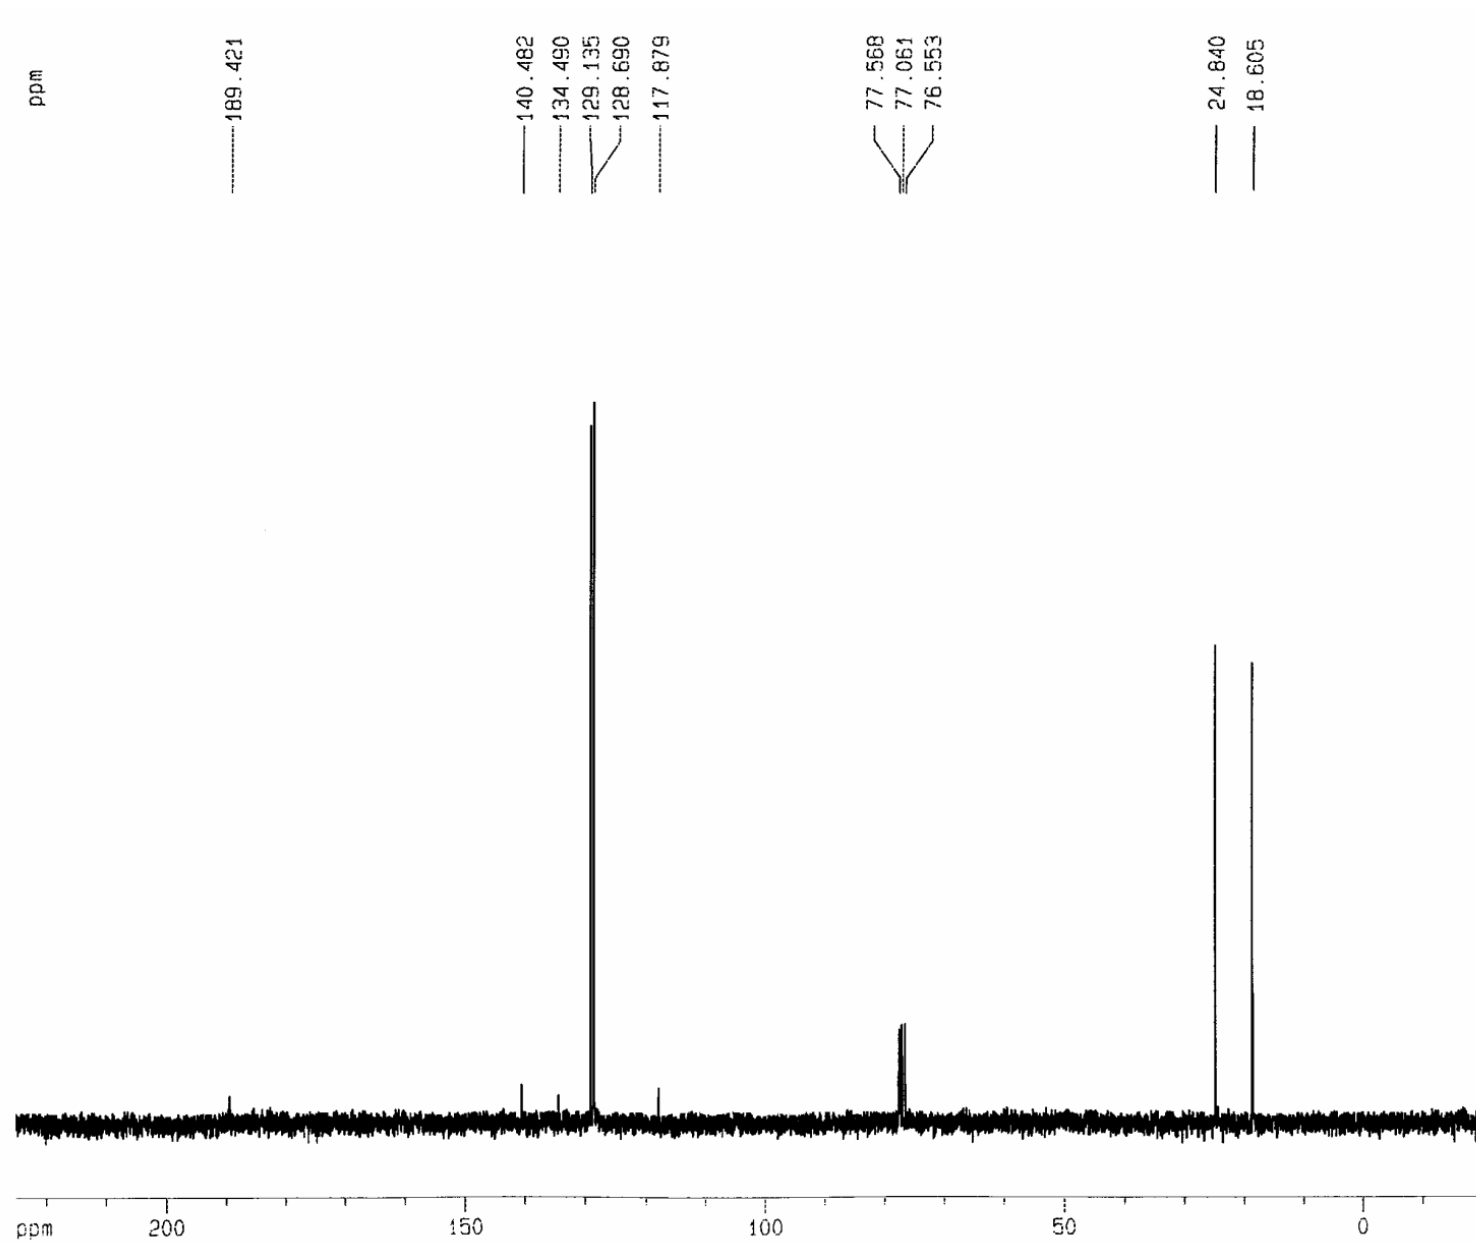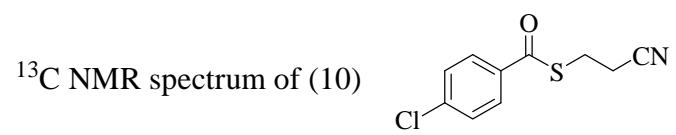

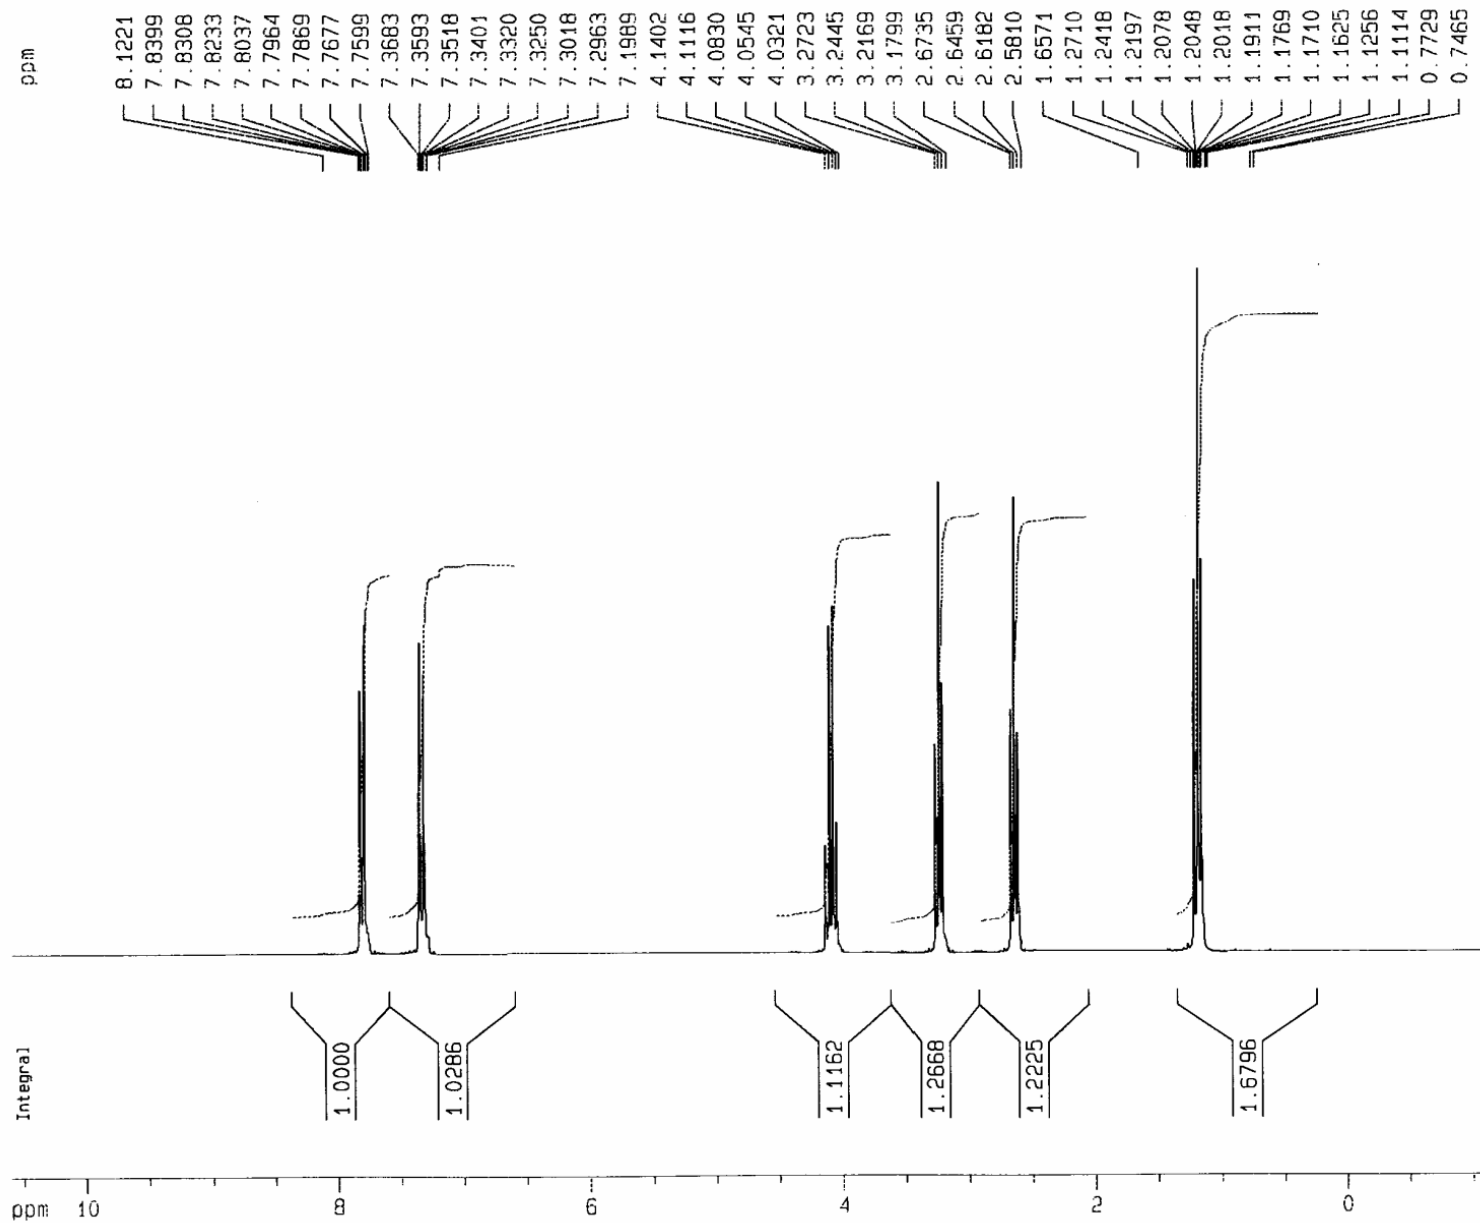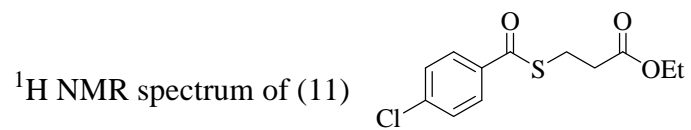

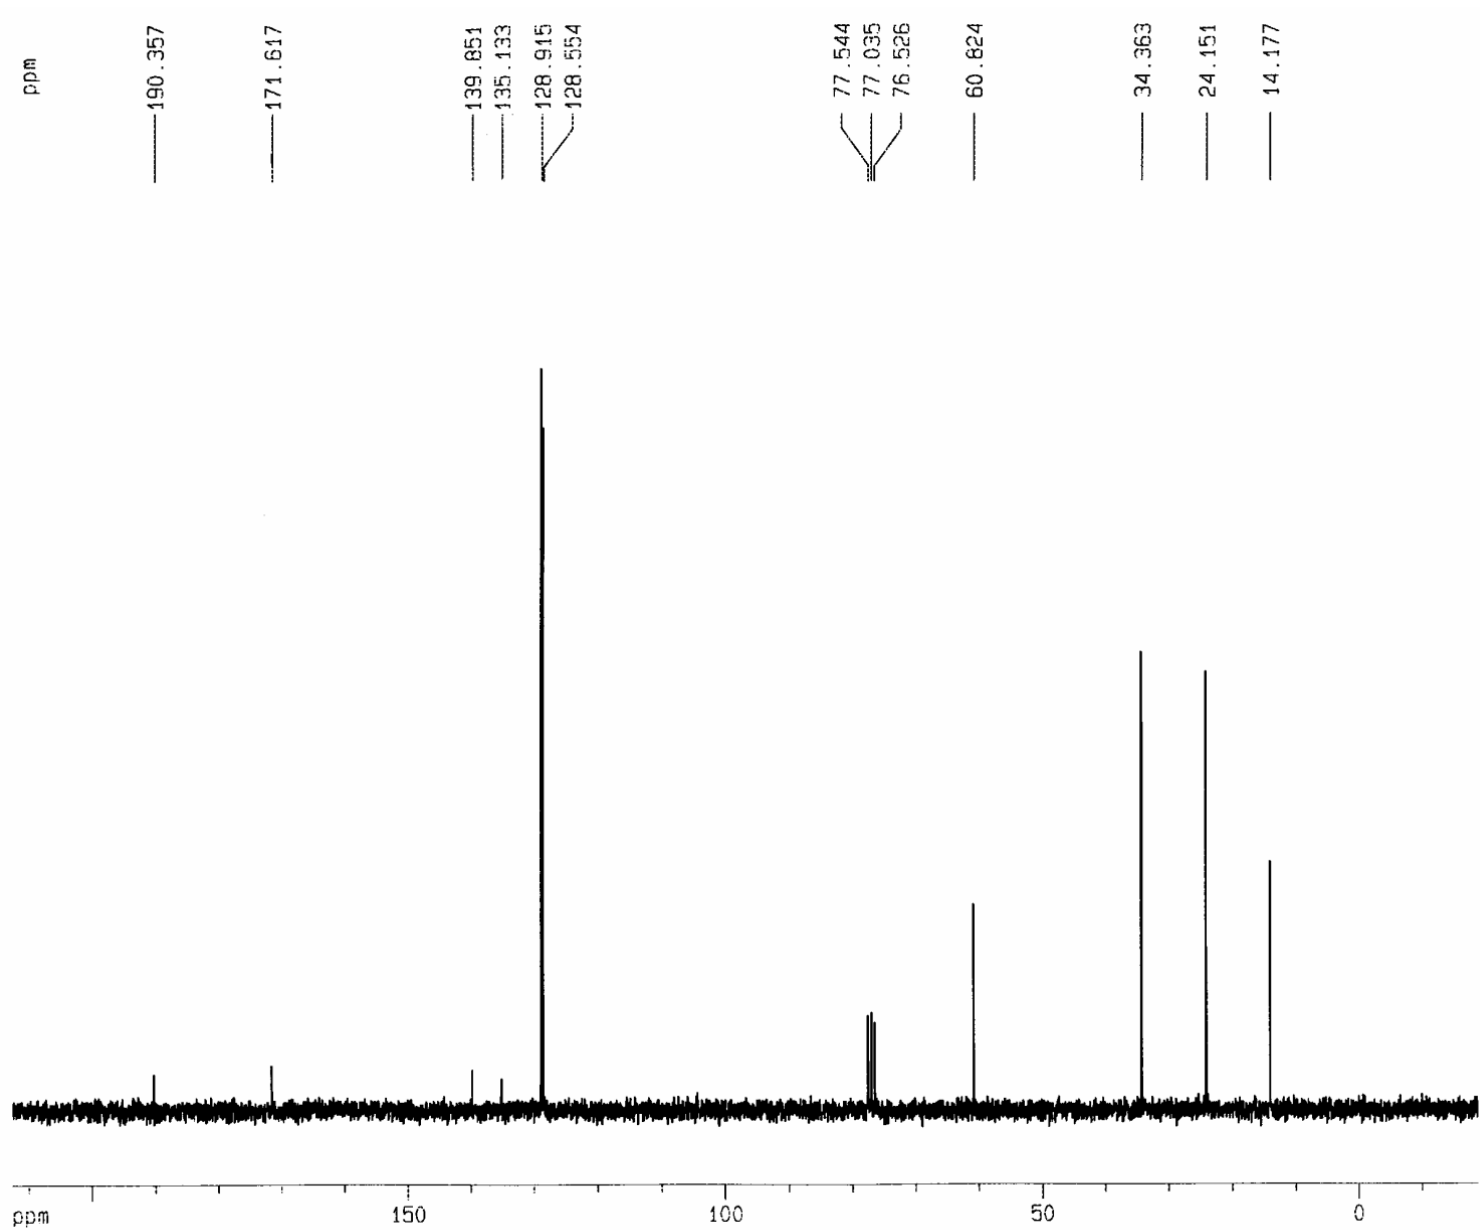

$^{13}\text{C}$  NMR spectrum of (11)

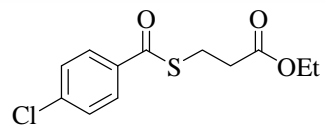

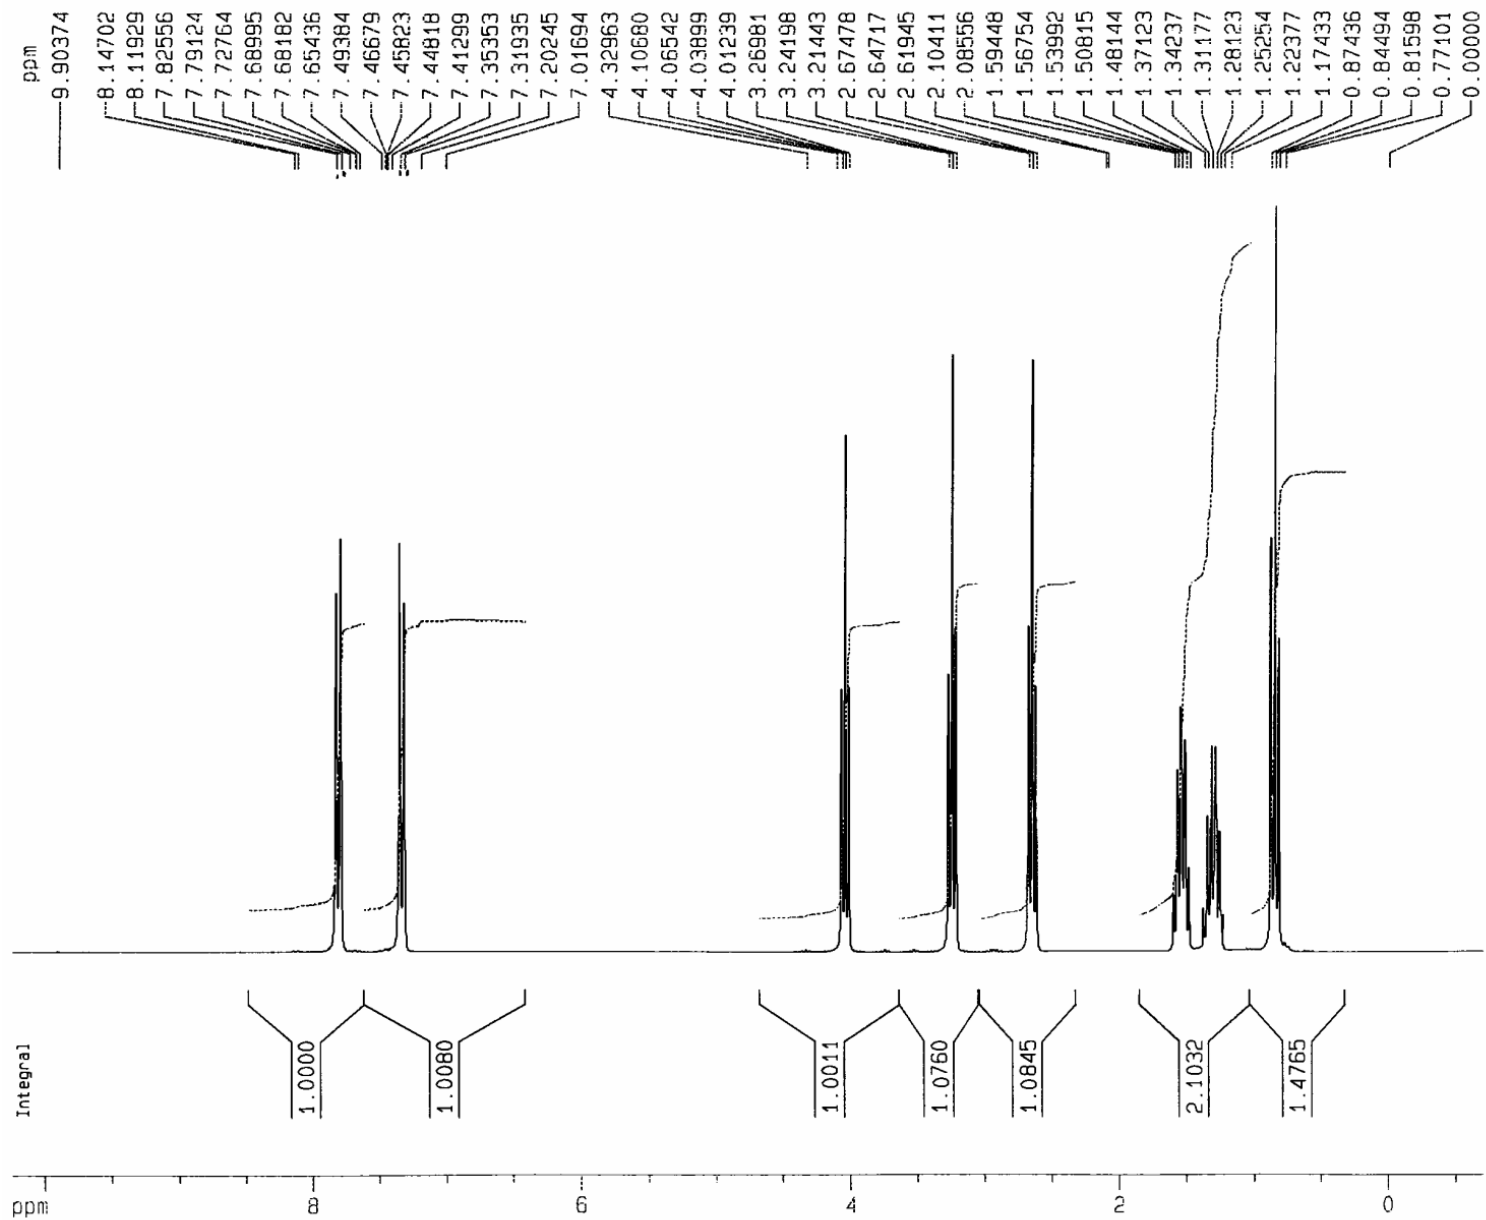

<sup>1</sup>H NMR spectrum of (12)

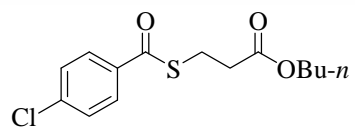



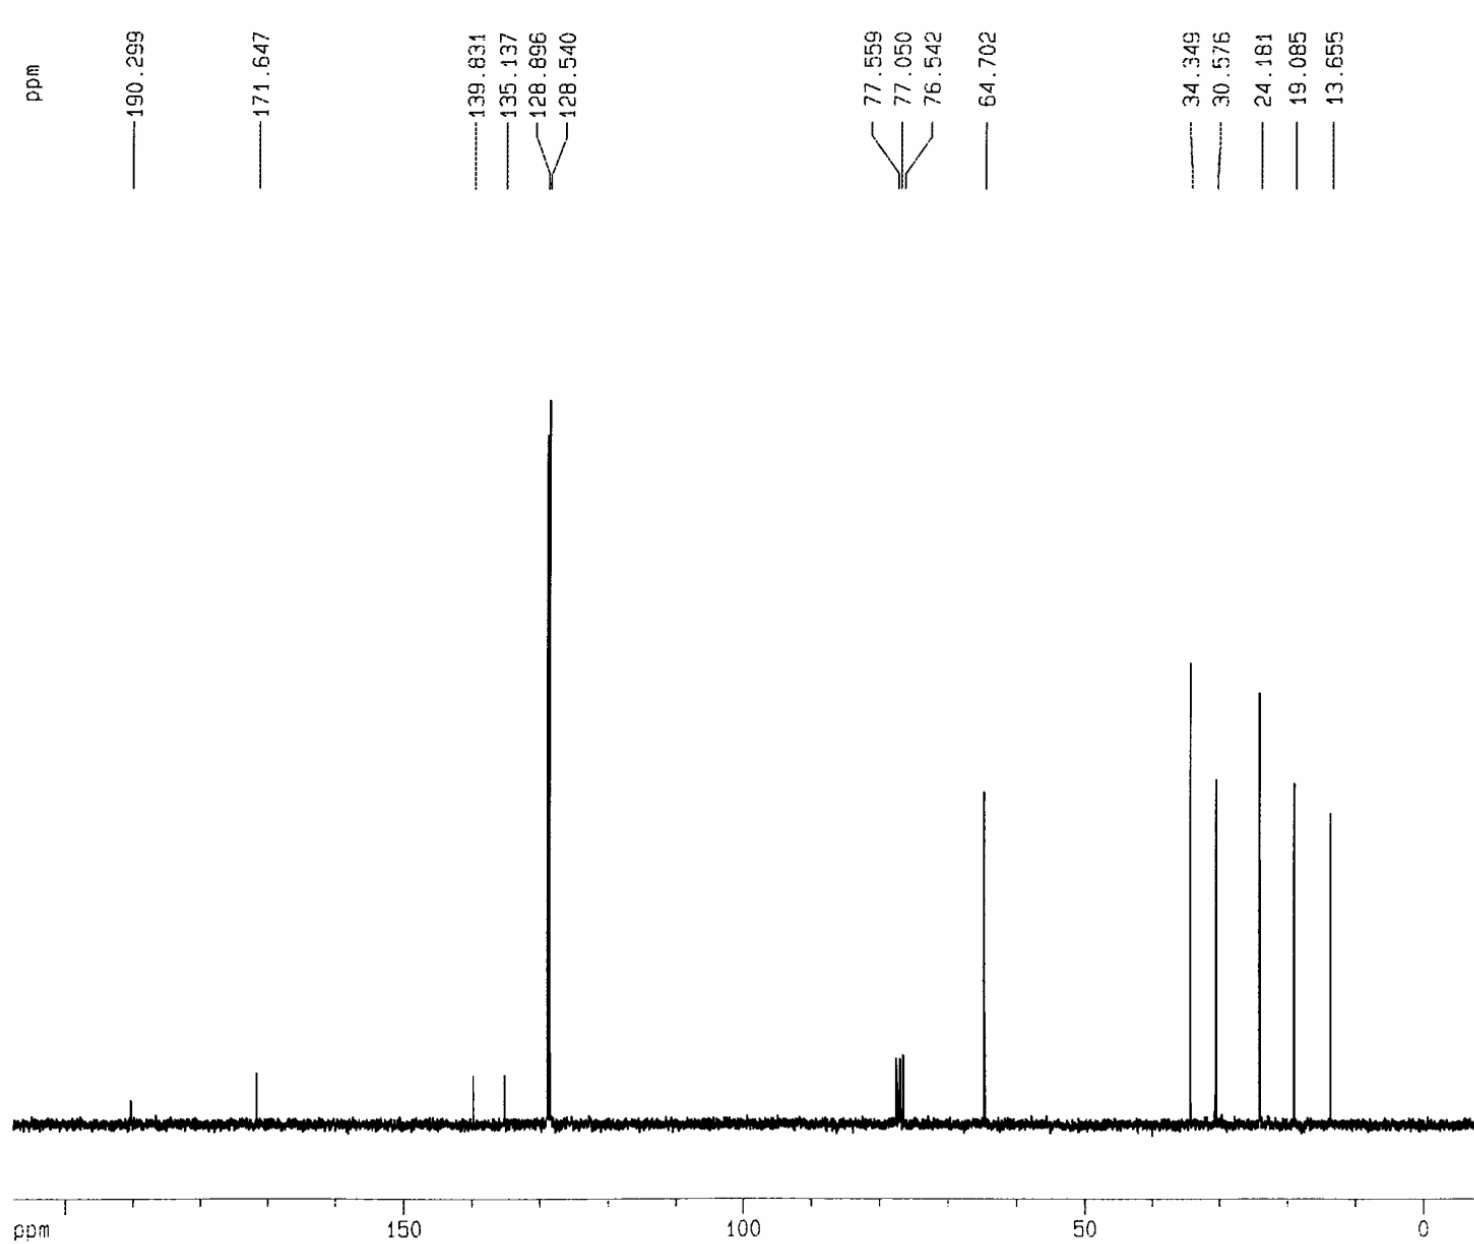

$^{13}\text{C}$  NMR spectrum of (12)

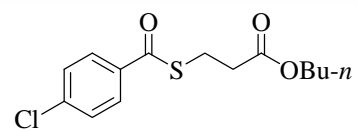

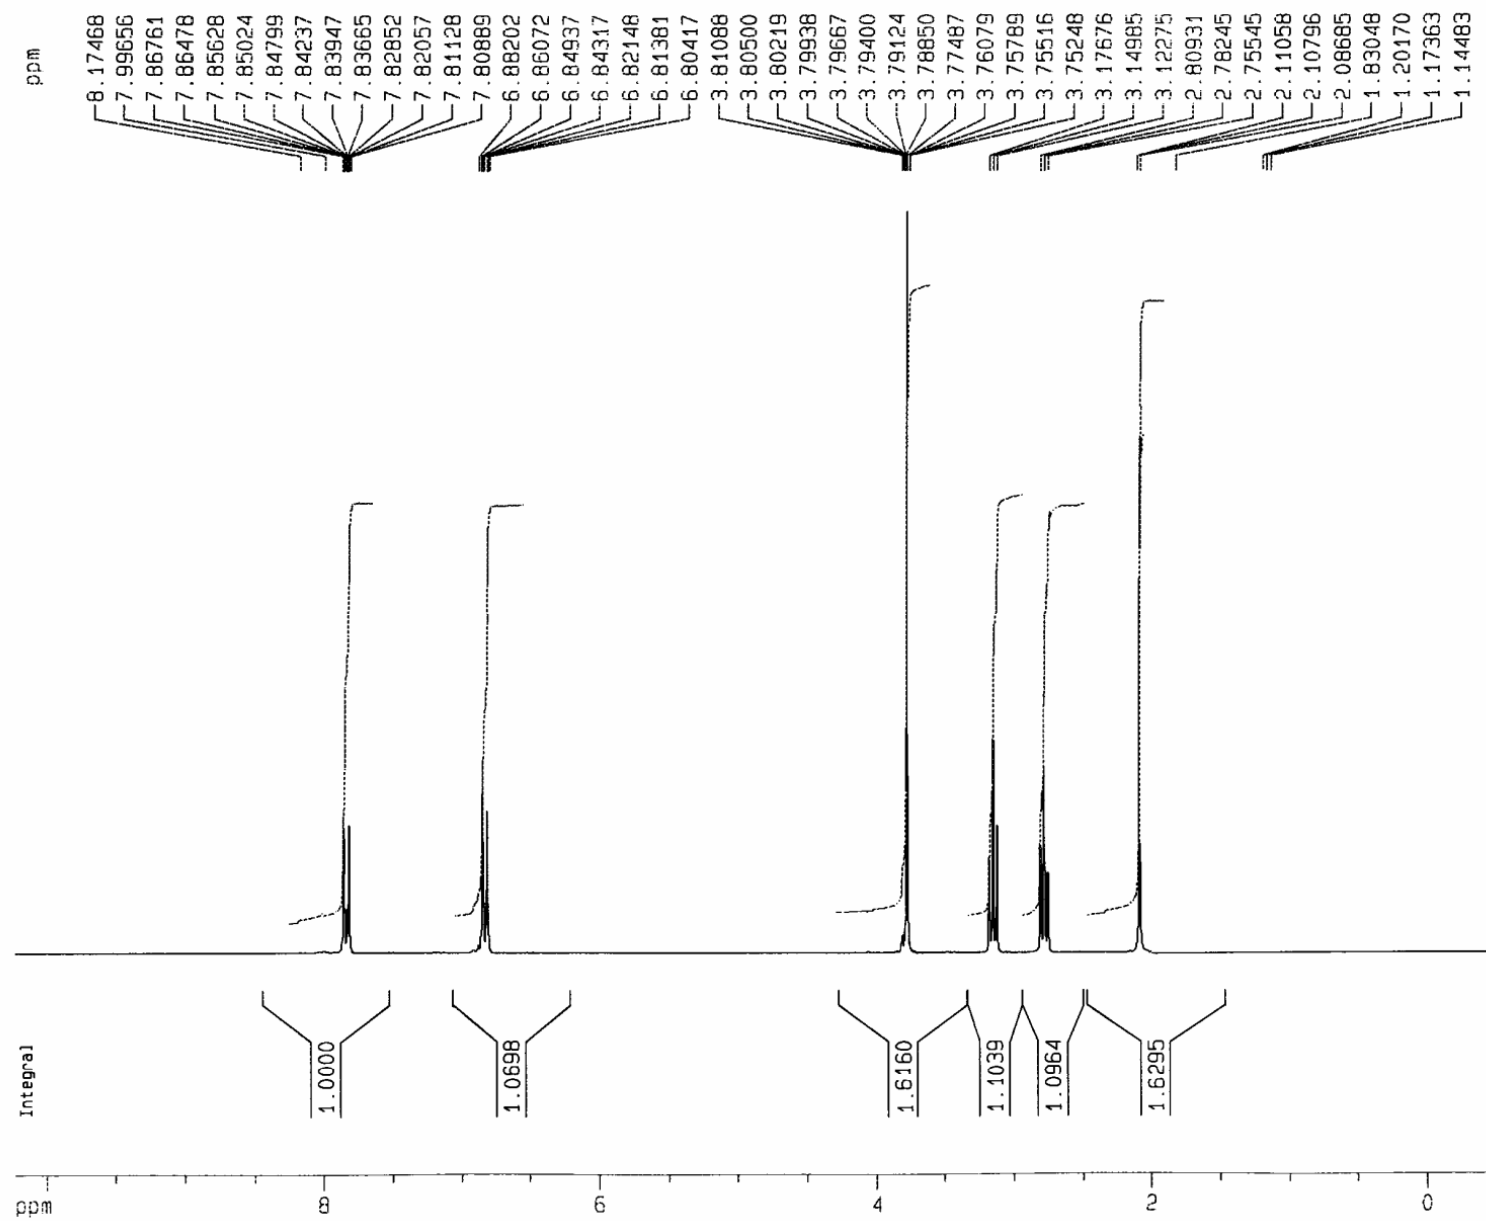

<sup>1</sup>H NMR spectrum of (13)

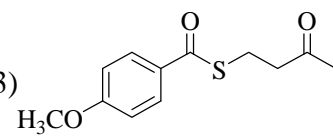

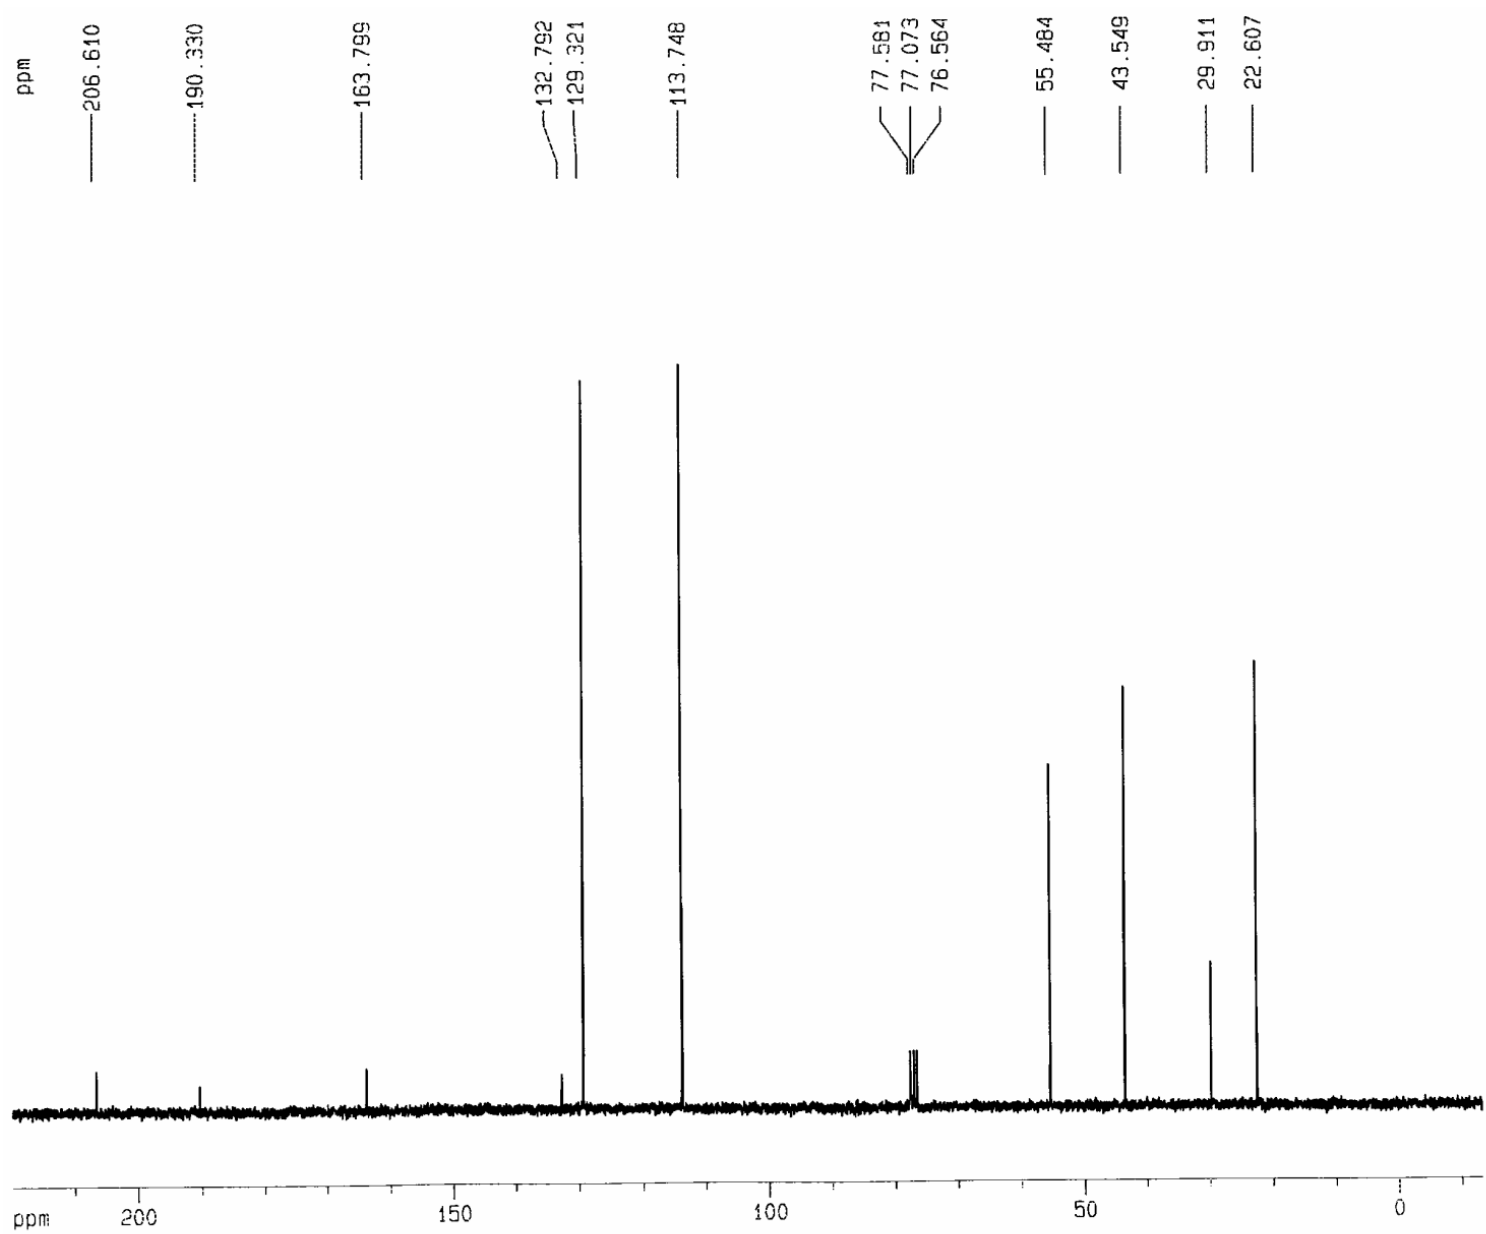

$^{13}\text{C}$  NMR spectrum of (13)

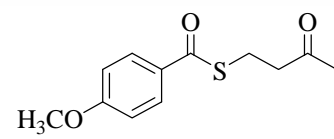

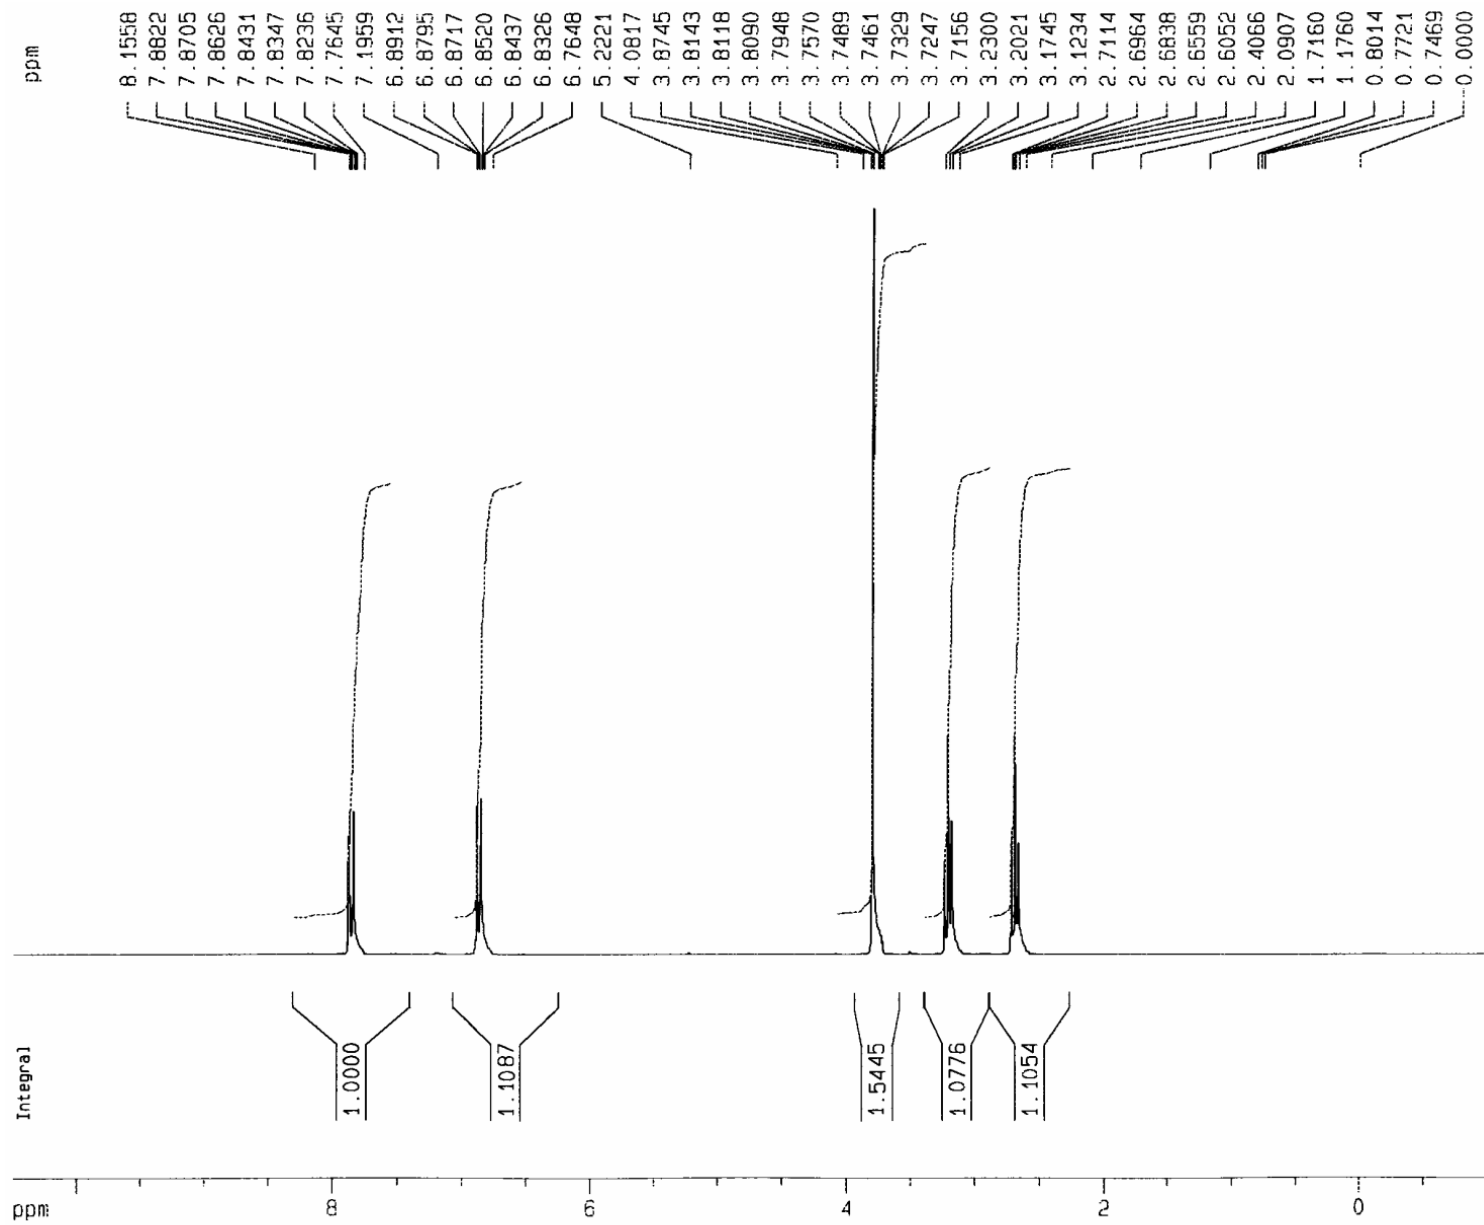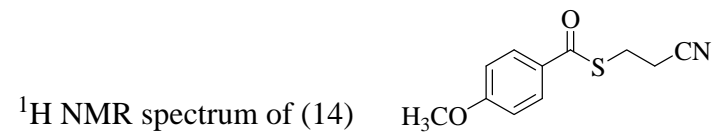

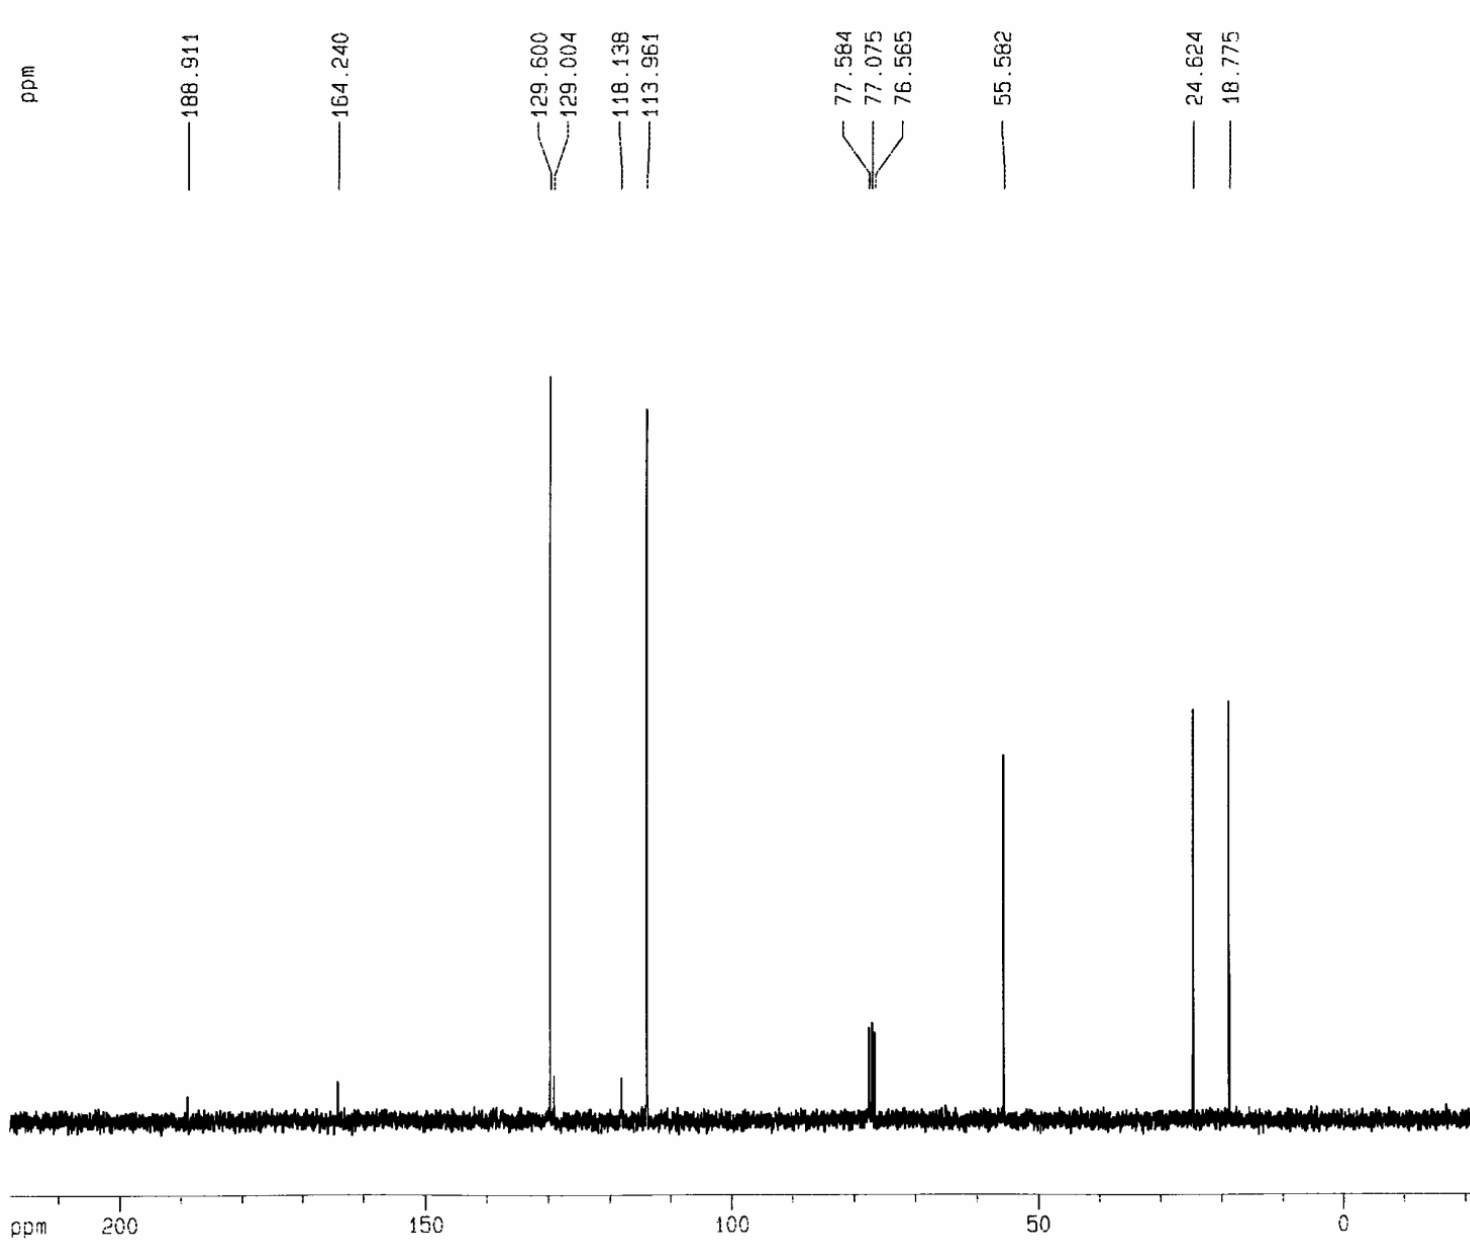

$^{13}\text{C}$  NMR spectrum of (14)

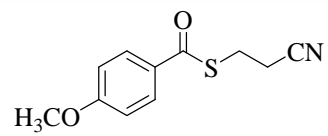

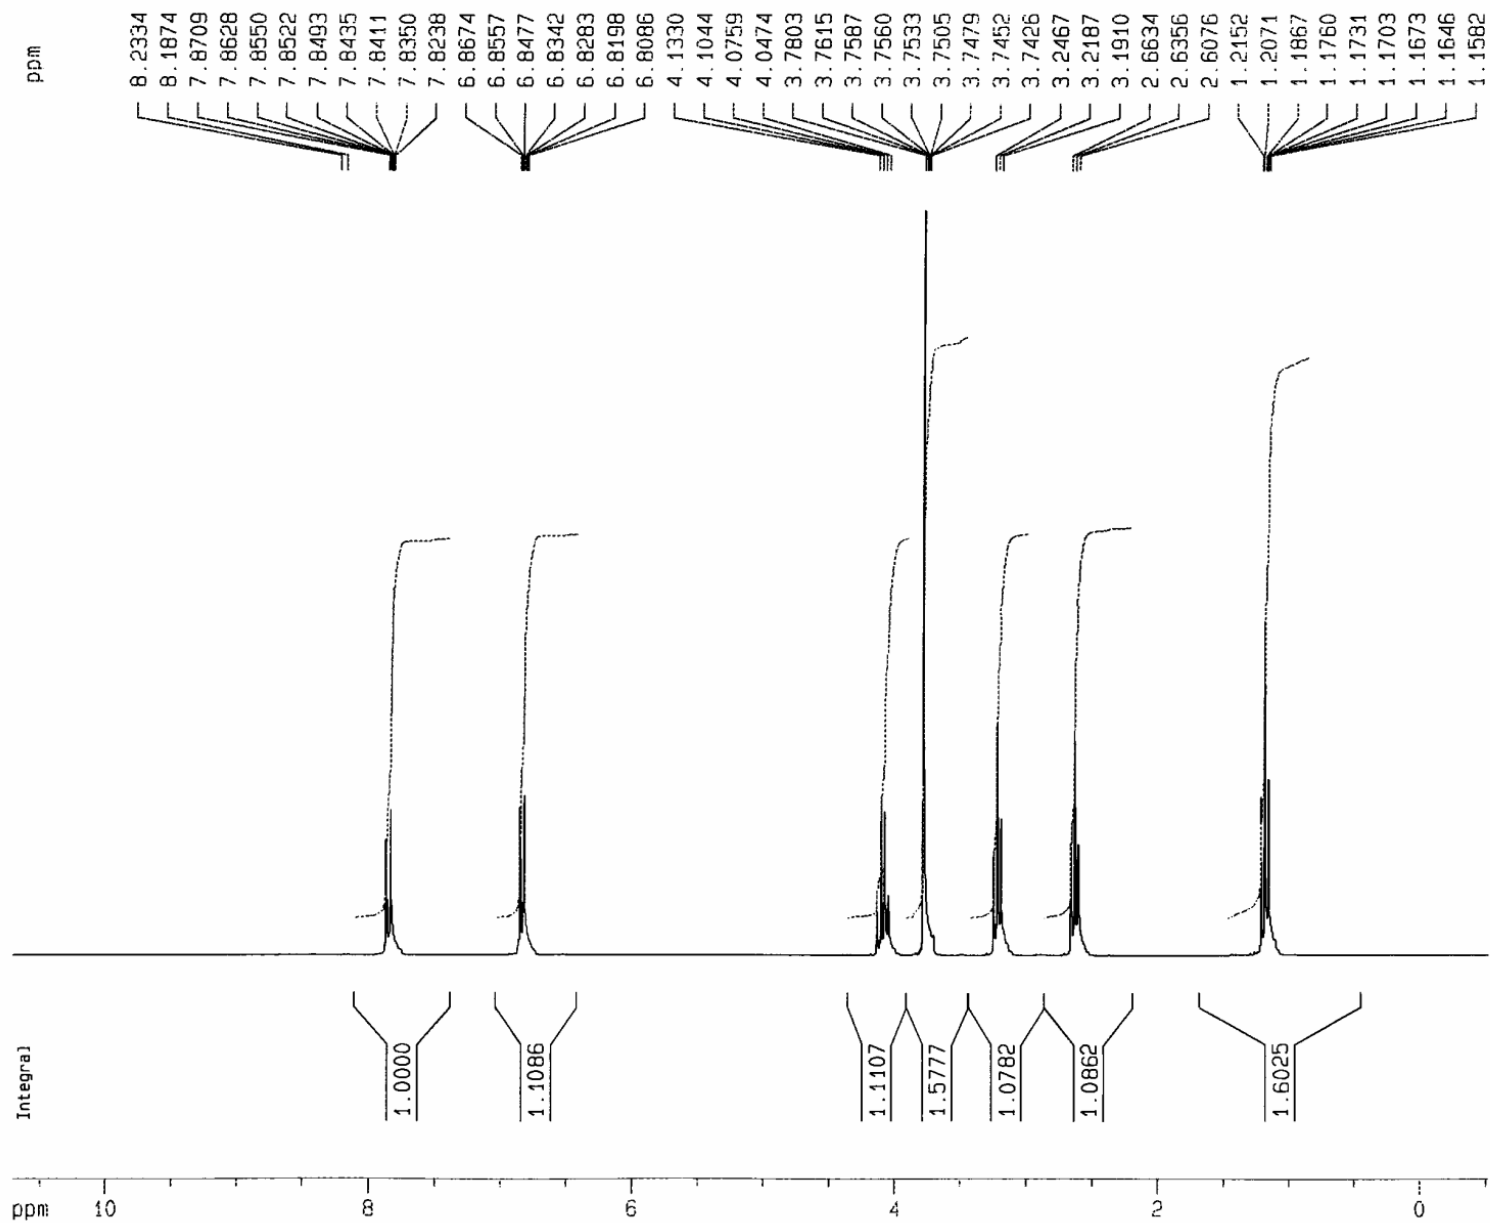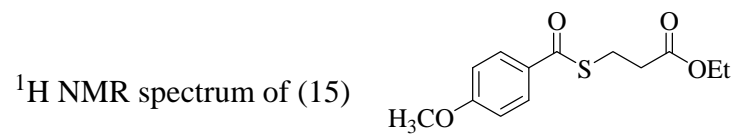

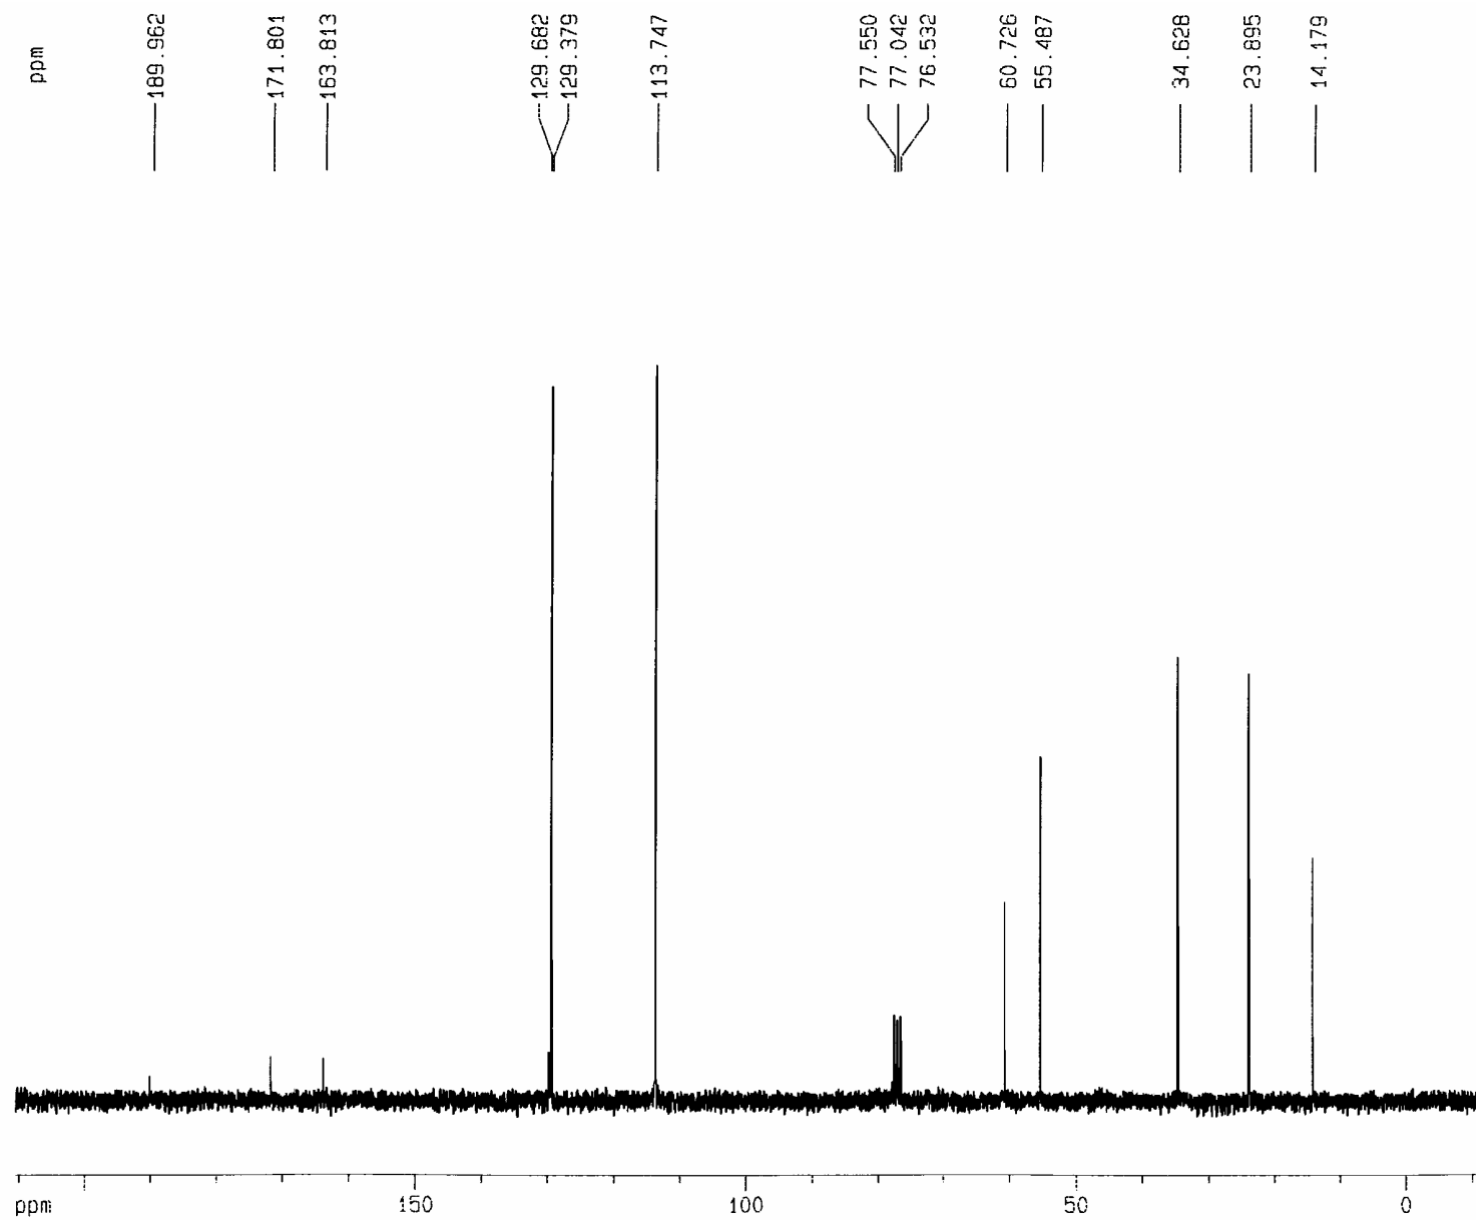

$^{13}\text{C}$  NMR spectrum of (15)

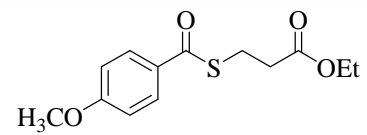

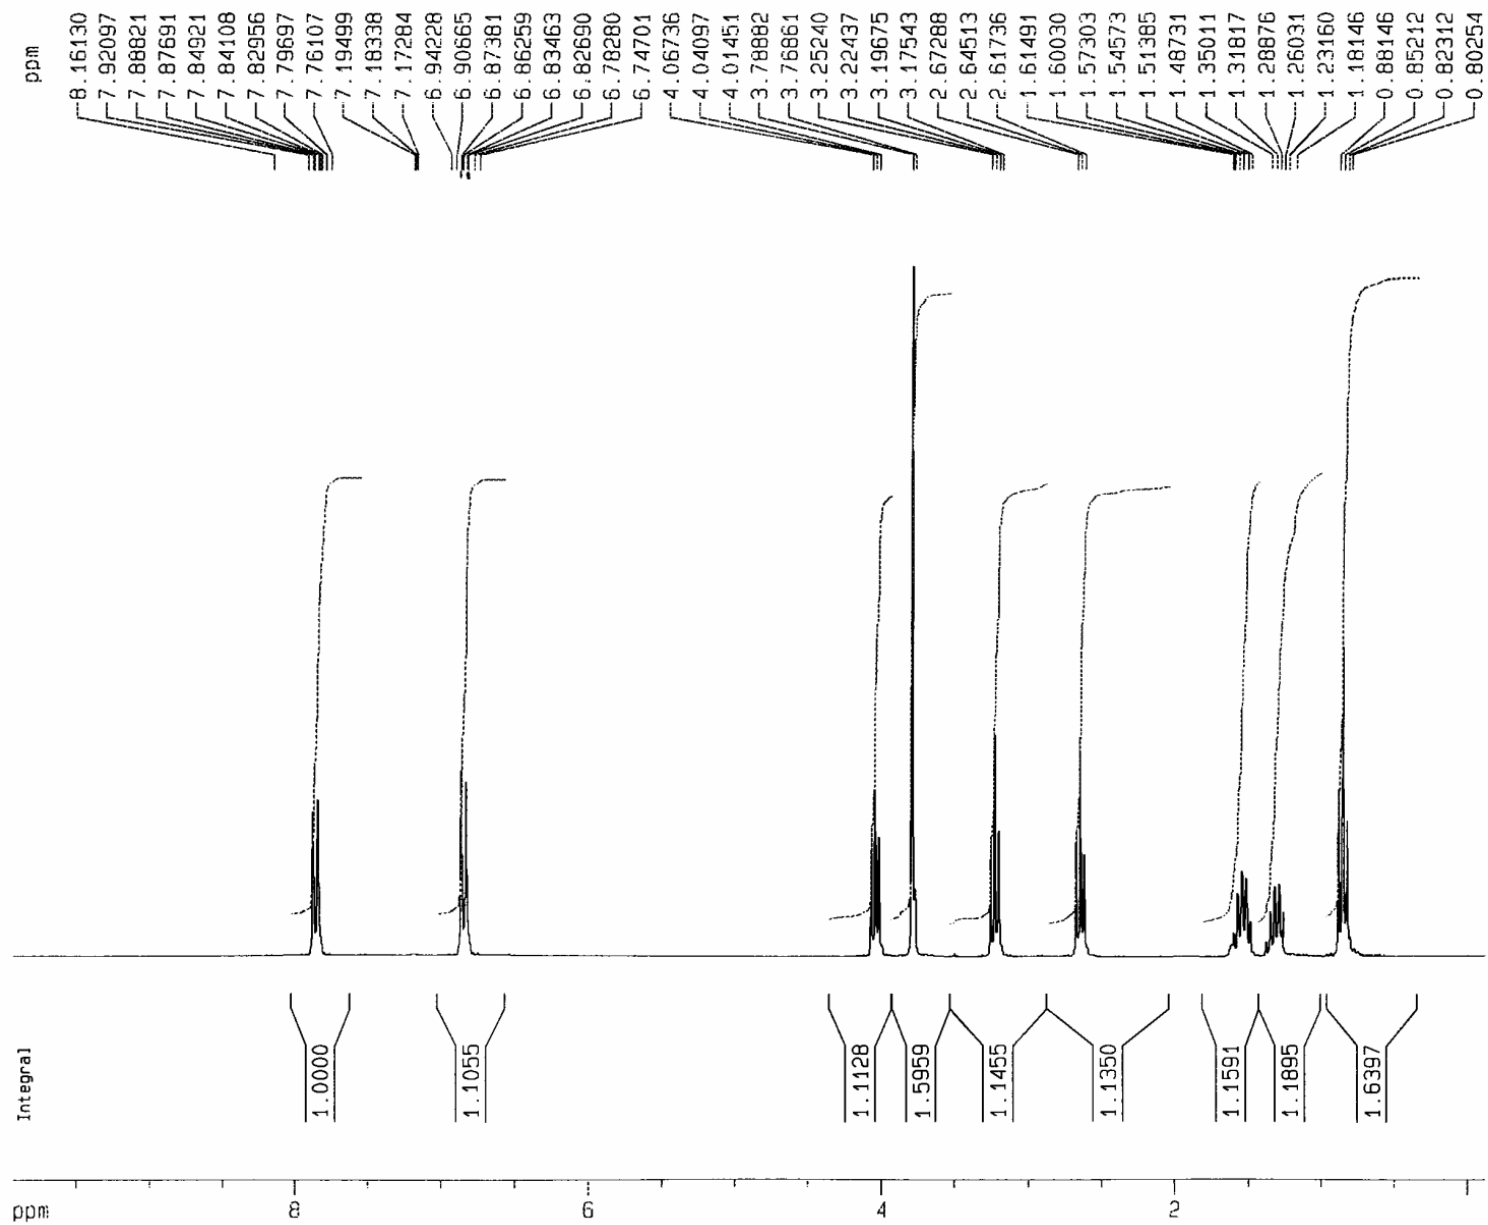

<sup>1</sup>H NMR spectrum of (16)

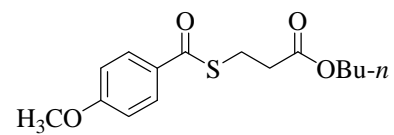



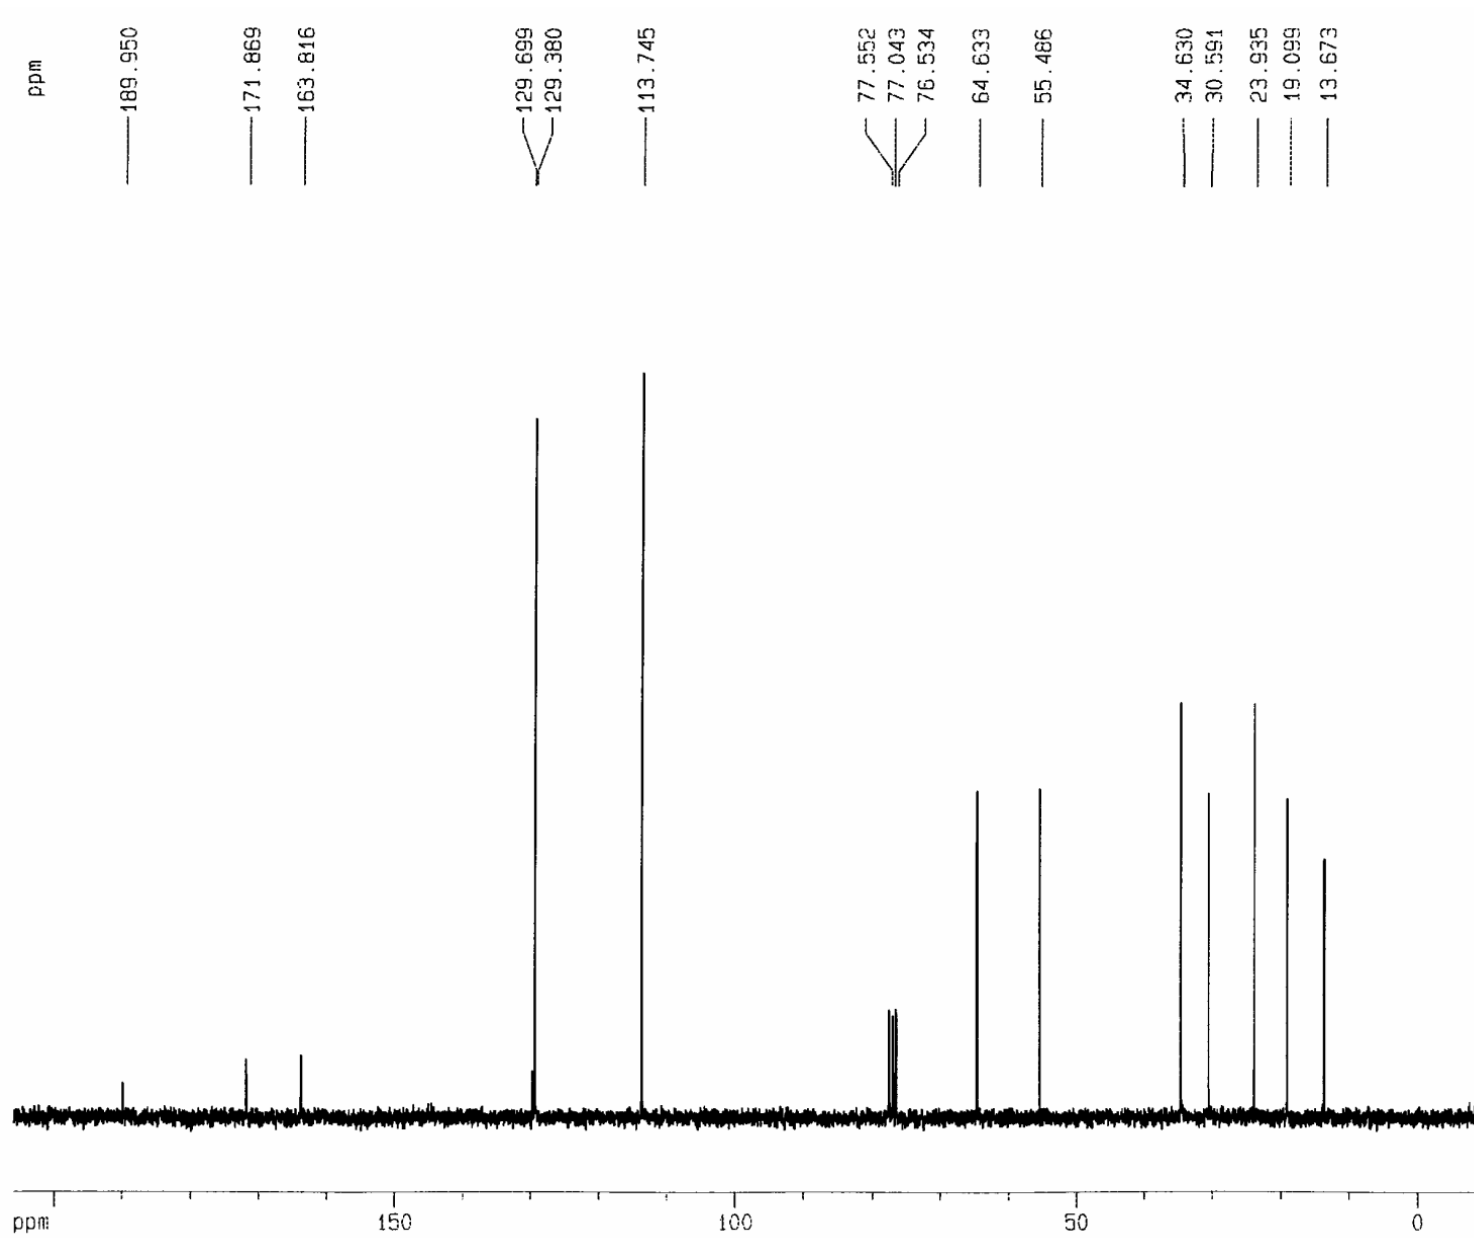

$^{13}\text{C}$  NMR spectrum of (16)

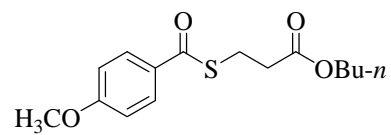

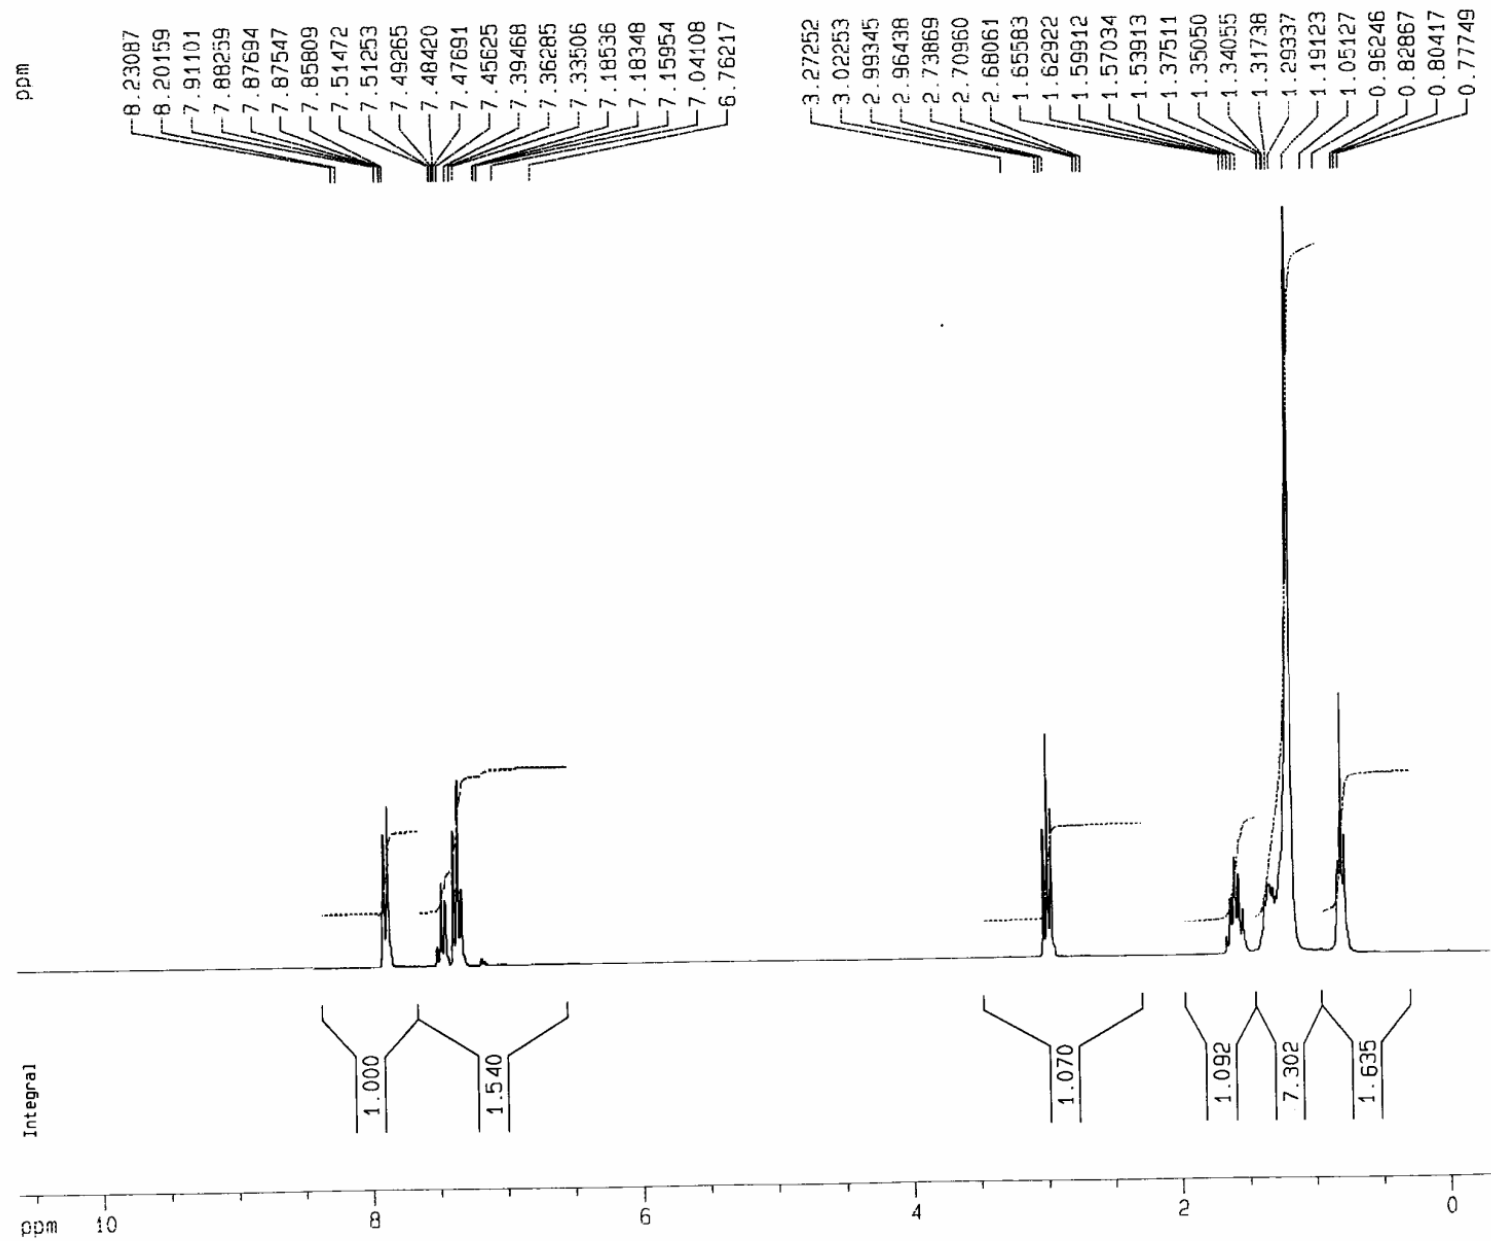

<sup>1</sup>H NMR spectrum of (17) CCCCCCCCCCCC(=O)c1ccccc1

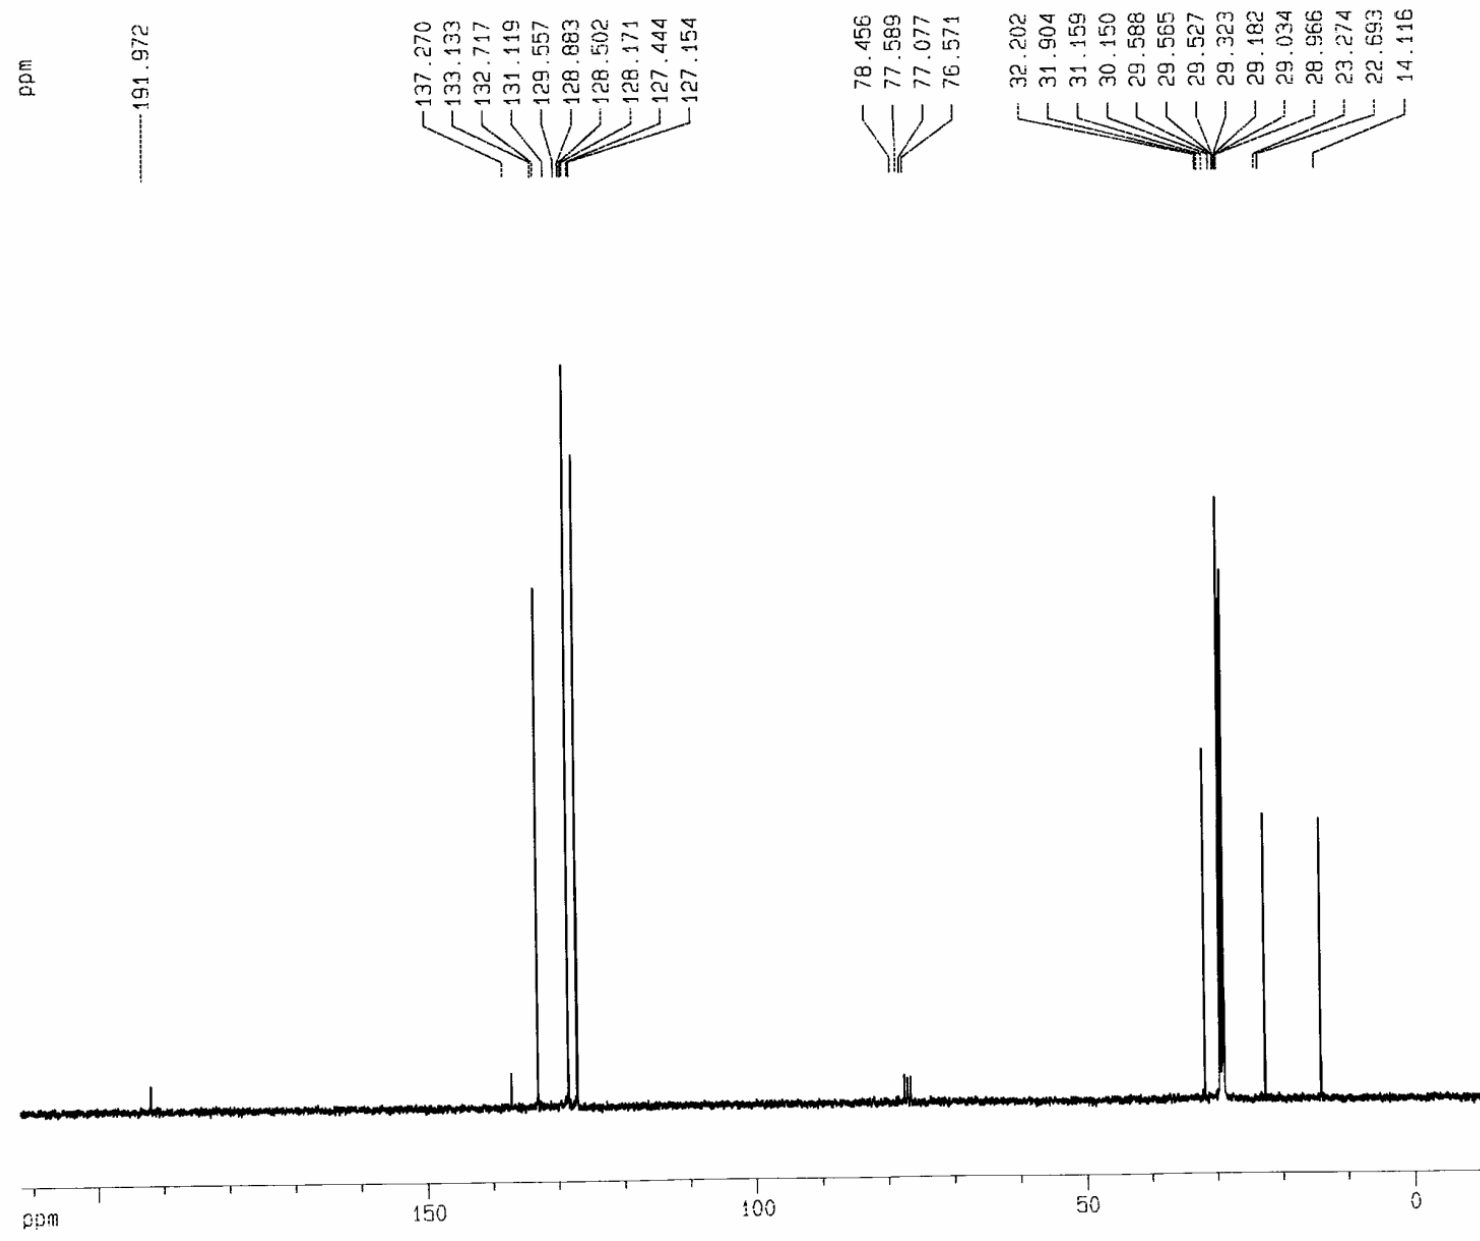

<sup>13</sup>C NMR spectrum of (17)

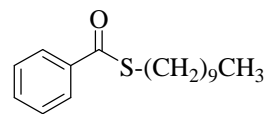

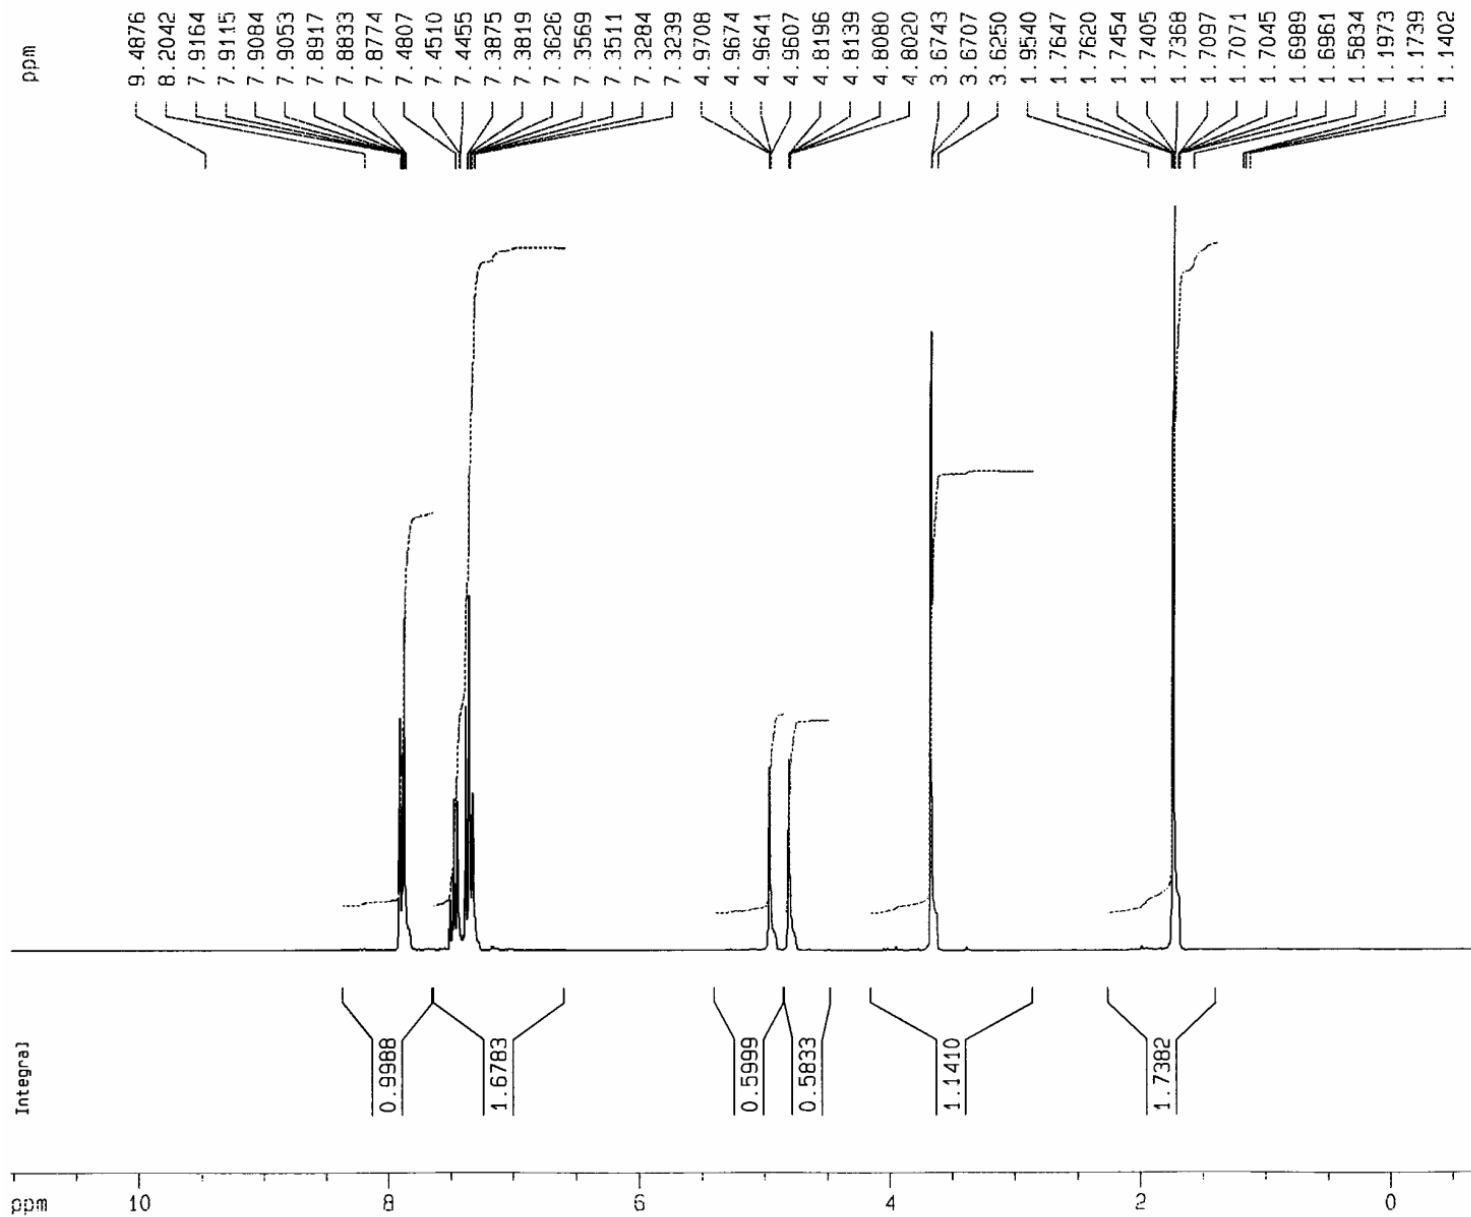

<sup>1</sup>H NMR spectrum of (18)

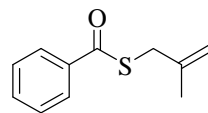

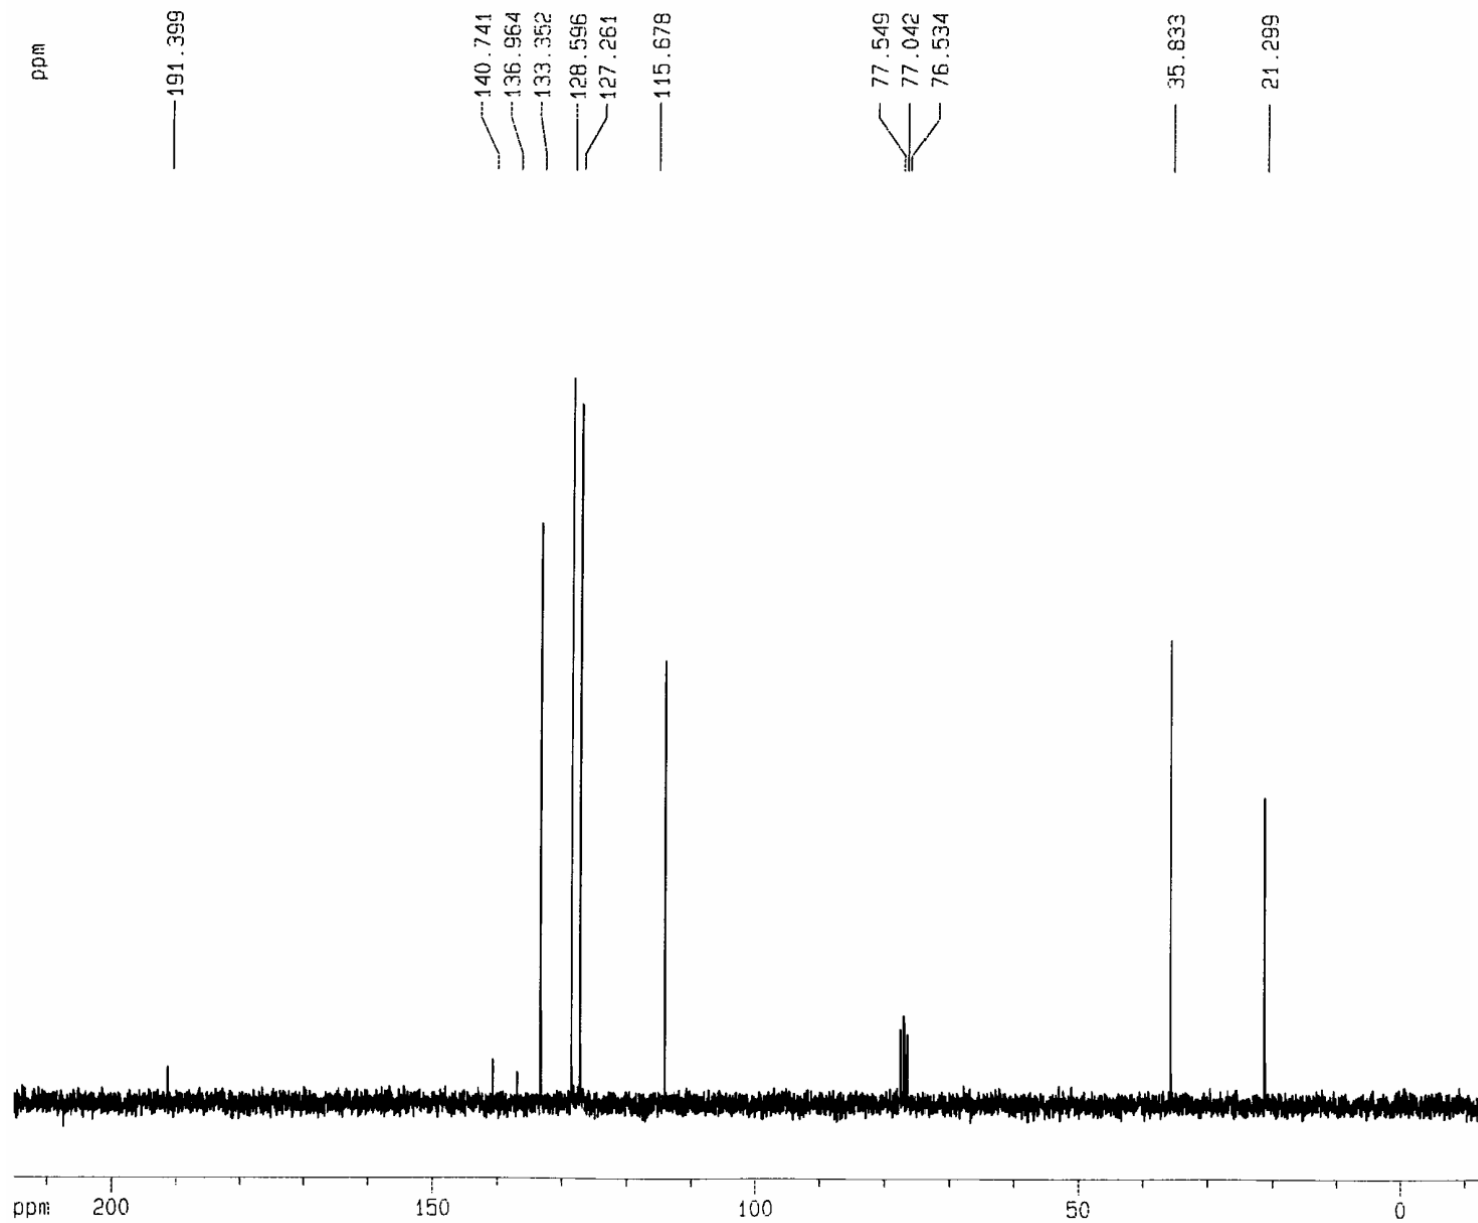

$^{13}\text{C}$  NMR spectrum of (18)

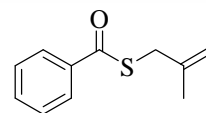

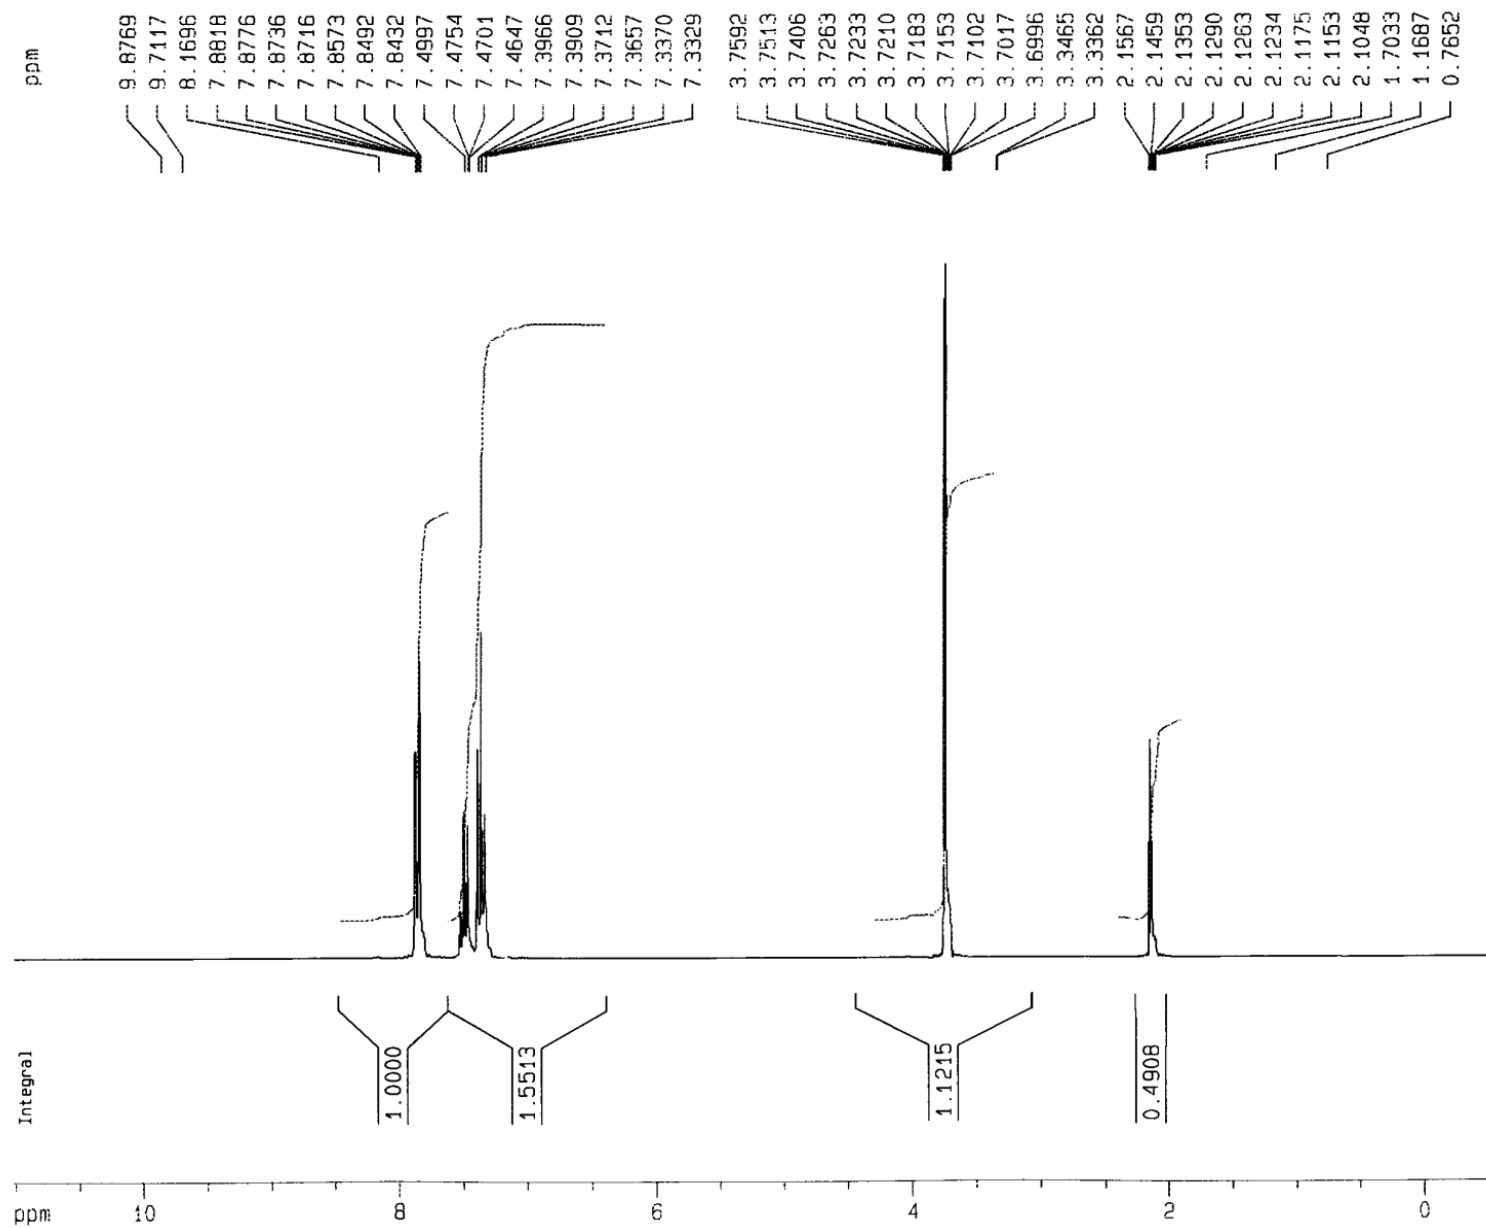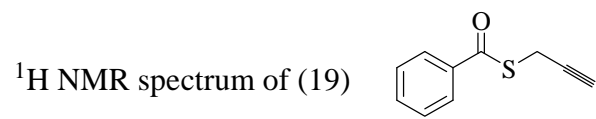

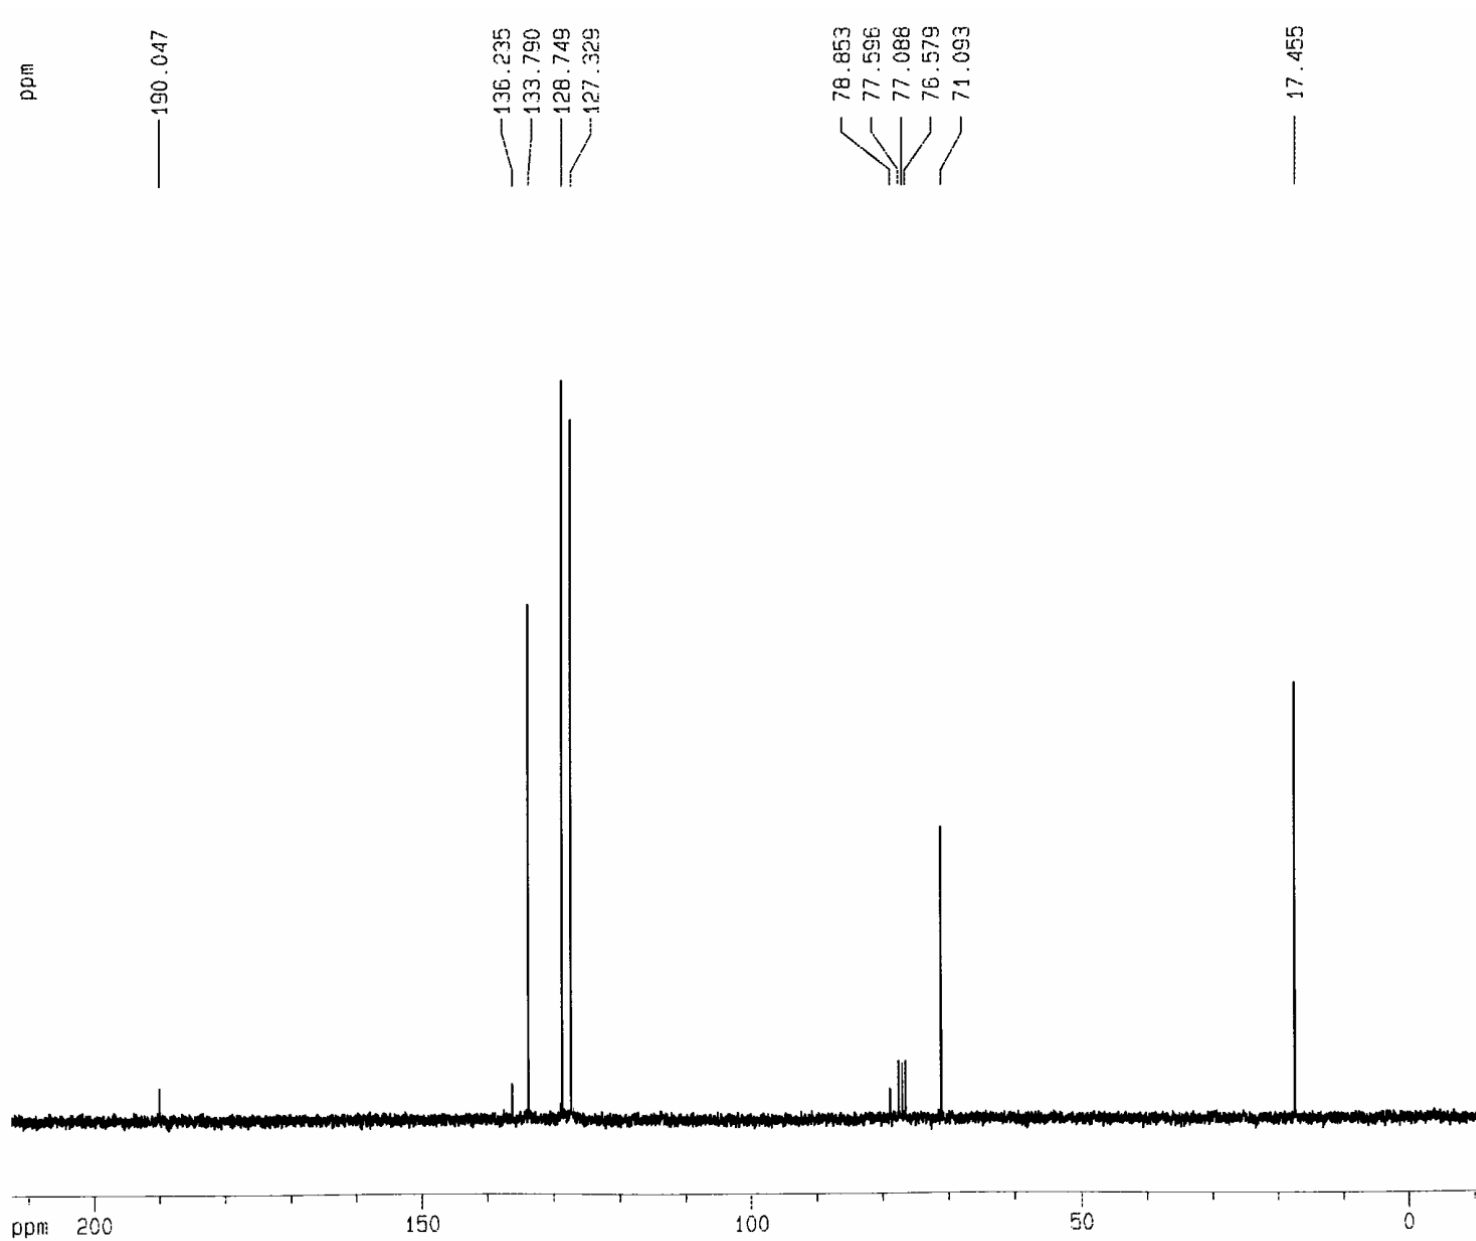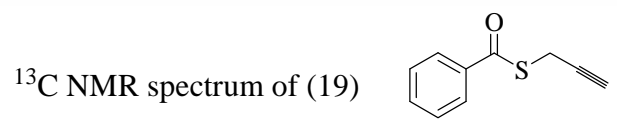

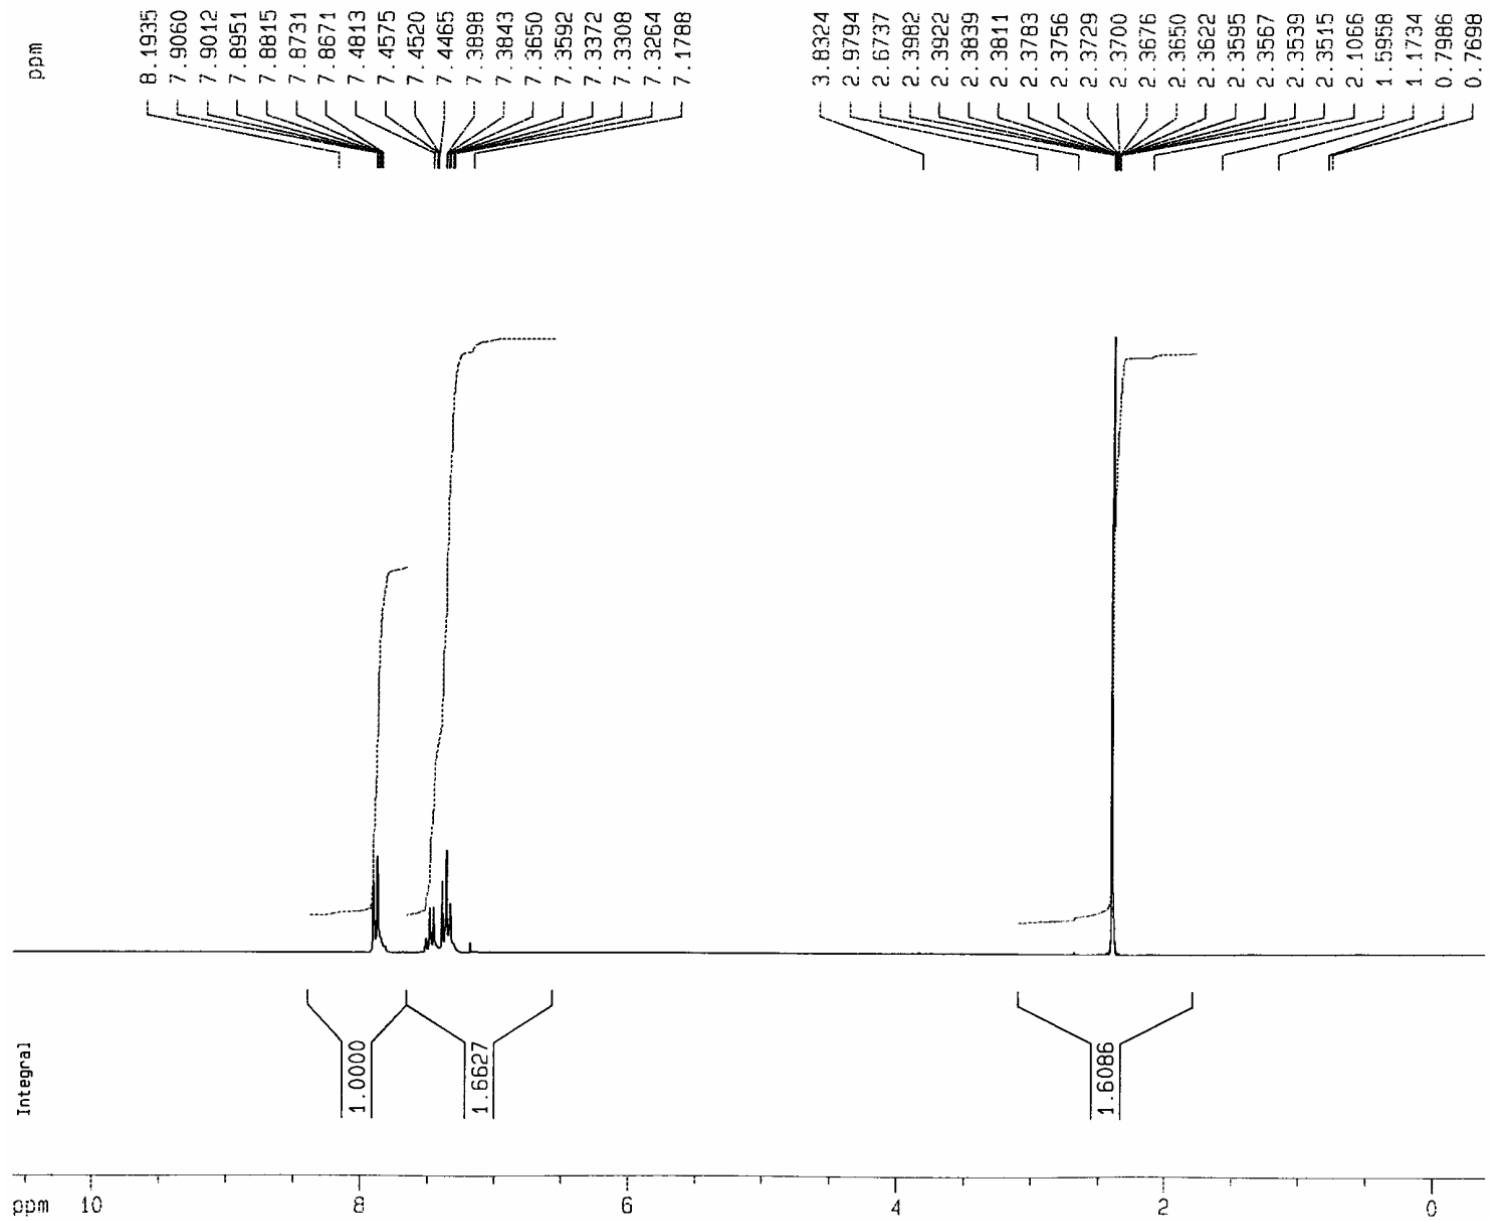

$^1\text{H}$  NMR spectrum of (20) CC(=O)c1ccccc1



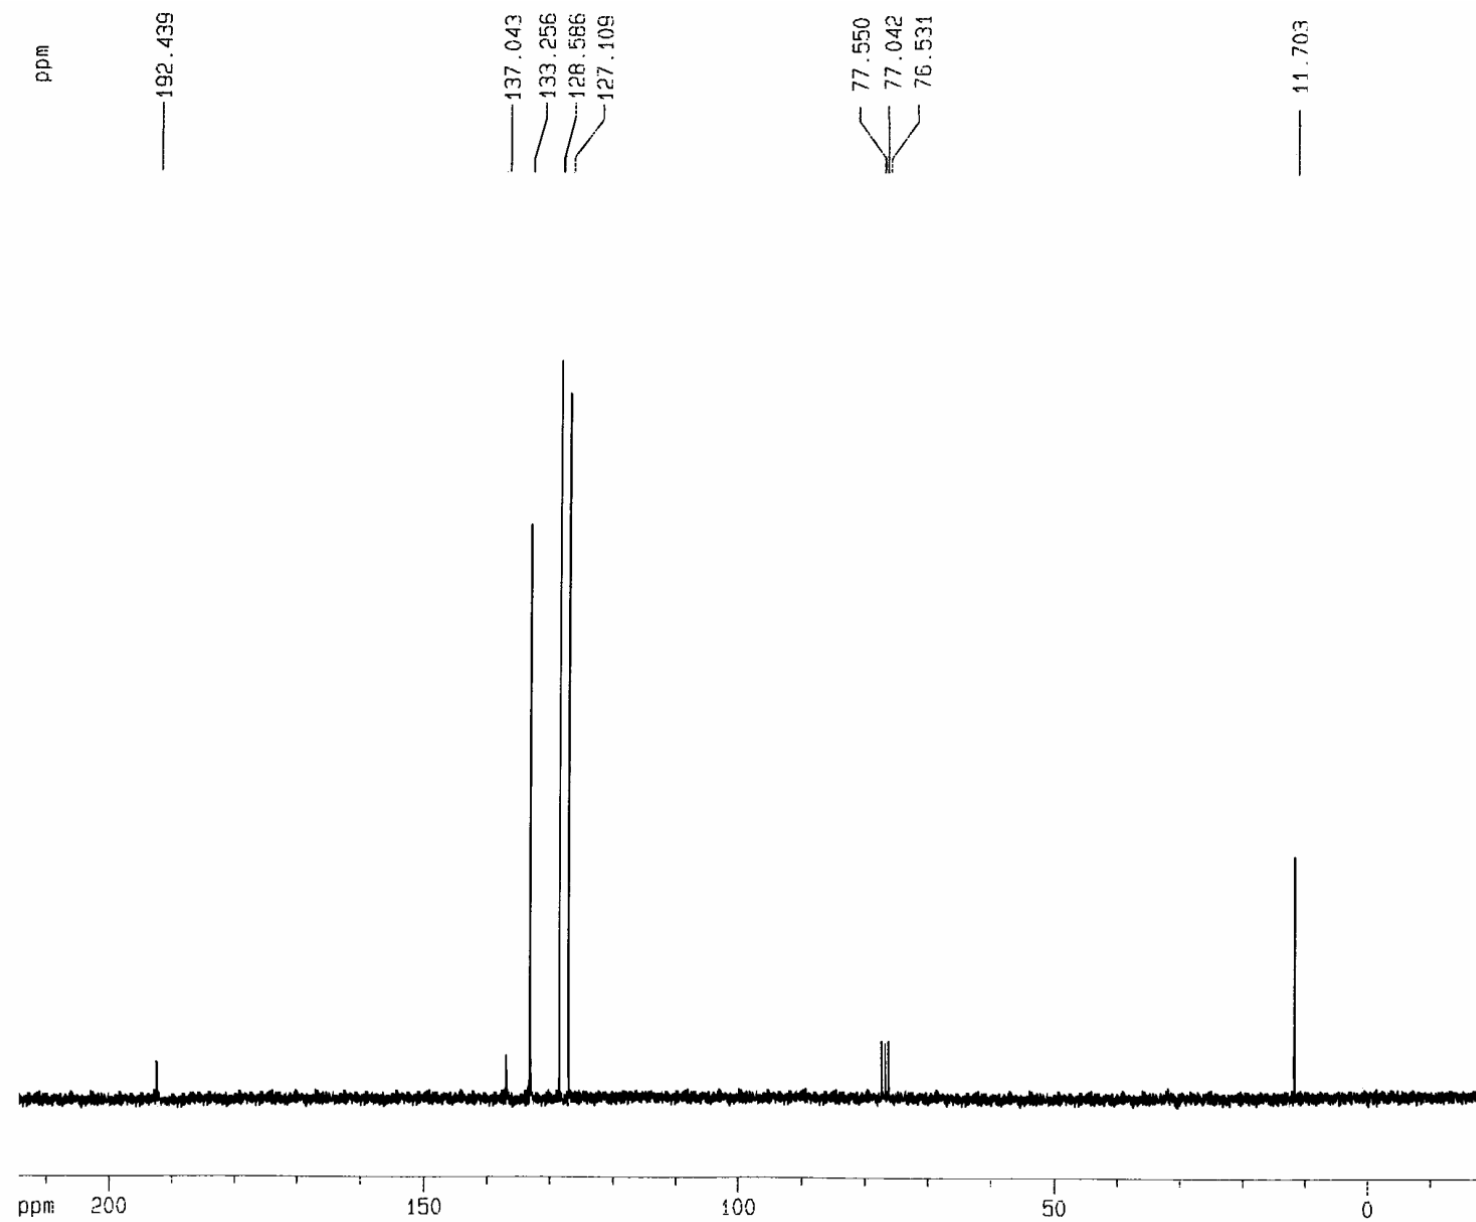

$^{13}\text{C}$  NMR spectrum of (20)

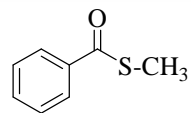

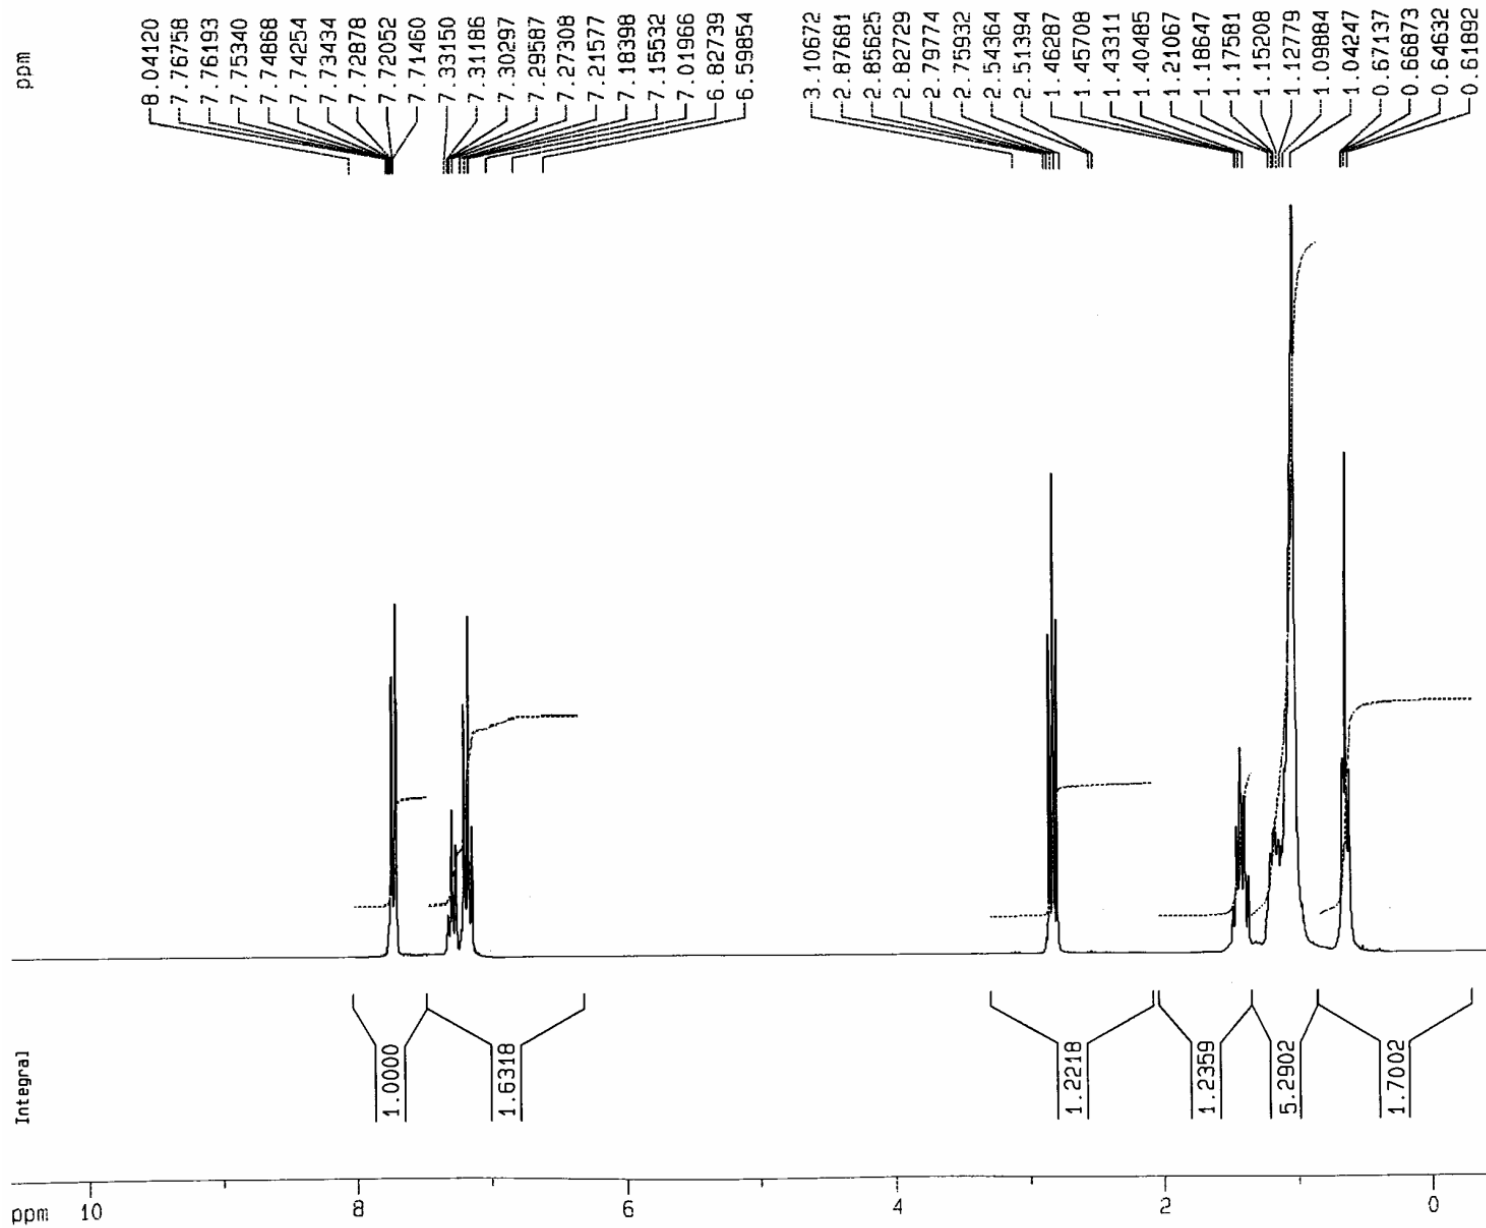

<sup>1</sup>H NMR spectrum of (21) CCCCCCCCSC(=O)c1ccccc1

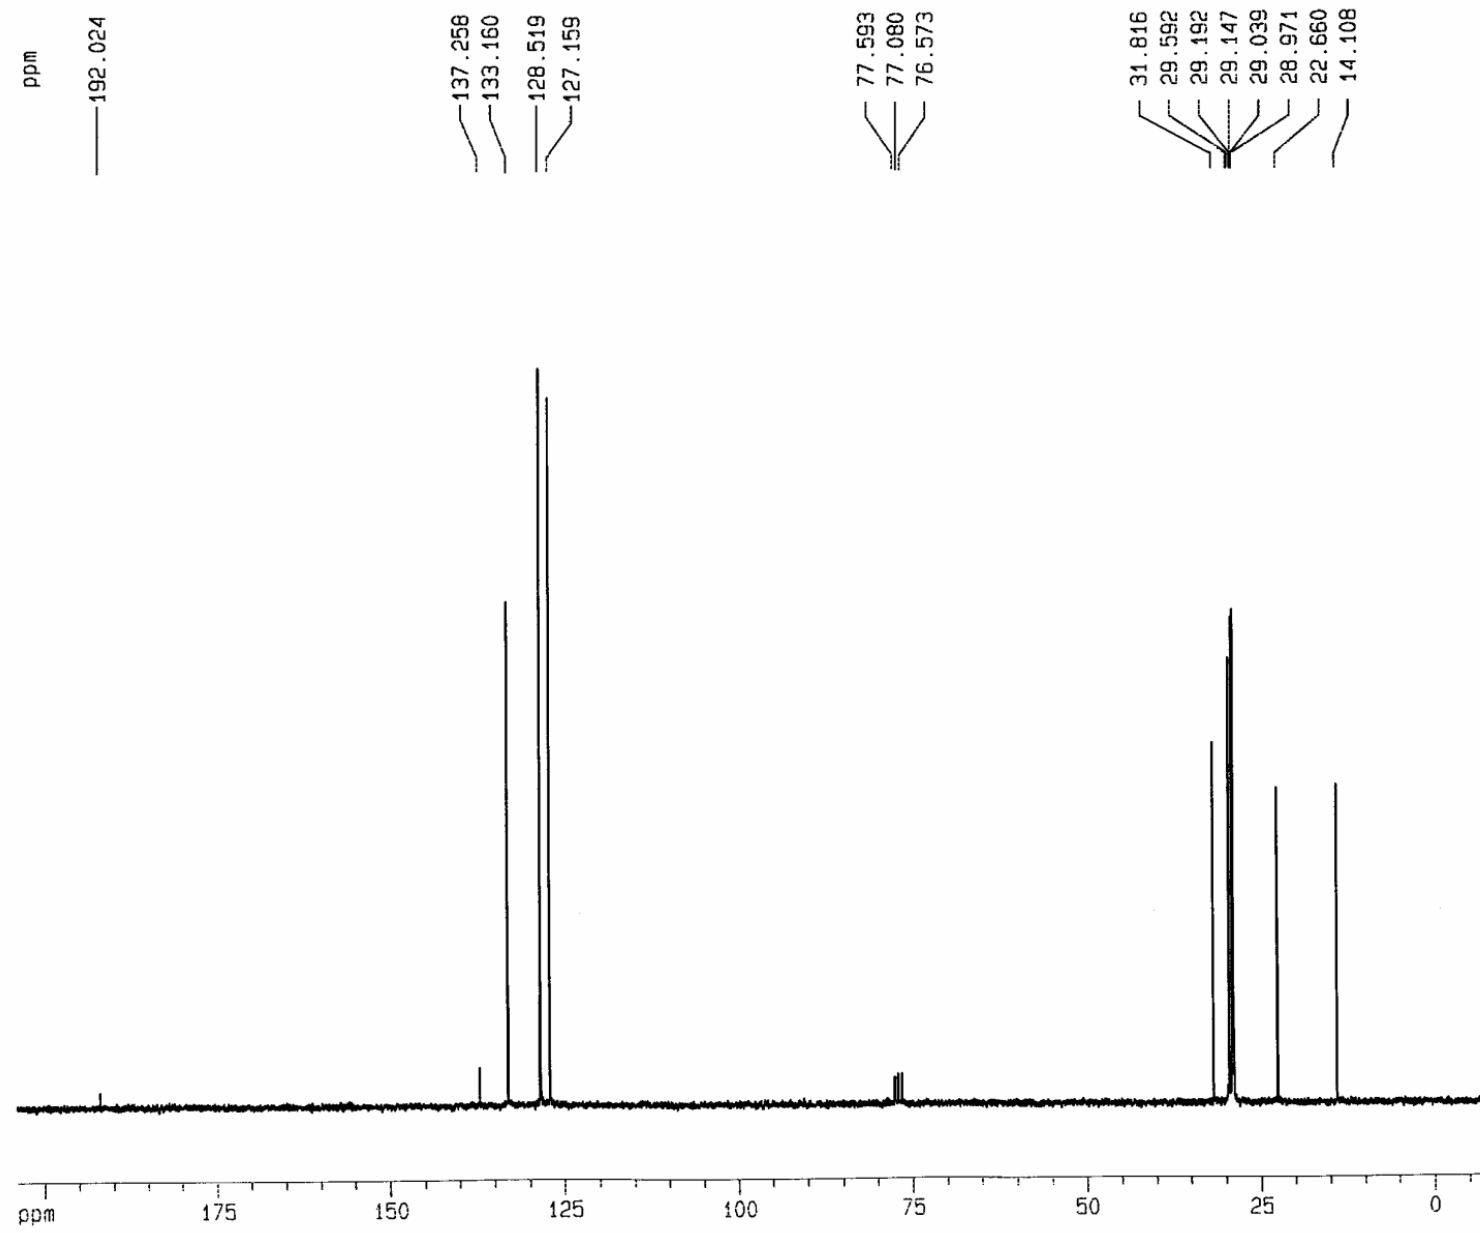

$^{13}\text{C}$  NMR spectrum of (21) CCCCCCCCSC(=O)c1ccccc1

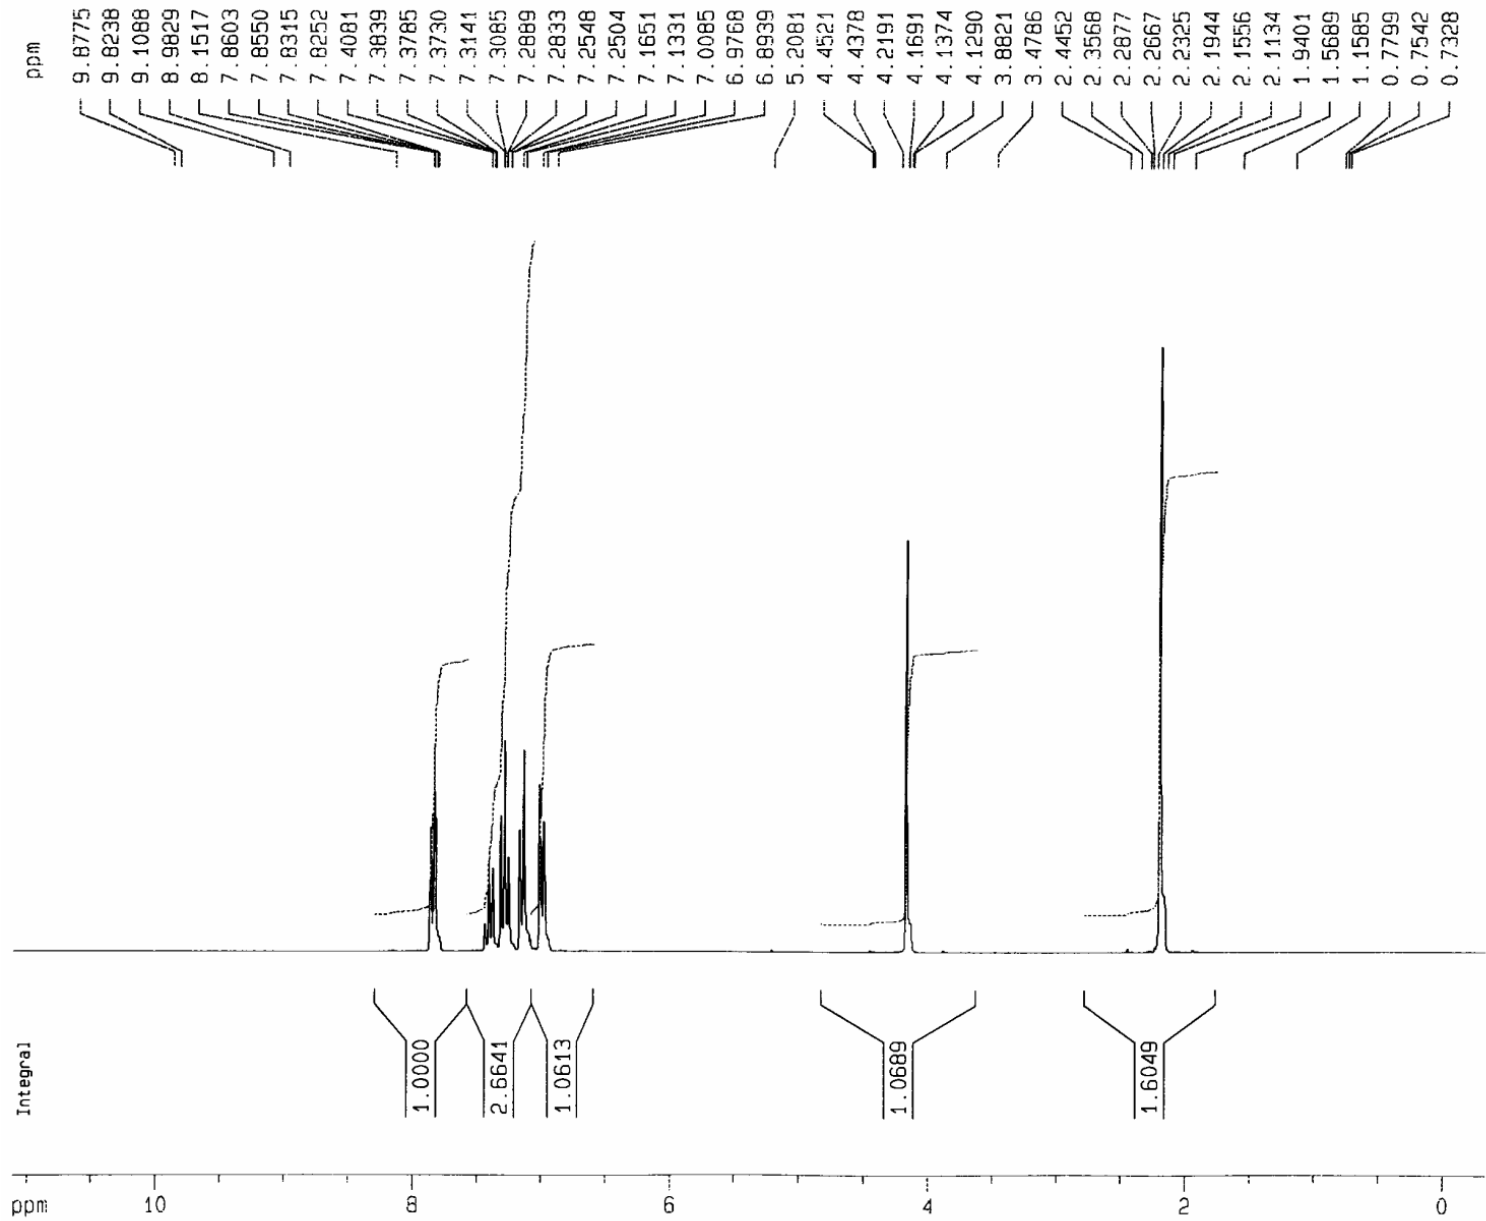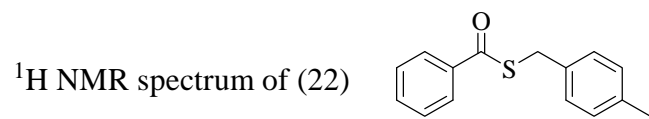

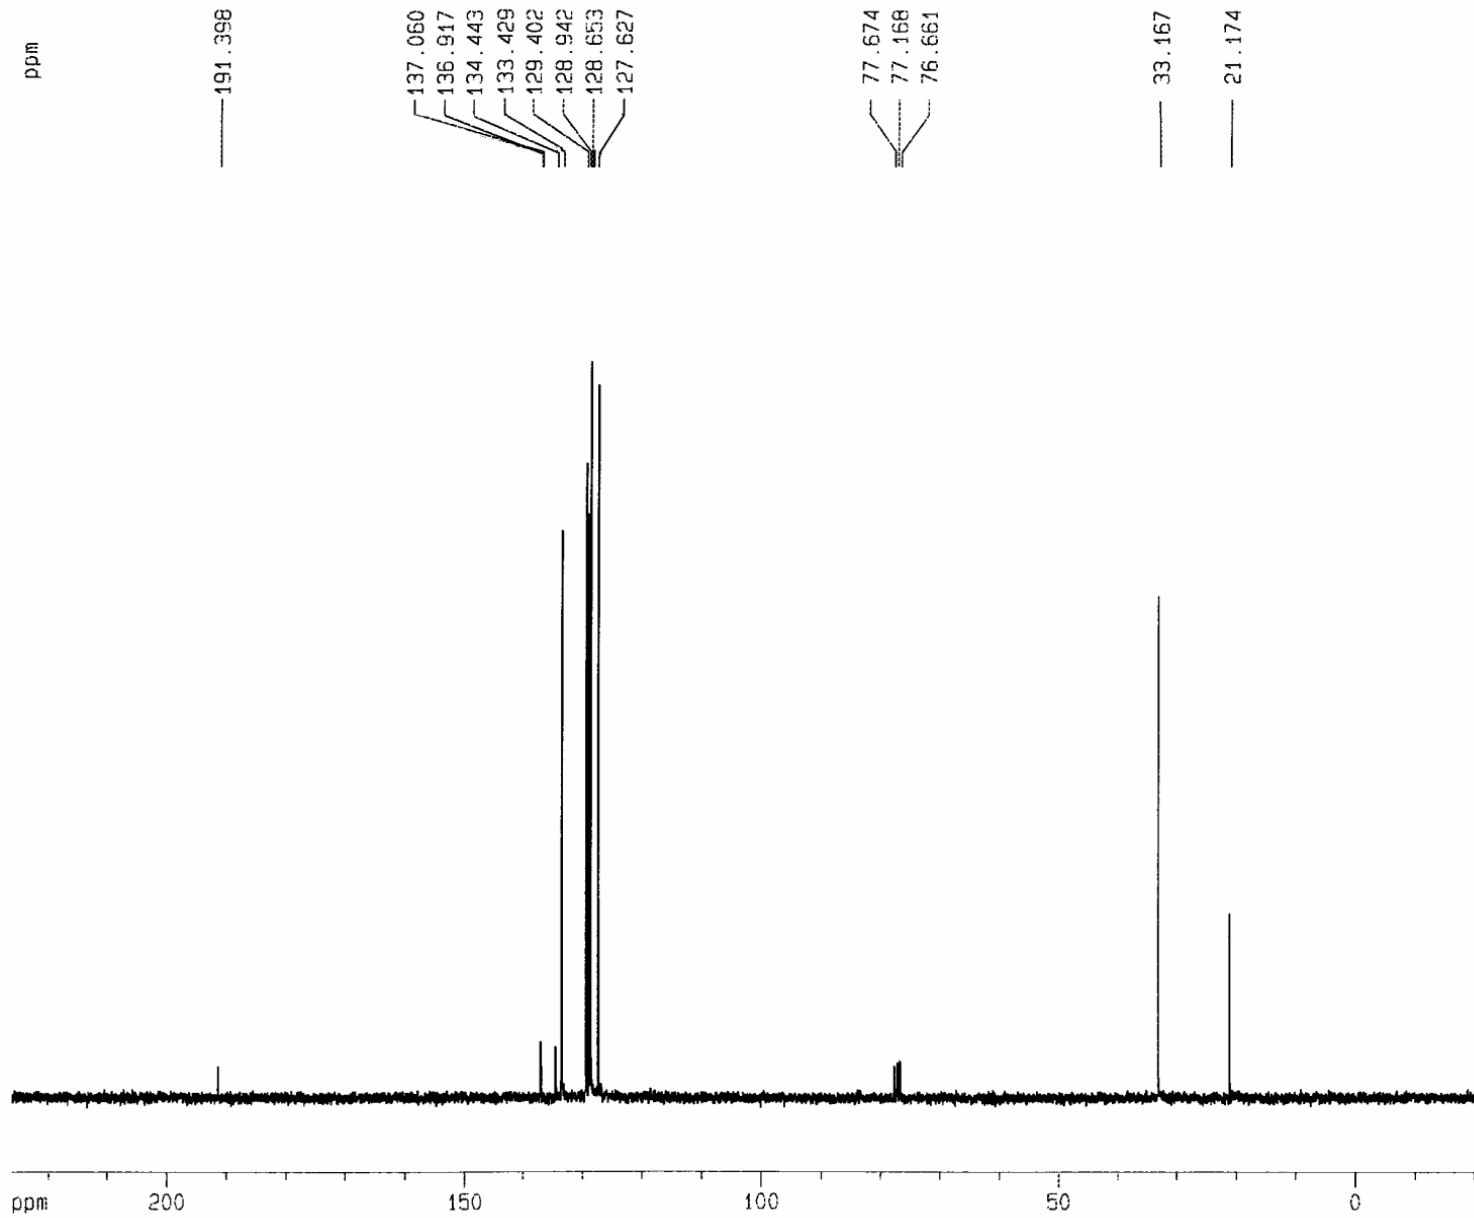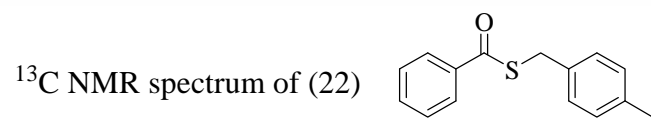

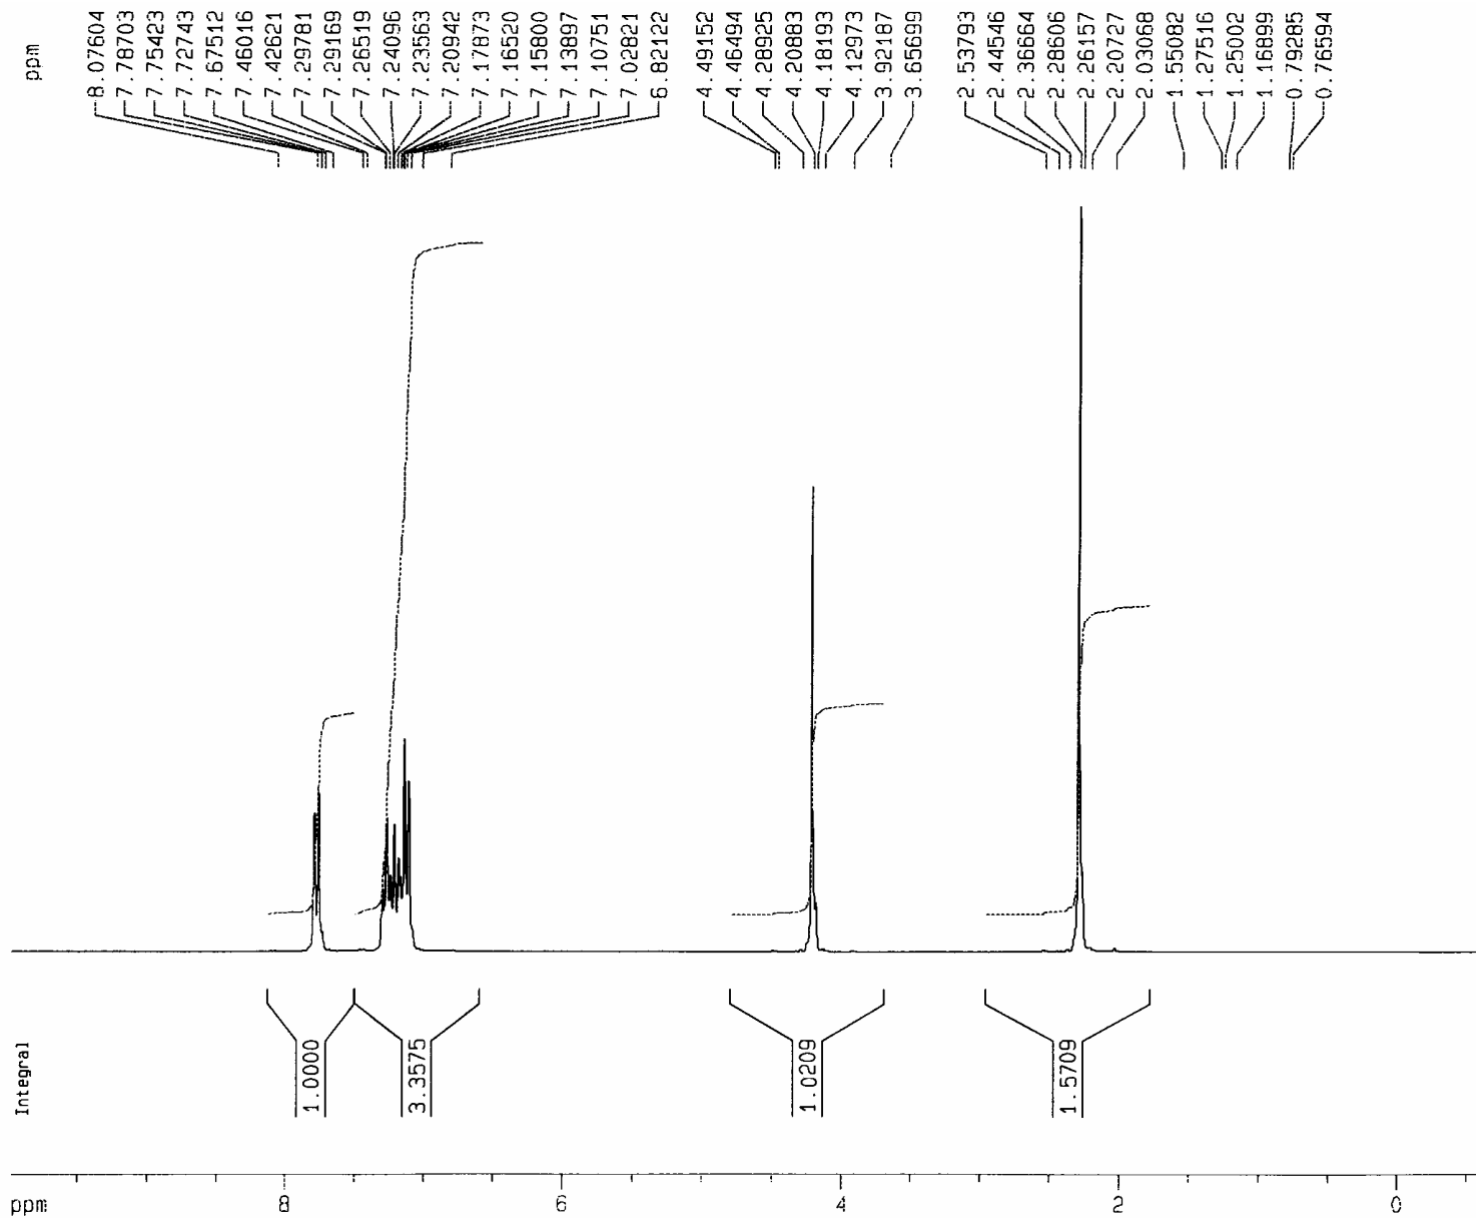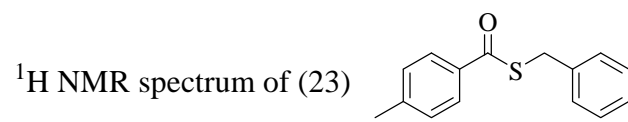

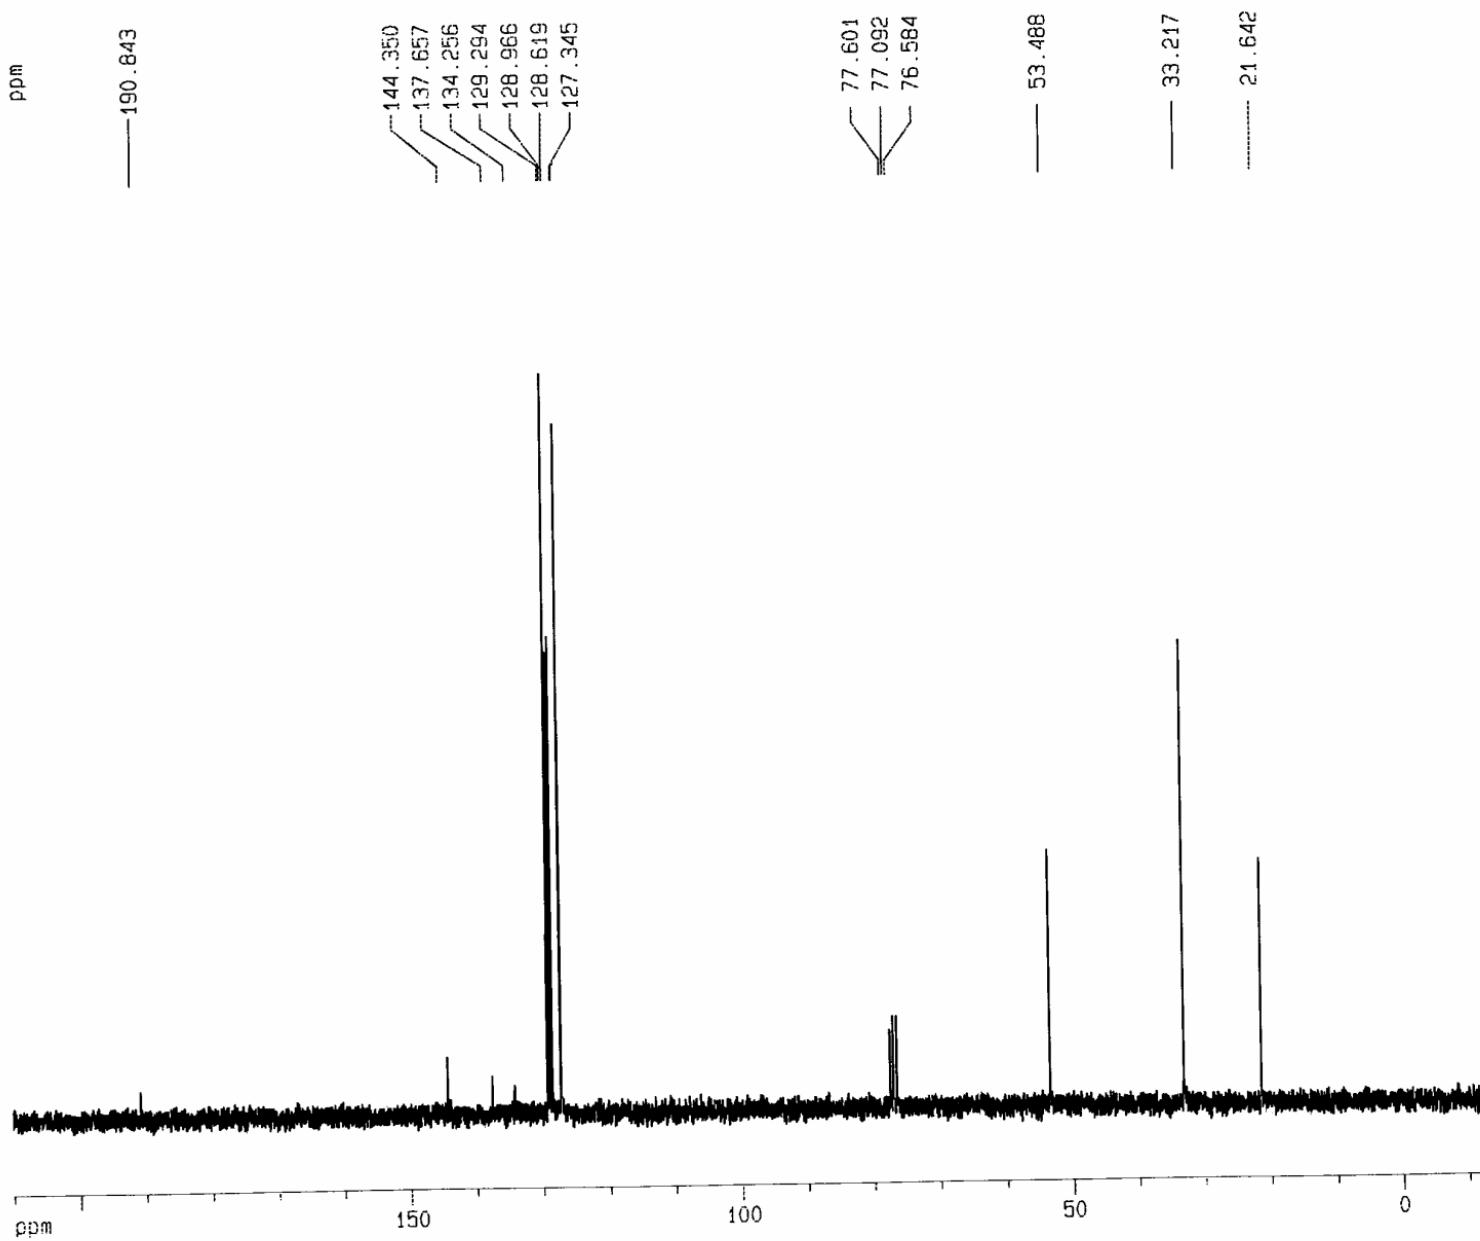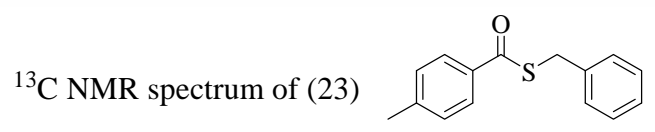

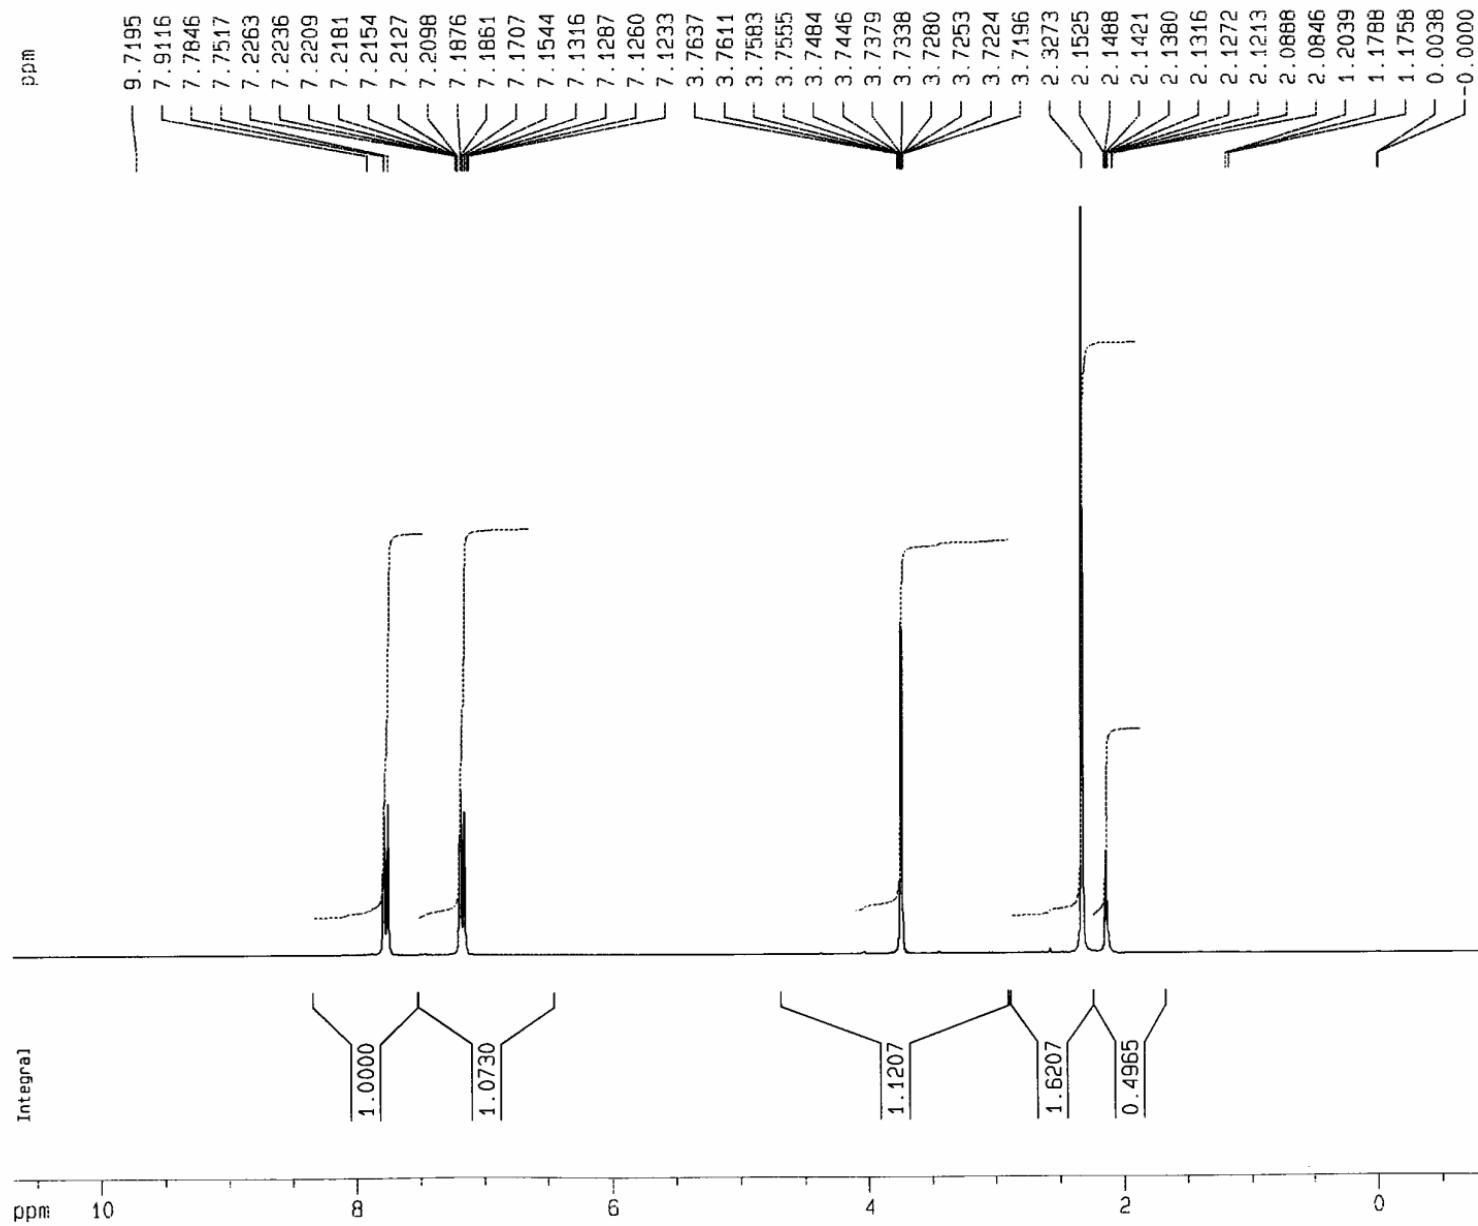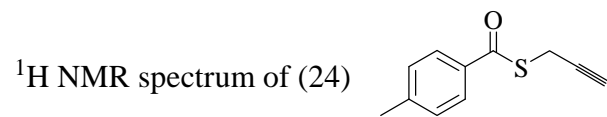



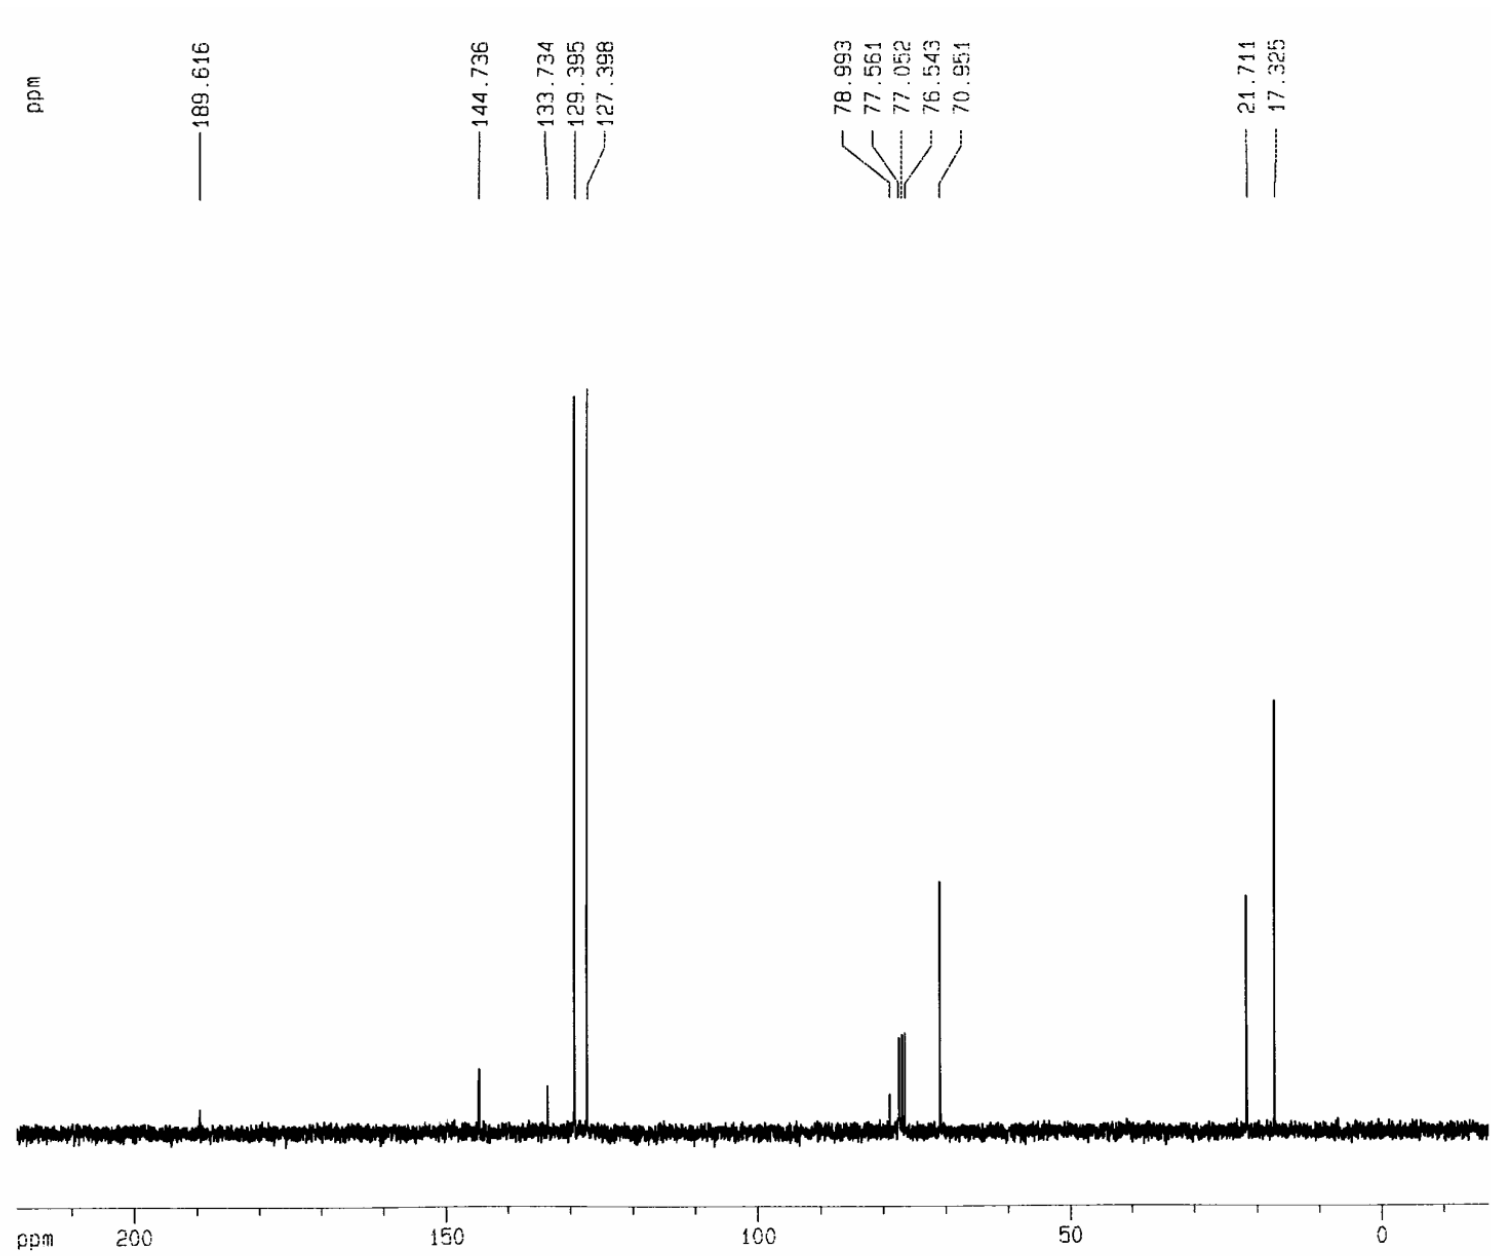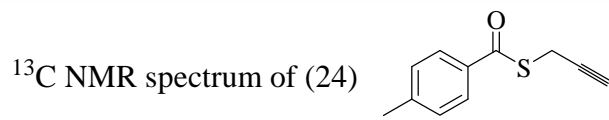

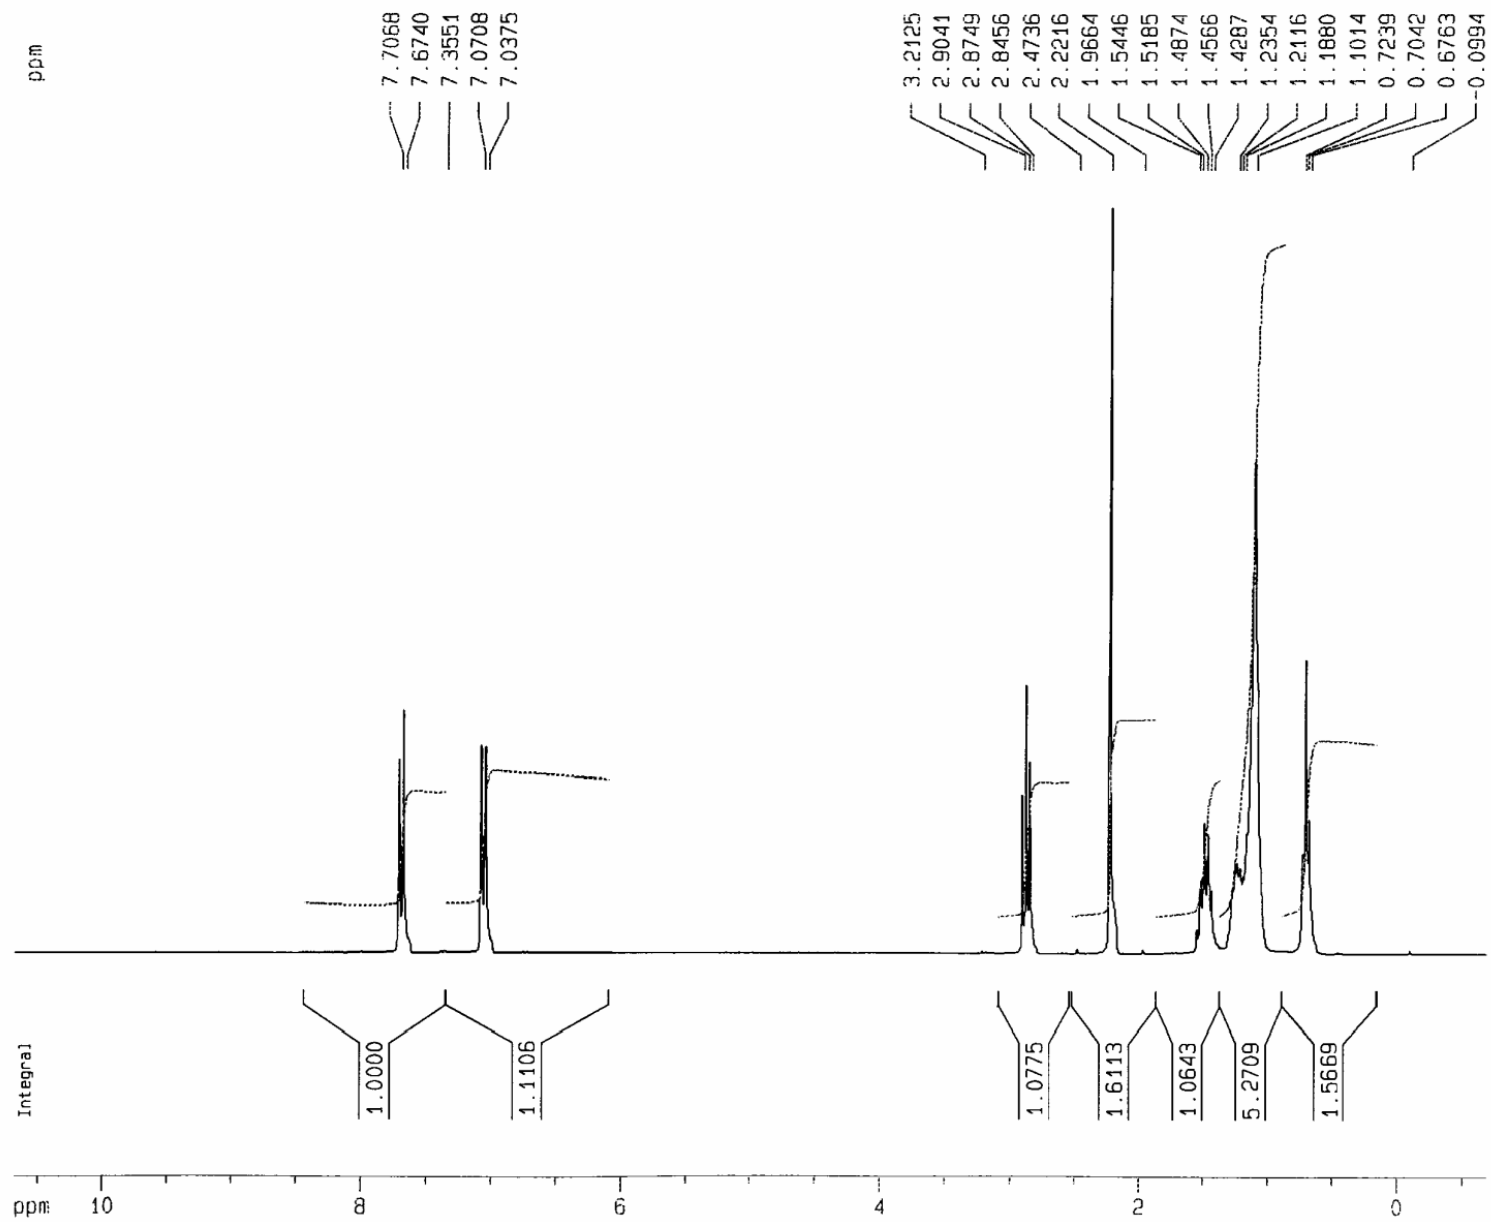

<sup>1</sup>H NMR spectrum of (25) CSCCCCCCCCC(=O)c1ccc(C)cc1

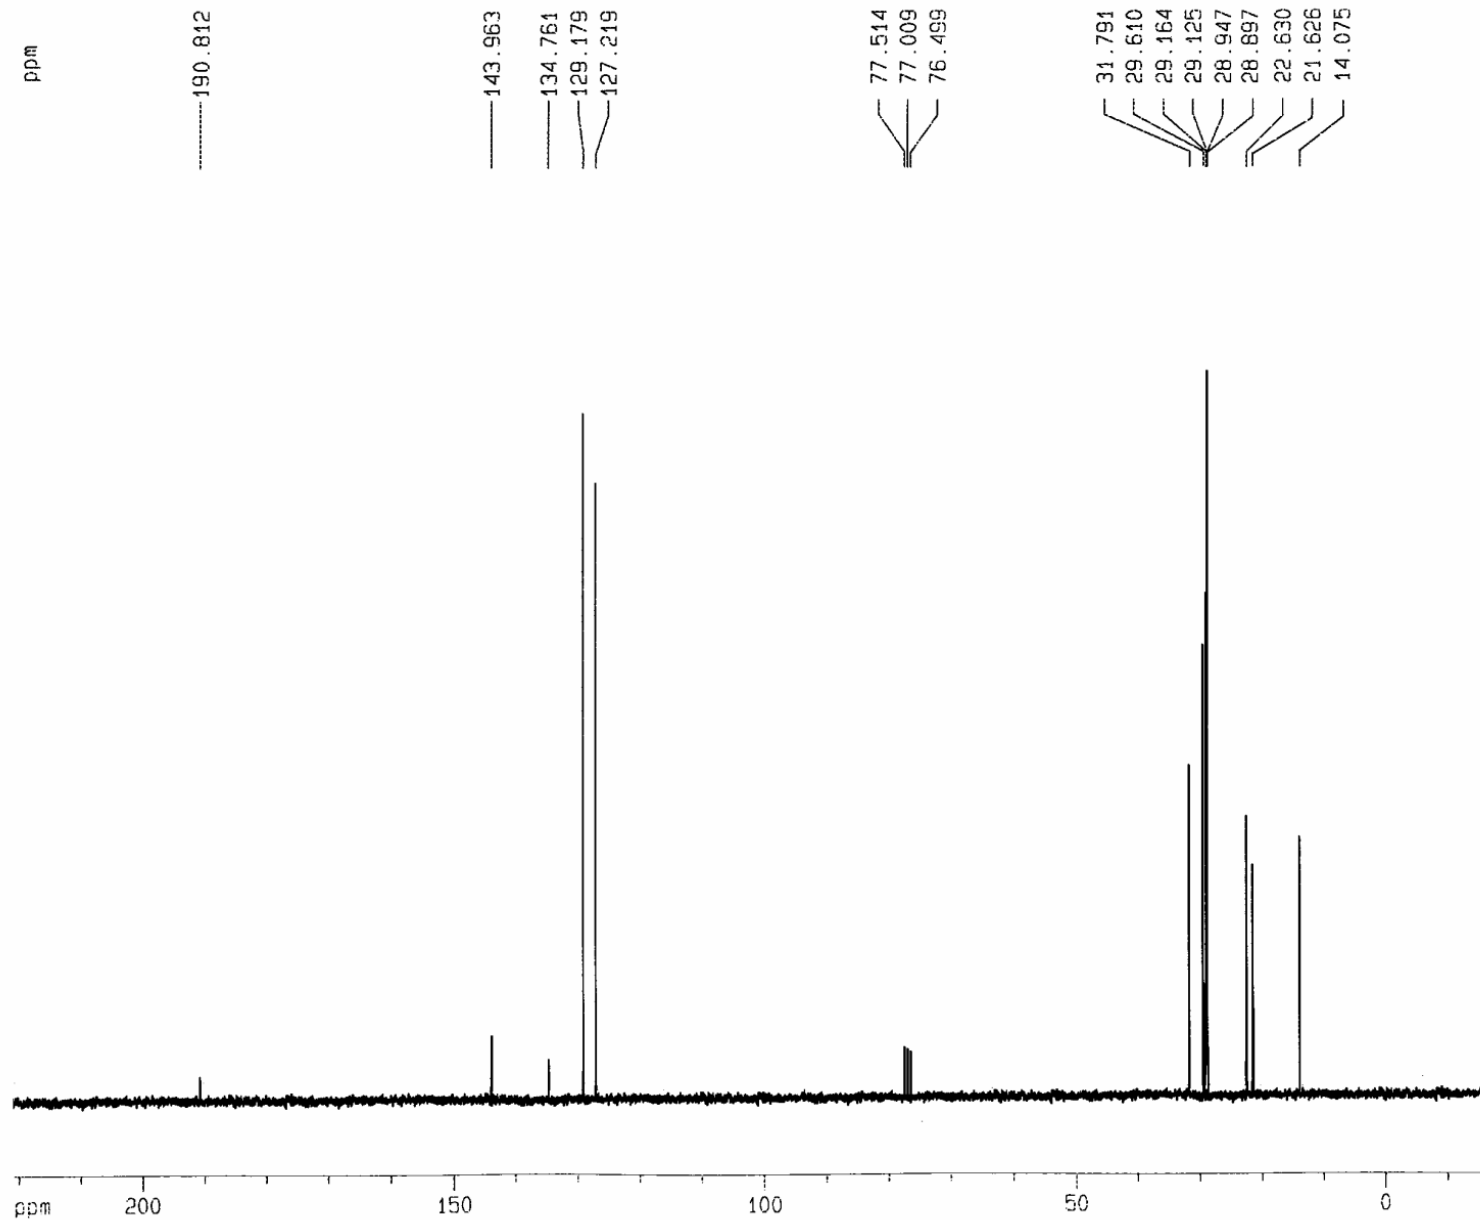

$^{13}\text{C}$  NMR spectrum of (25) CCCCCCCCC(=O)c1ccc(C)cc1

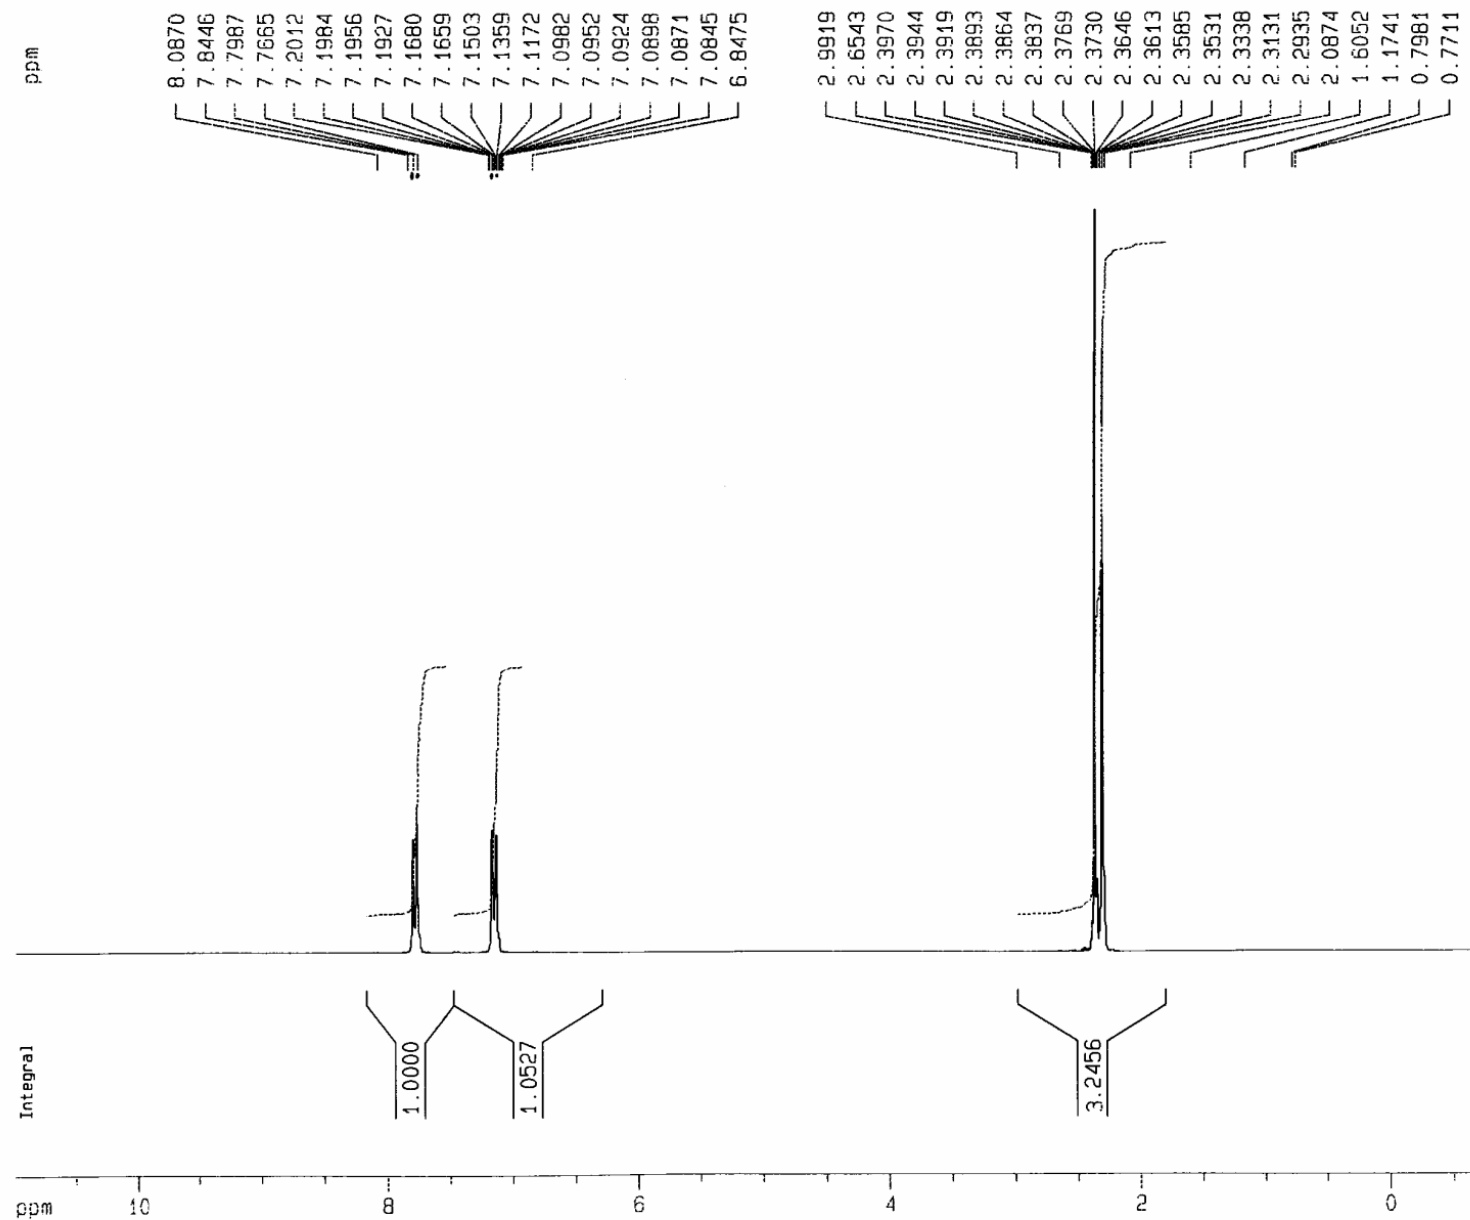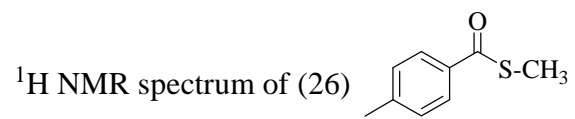

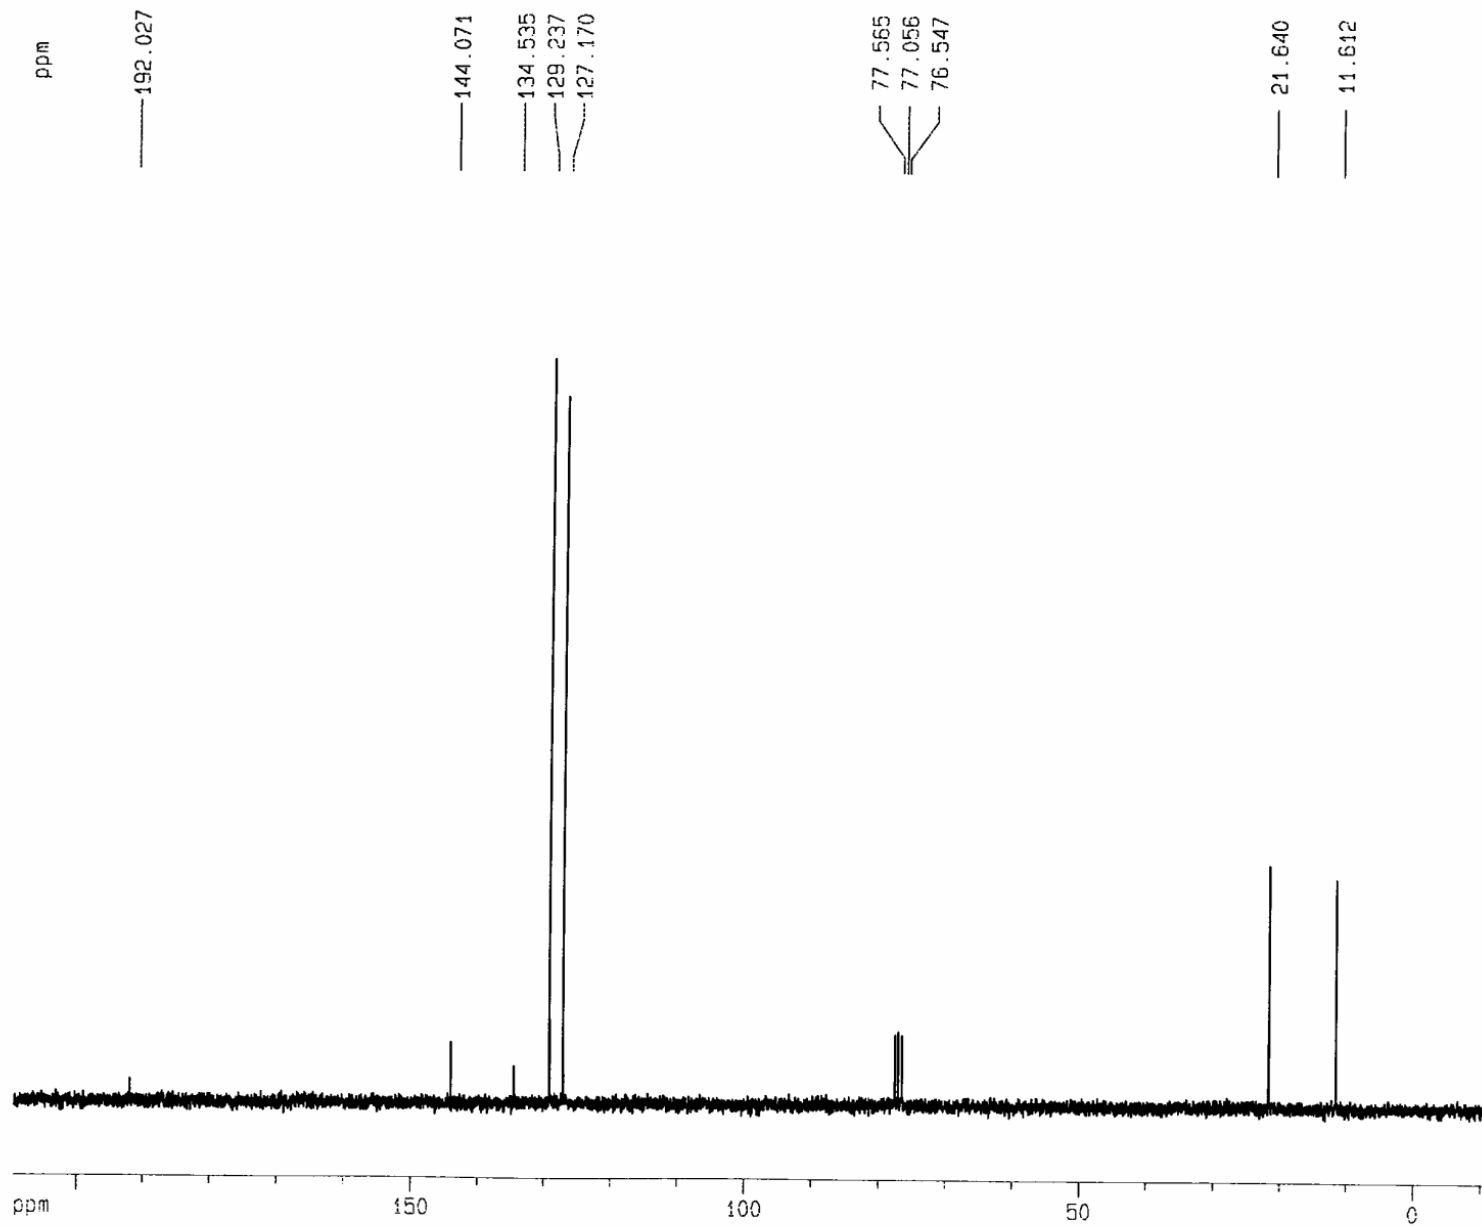

$^{13}\text{C}$  NMR spectrum of (26) Cc1ccc(C(=O)S)cc1

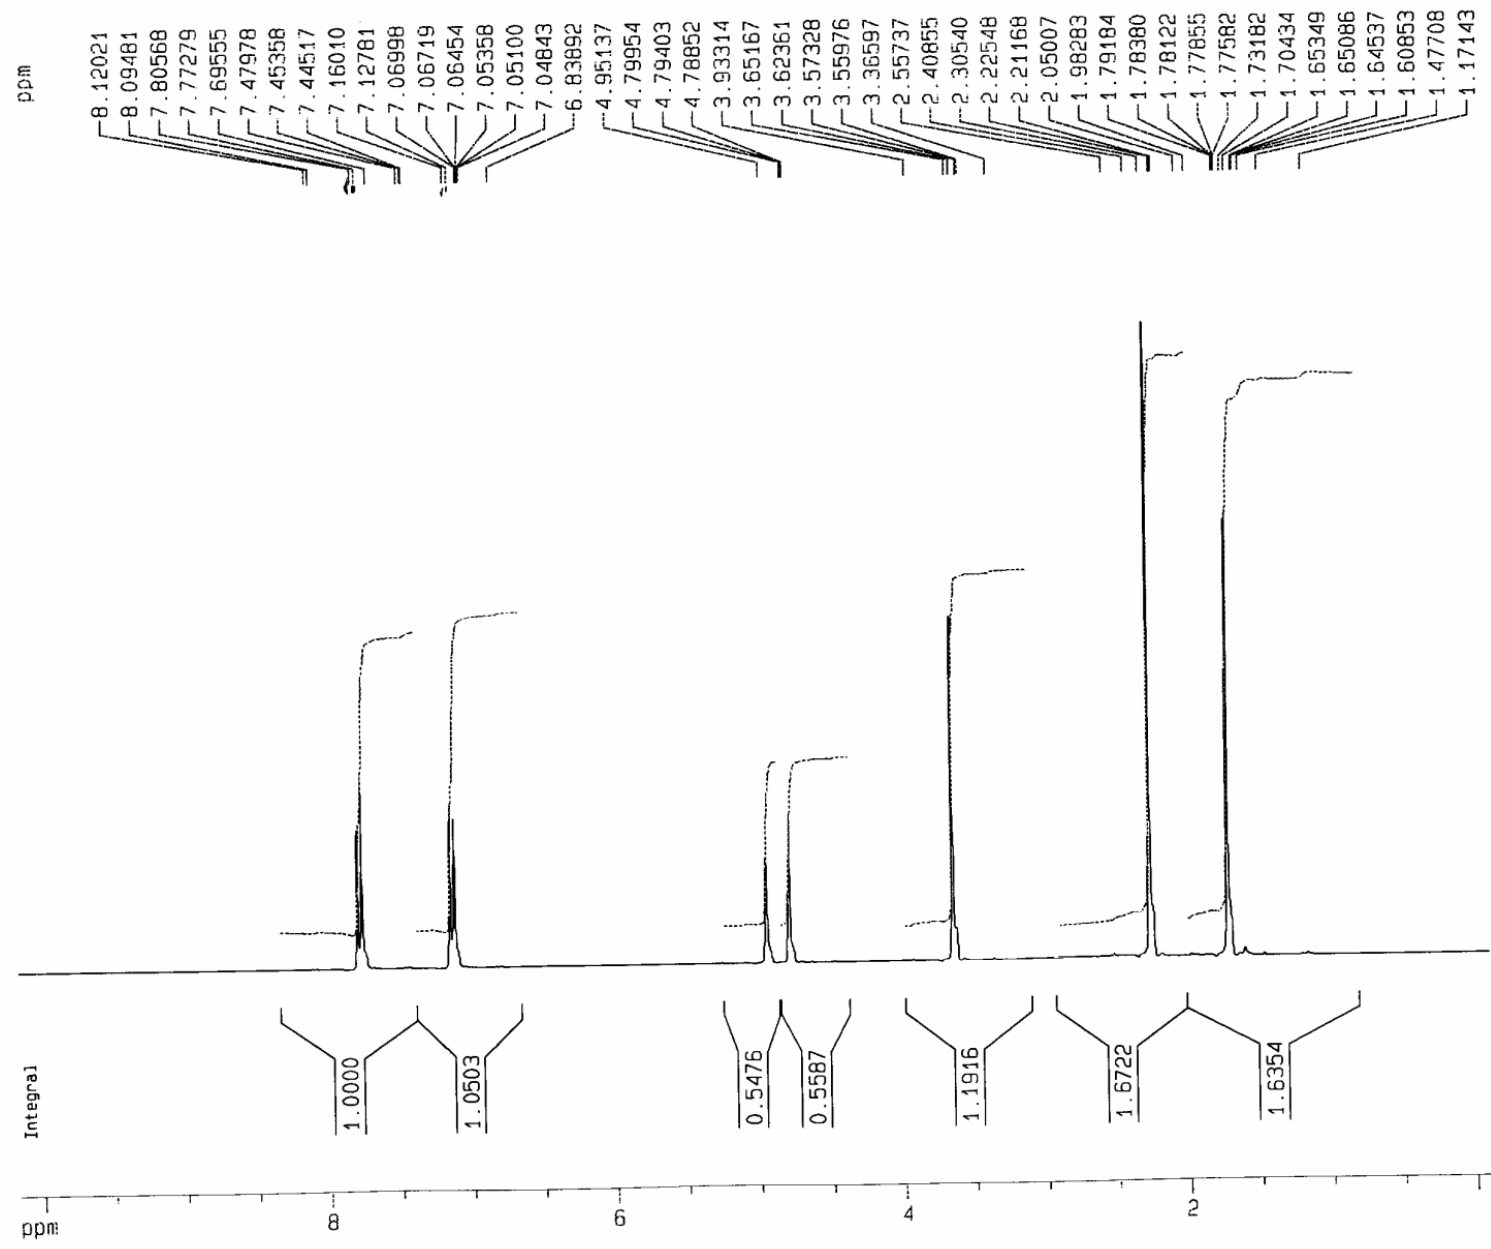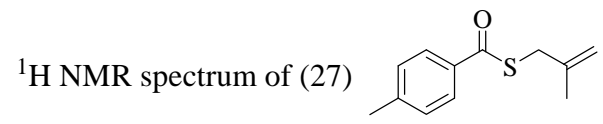

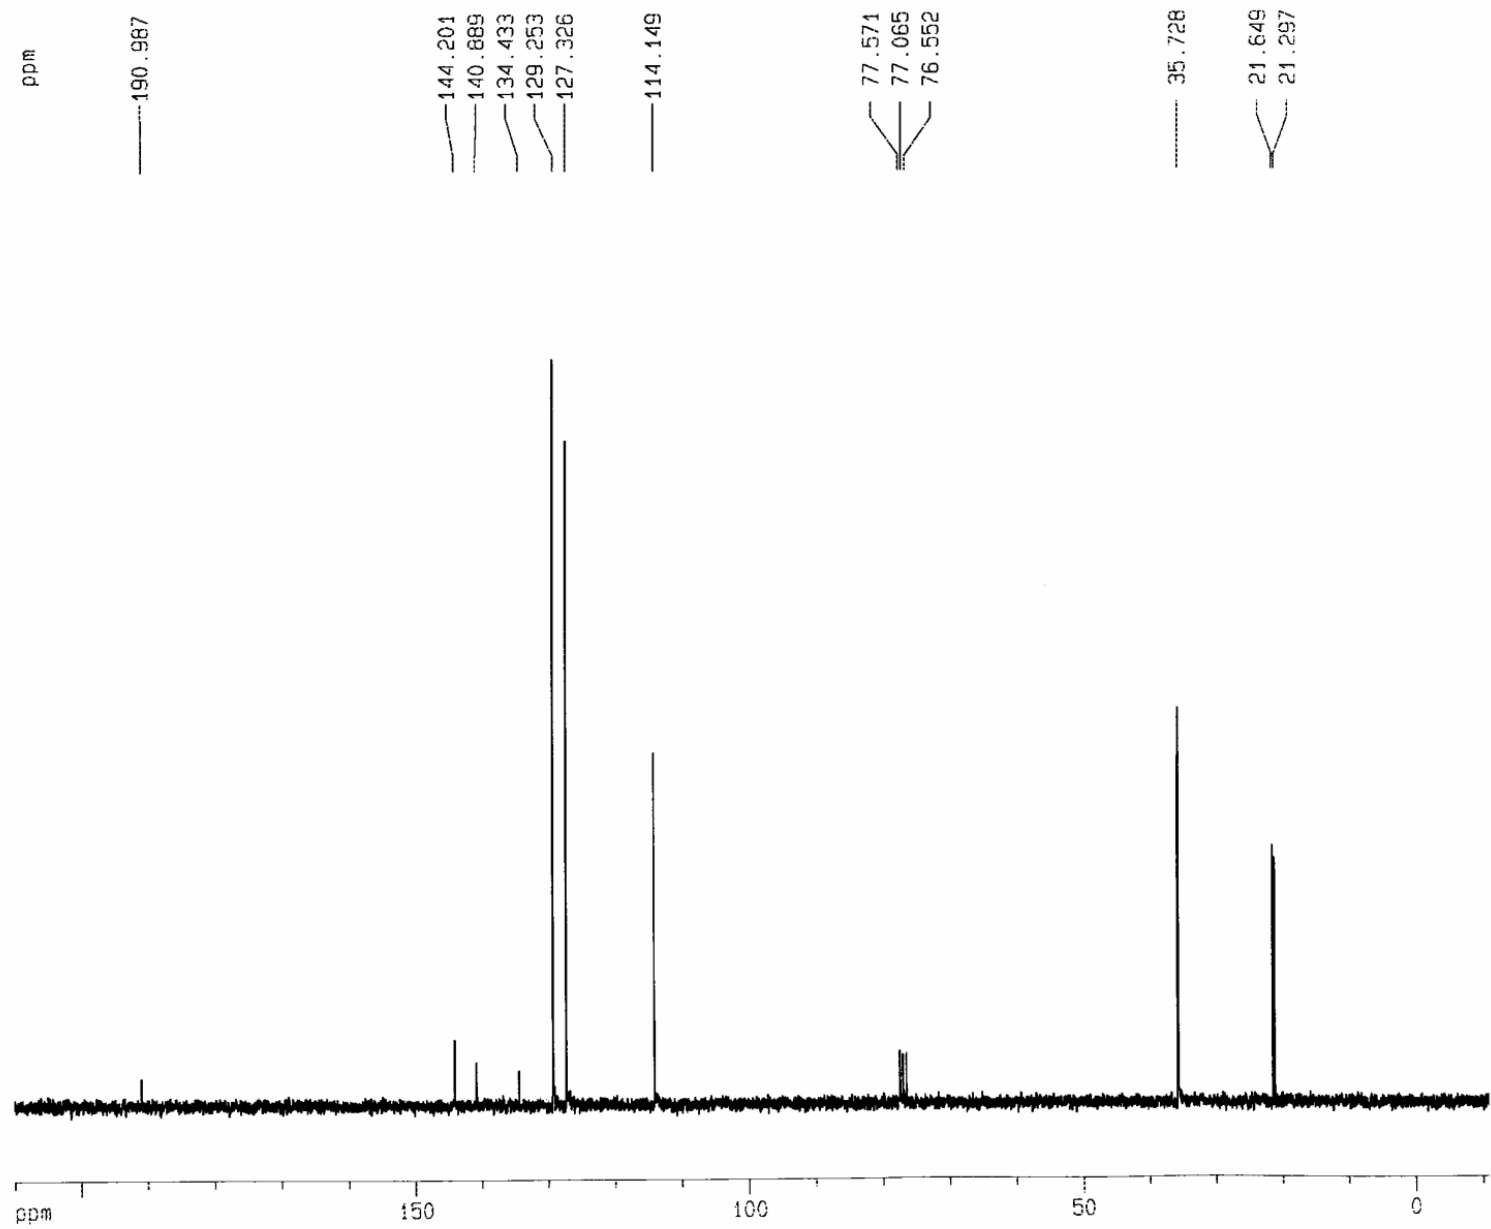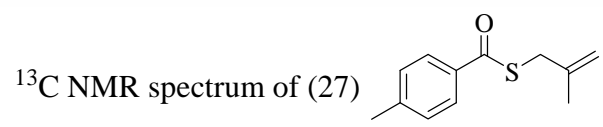

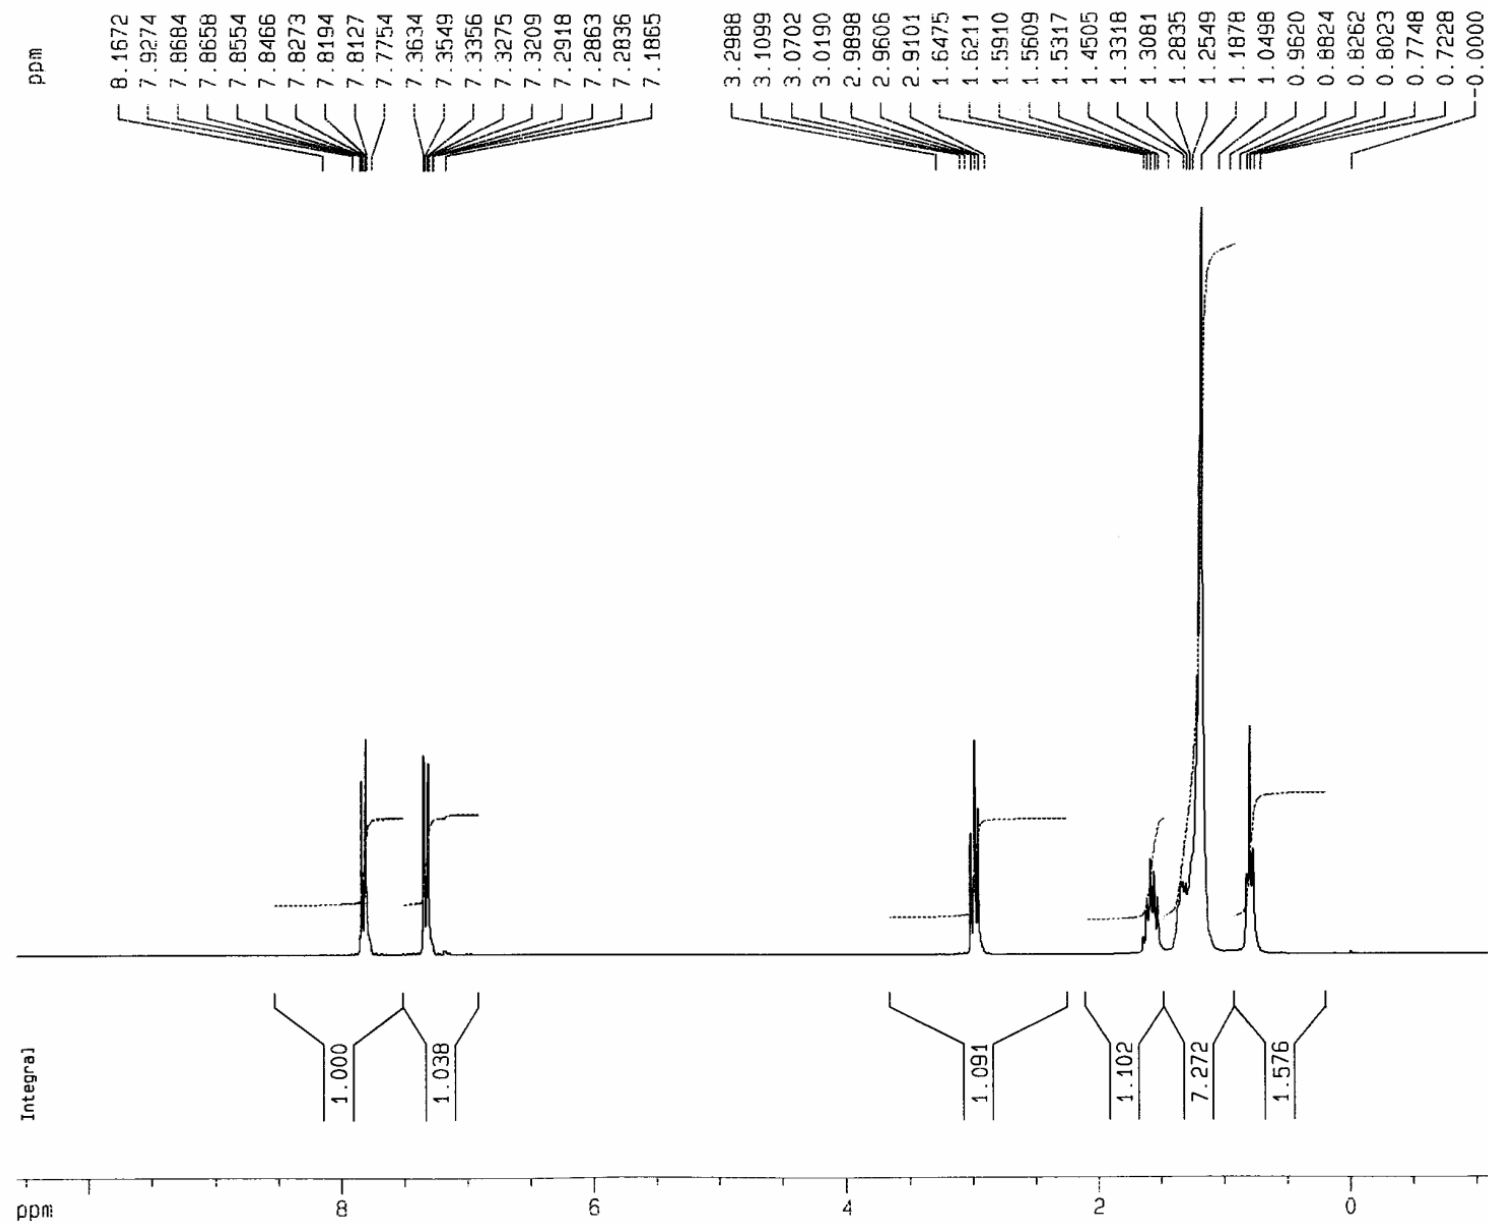

<sup>1</sup>H NMR spectrum of (28)

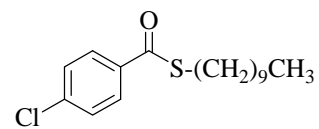



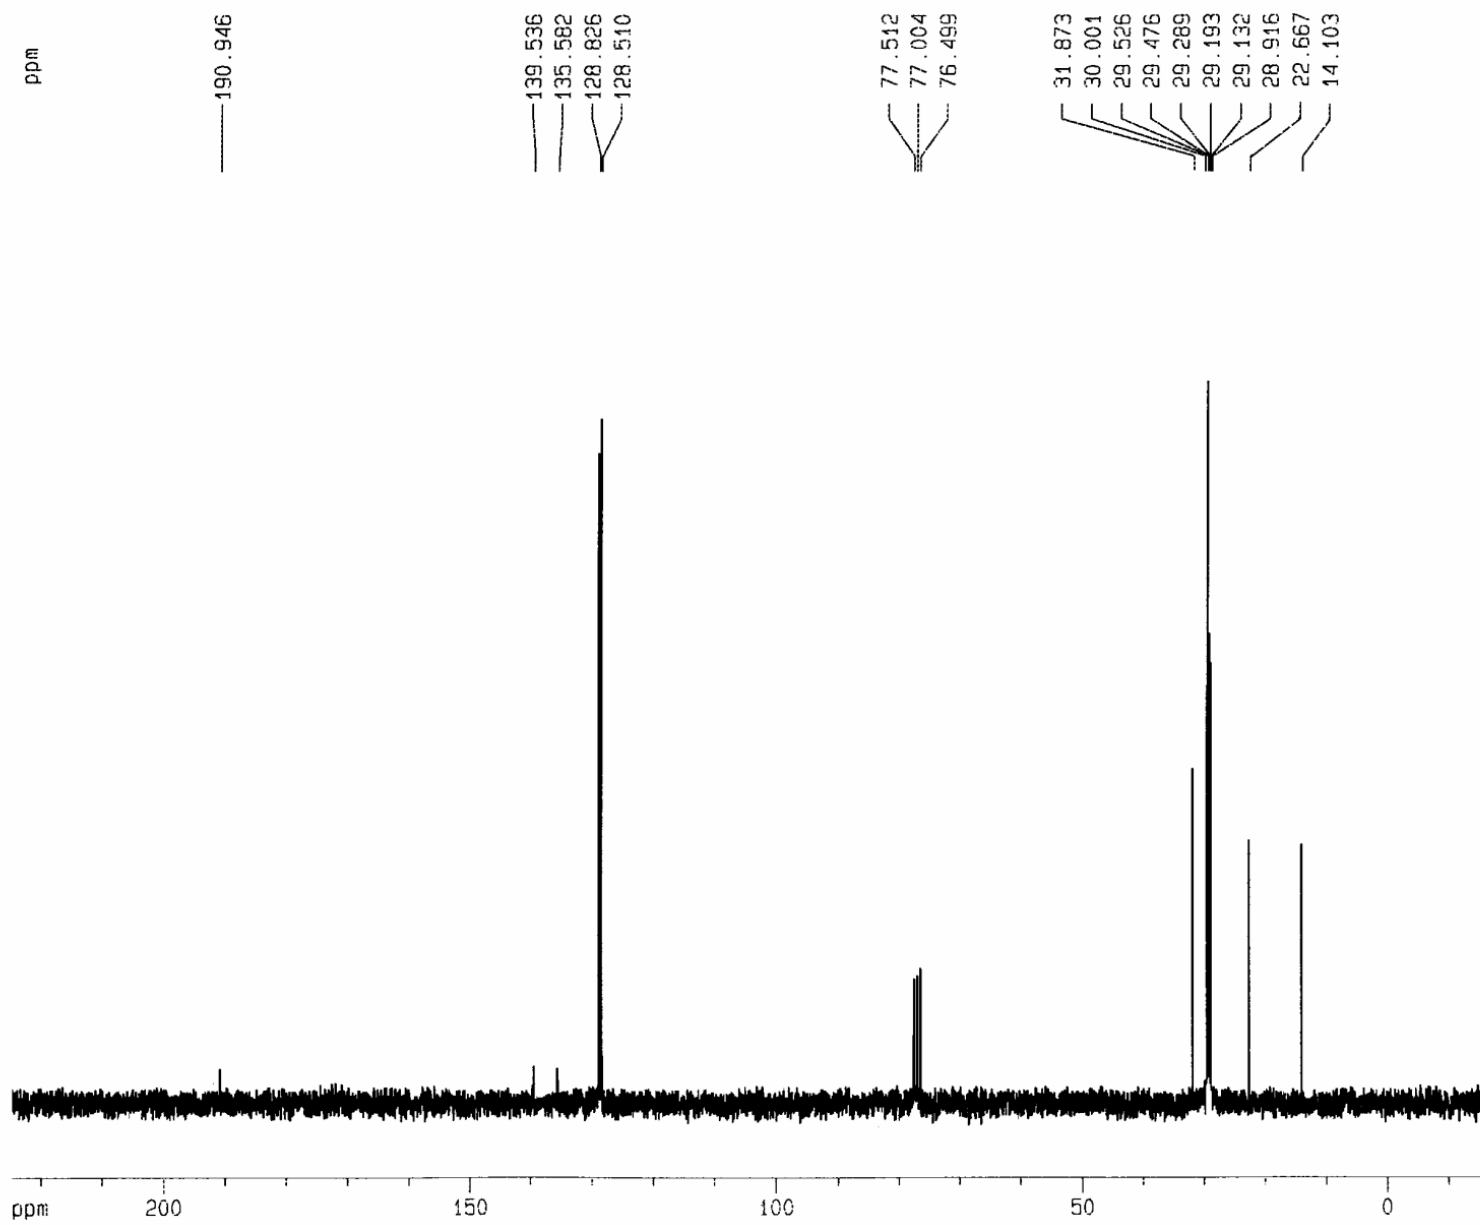

<sup>13</sup>C NMR spectrum of (28)

Clc1ccc(cc1)C(=O)S(CH2)9CH3

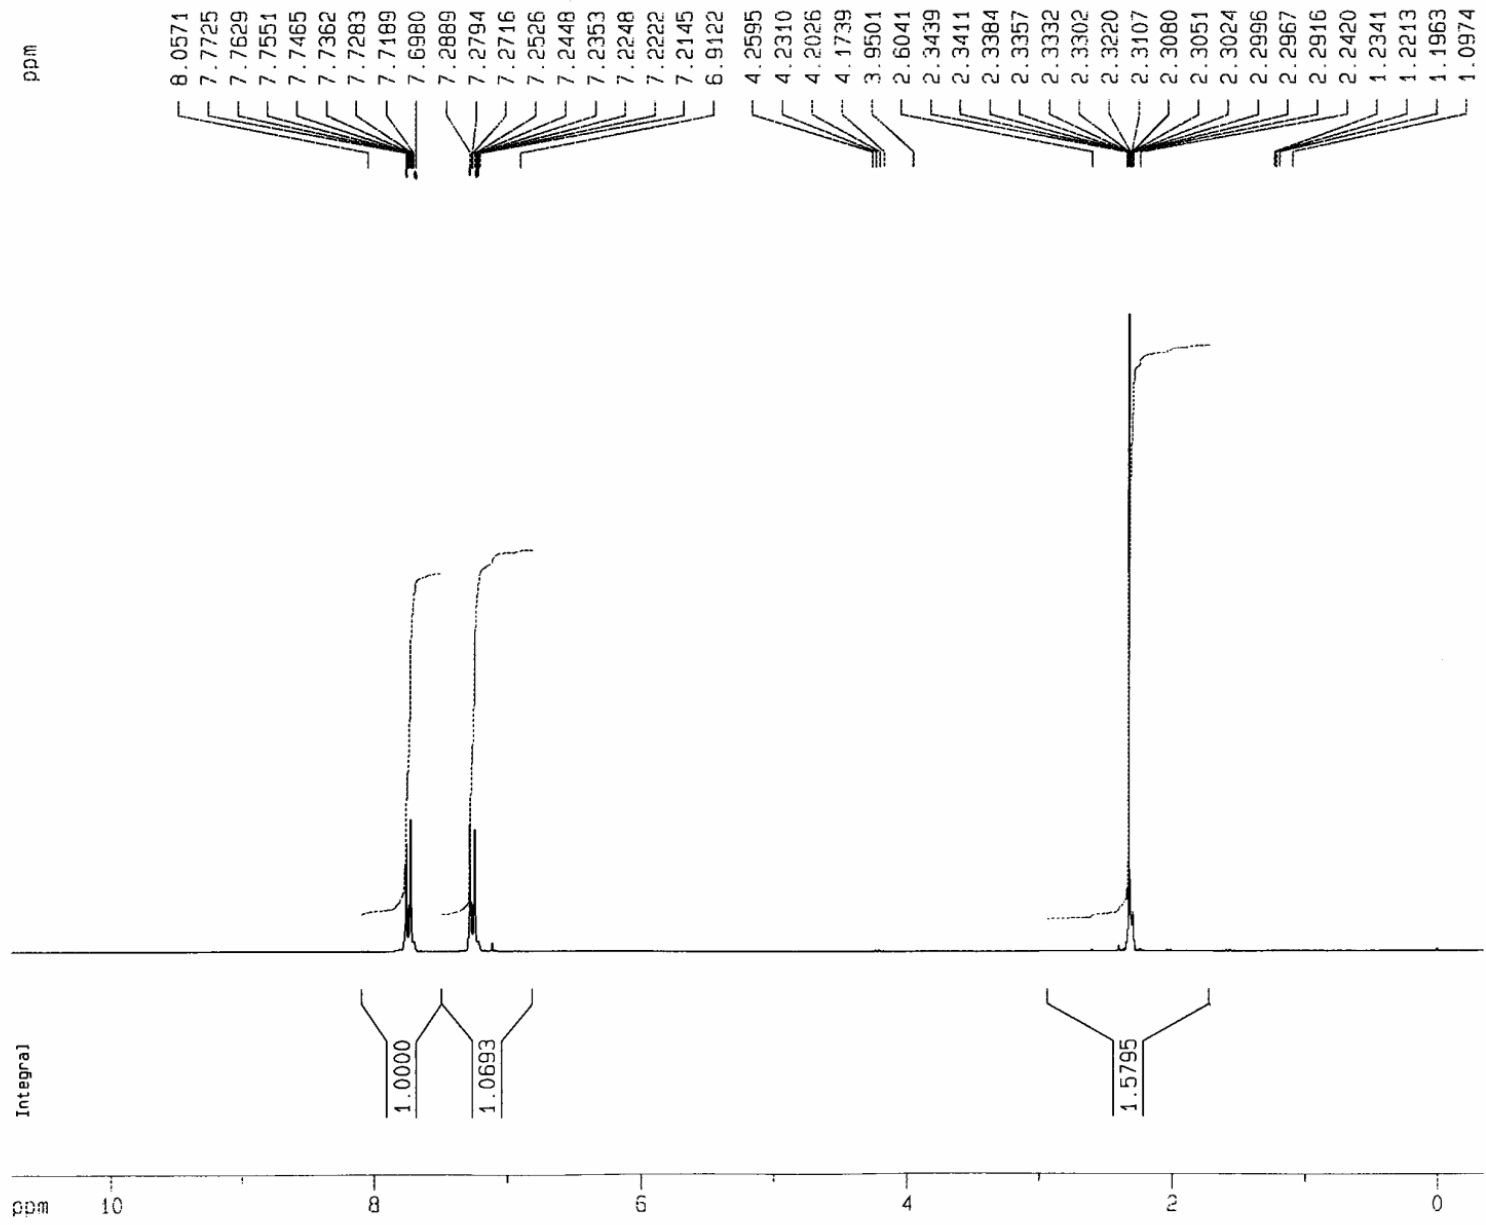

<sup>1</sup>H NMR spectrum of (29) CC(=O)c1ccc(Cl)cc1

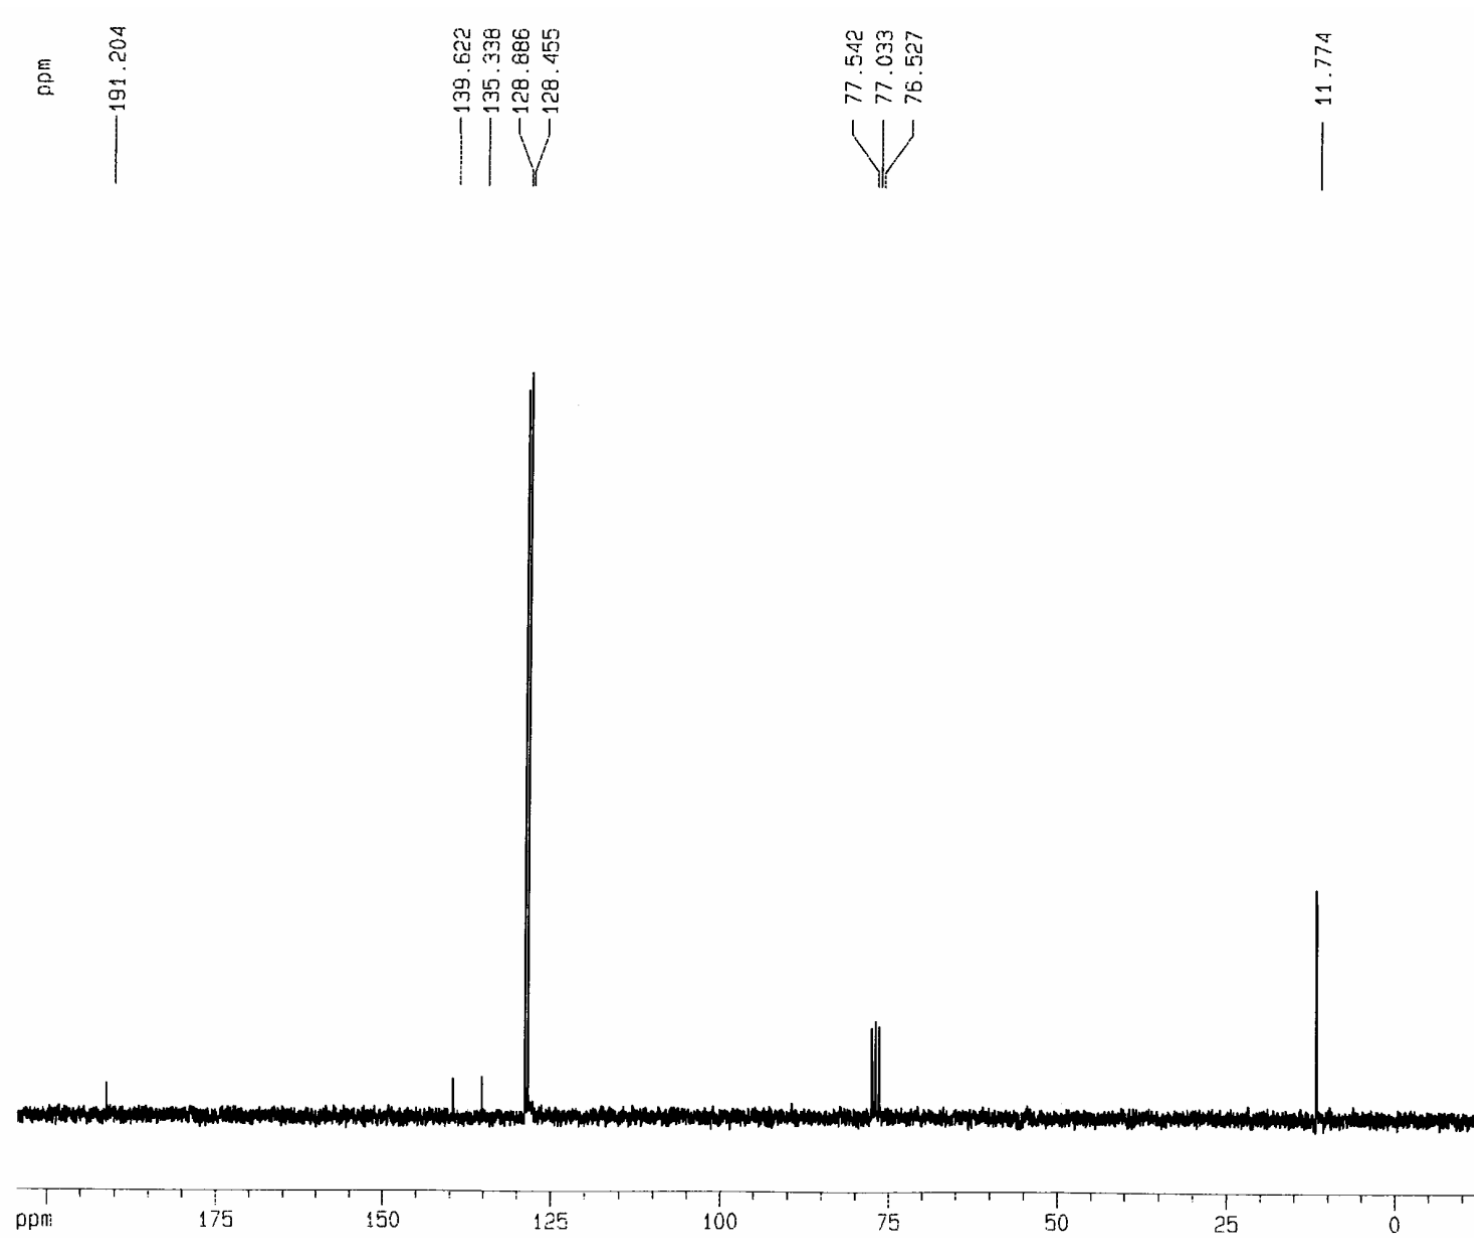

$^{13}\text{C}$  NMR spectrum of (29)

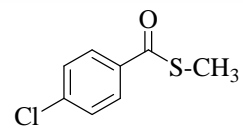

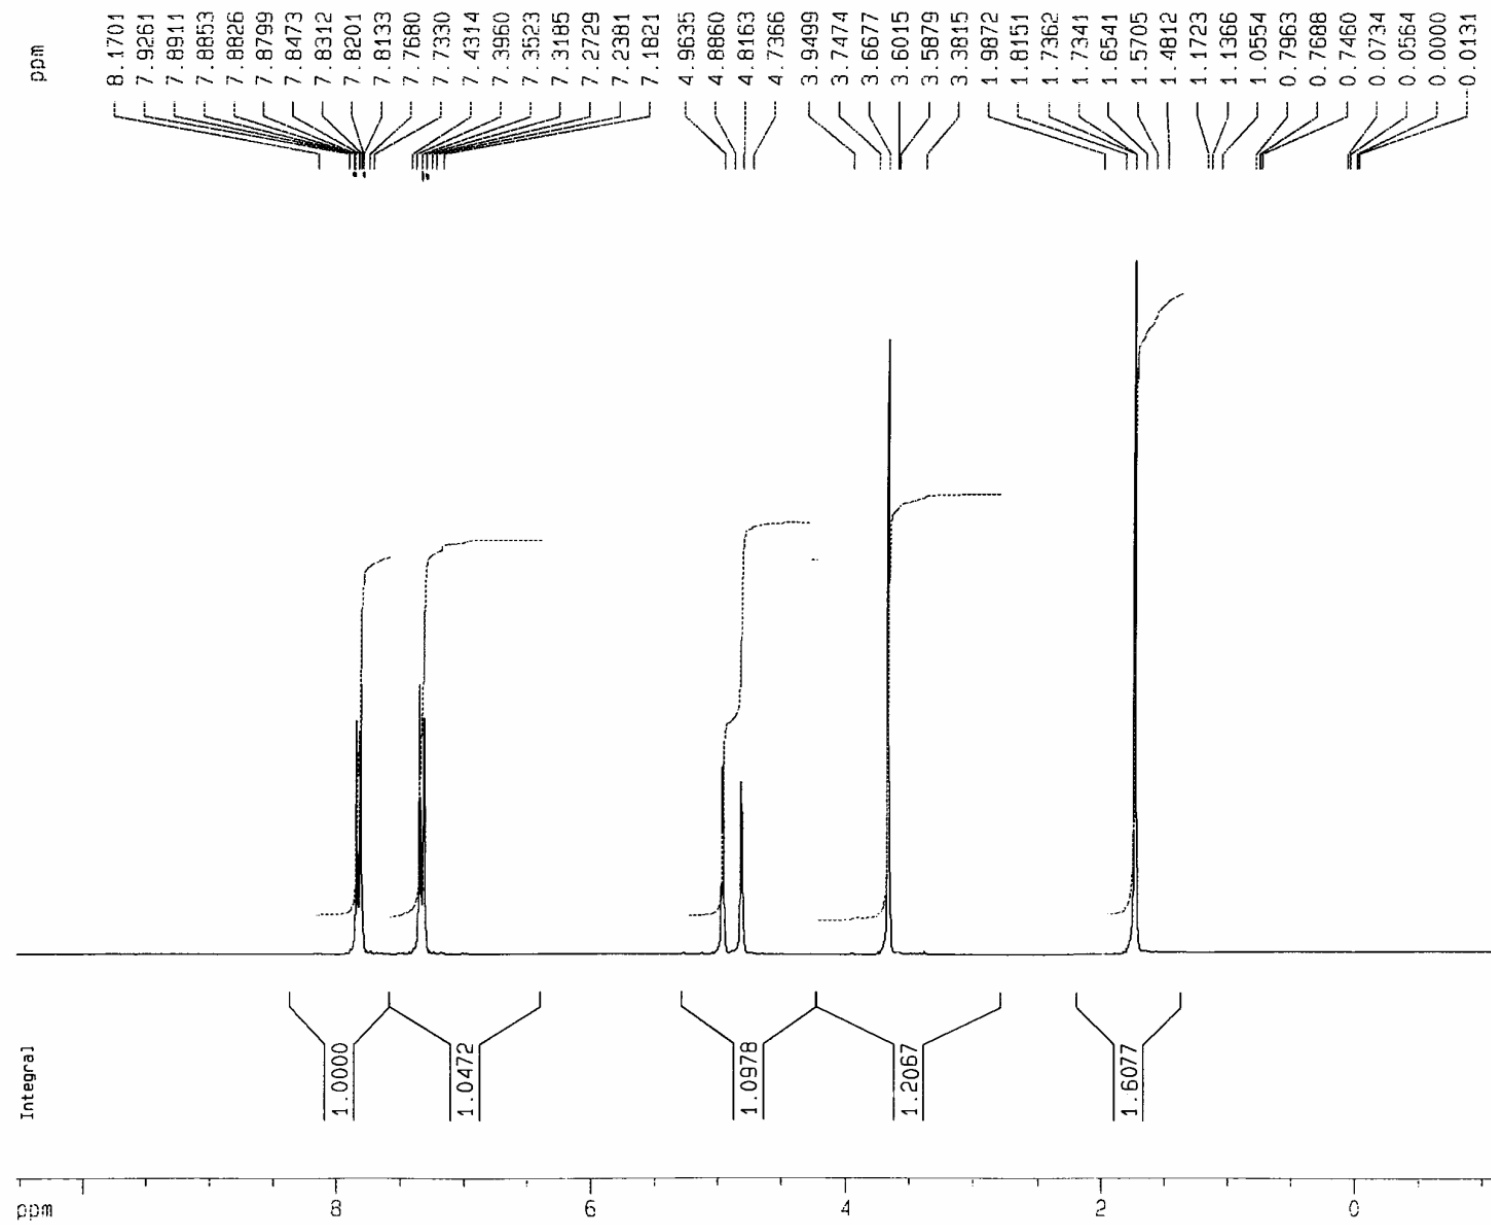

<sup>1</sup>H NMR spectrum of (30)

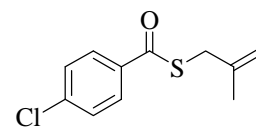

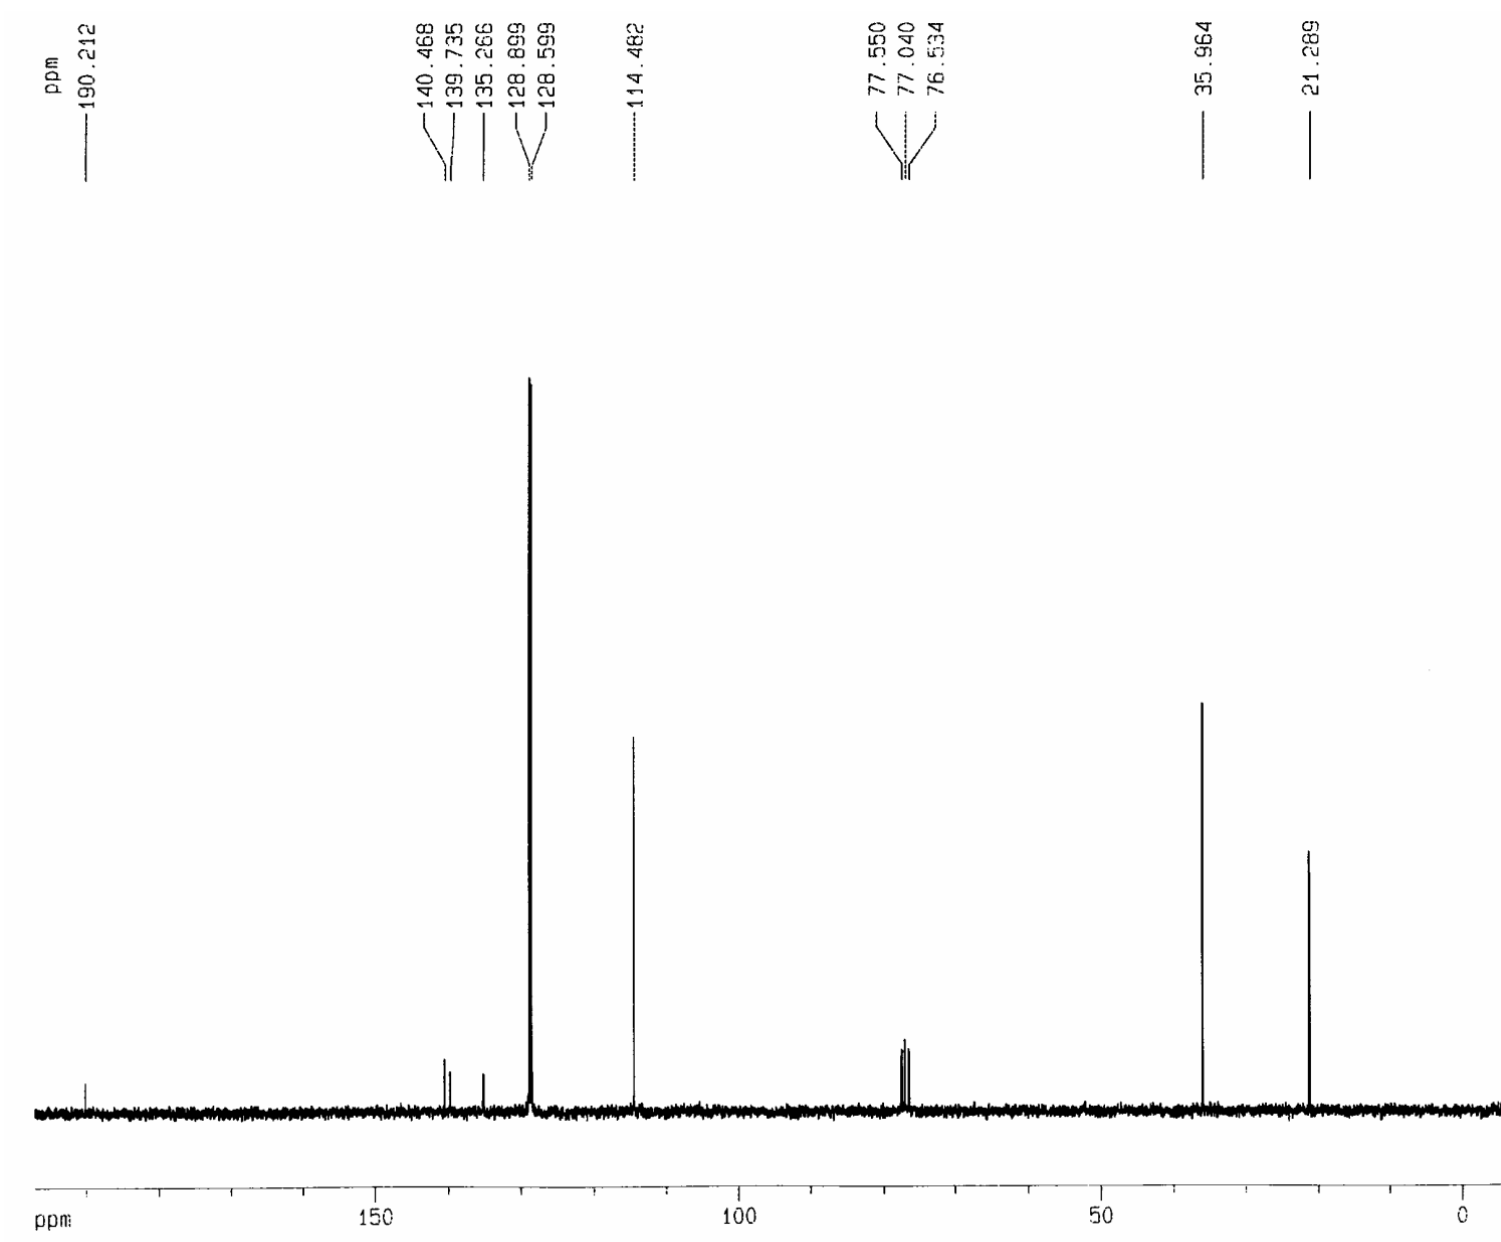

$^{13}\text{C}$  NMR spectrum of (30)

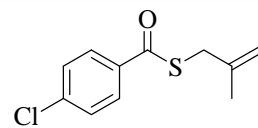

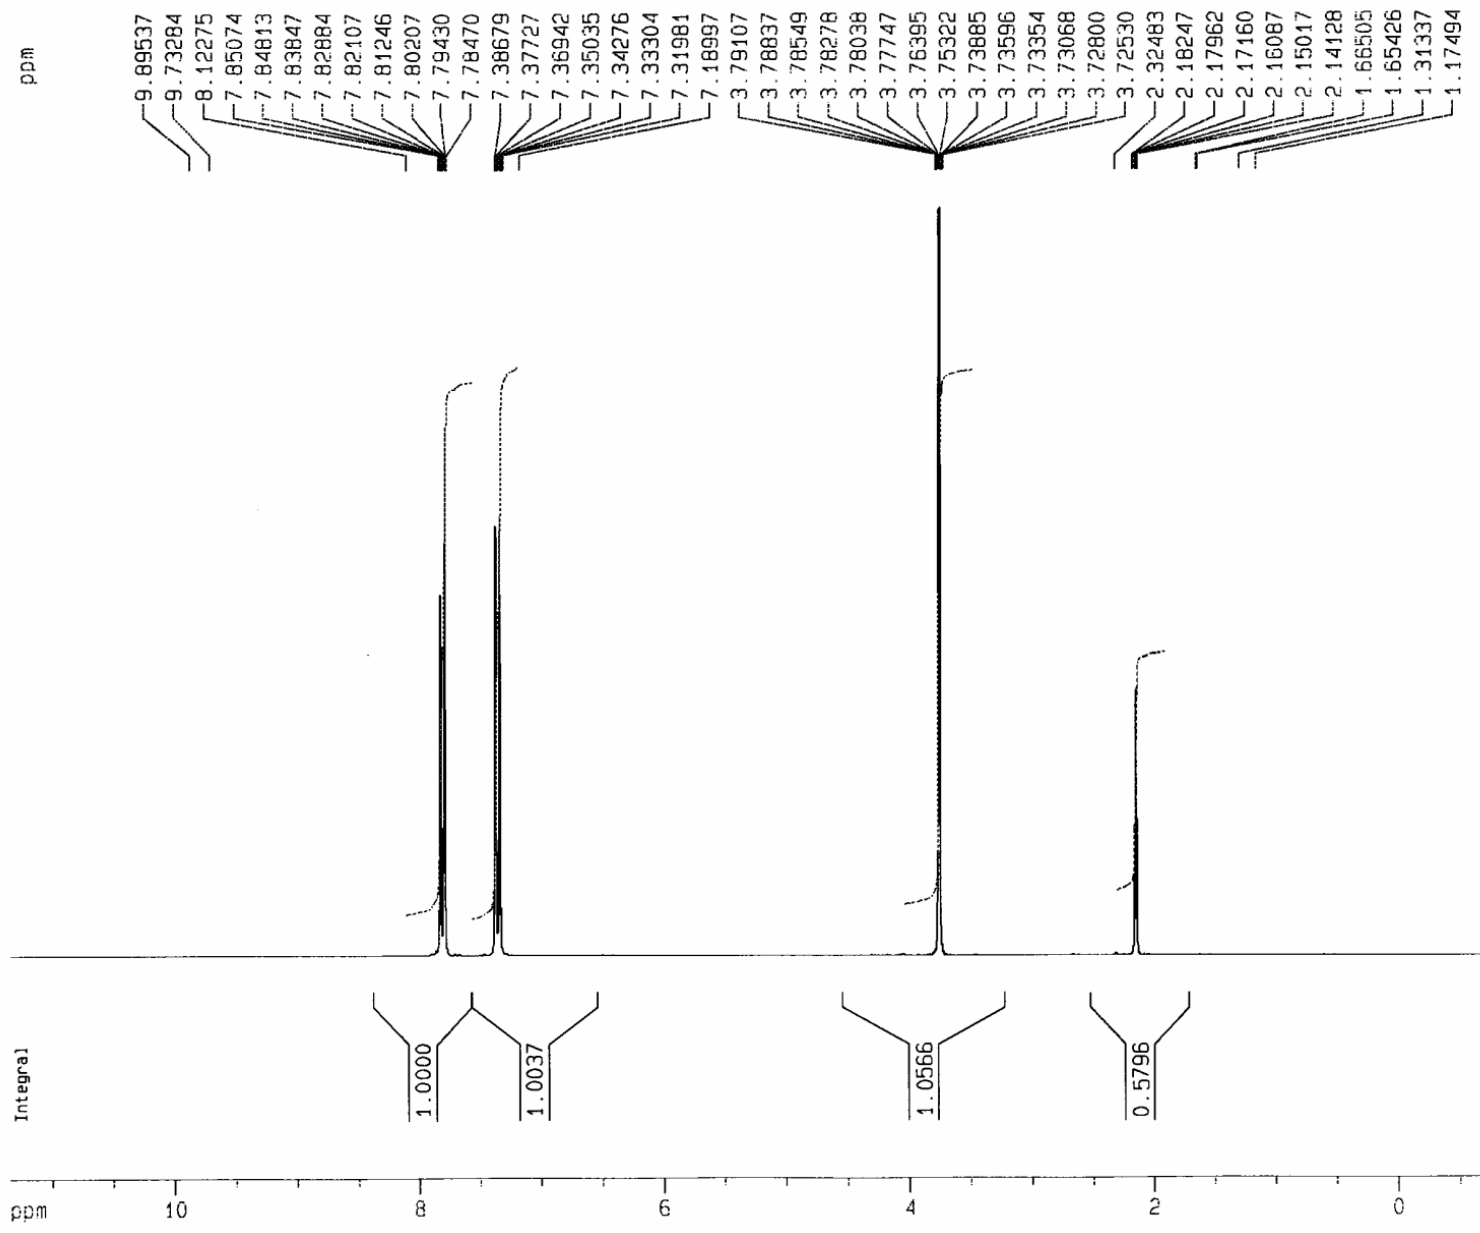

<sup>1</sup>H NMR spectrum of (31)

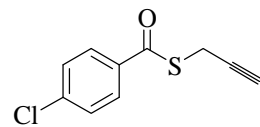

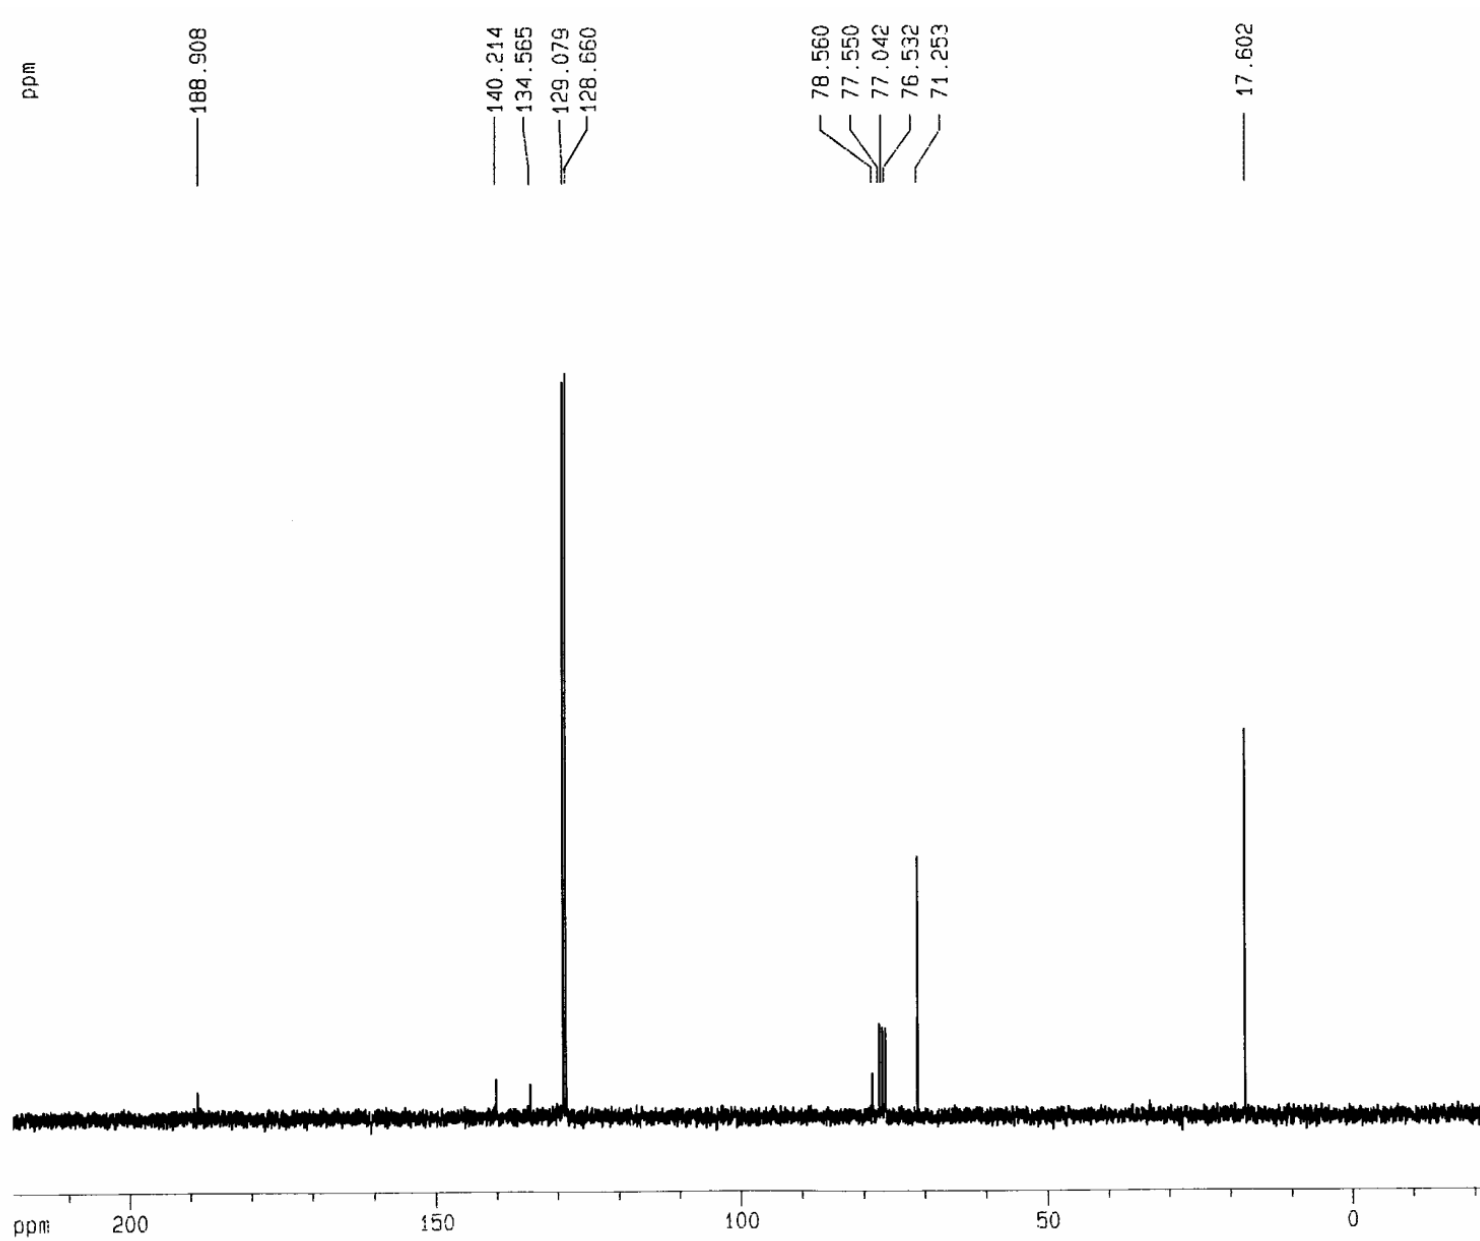

$^{13}\text{C}$  NMR spectrum of (31)

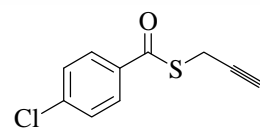

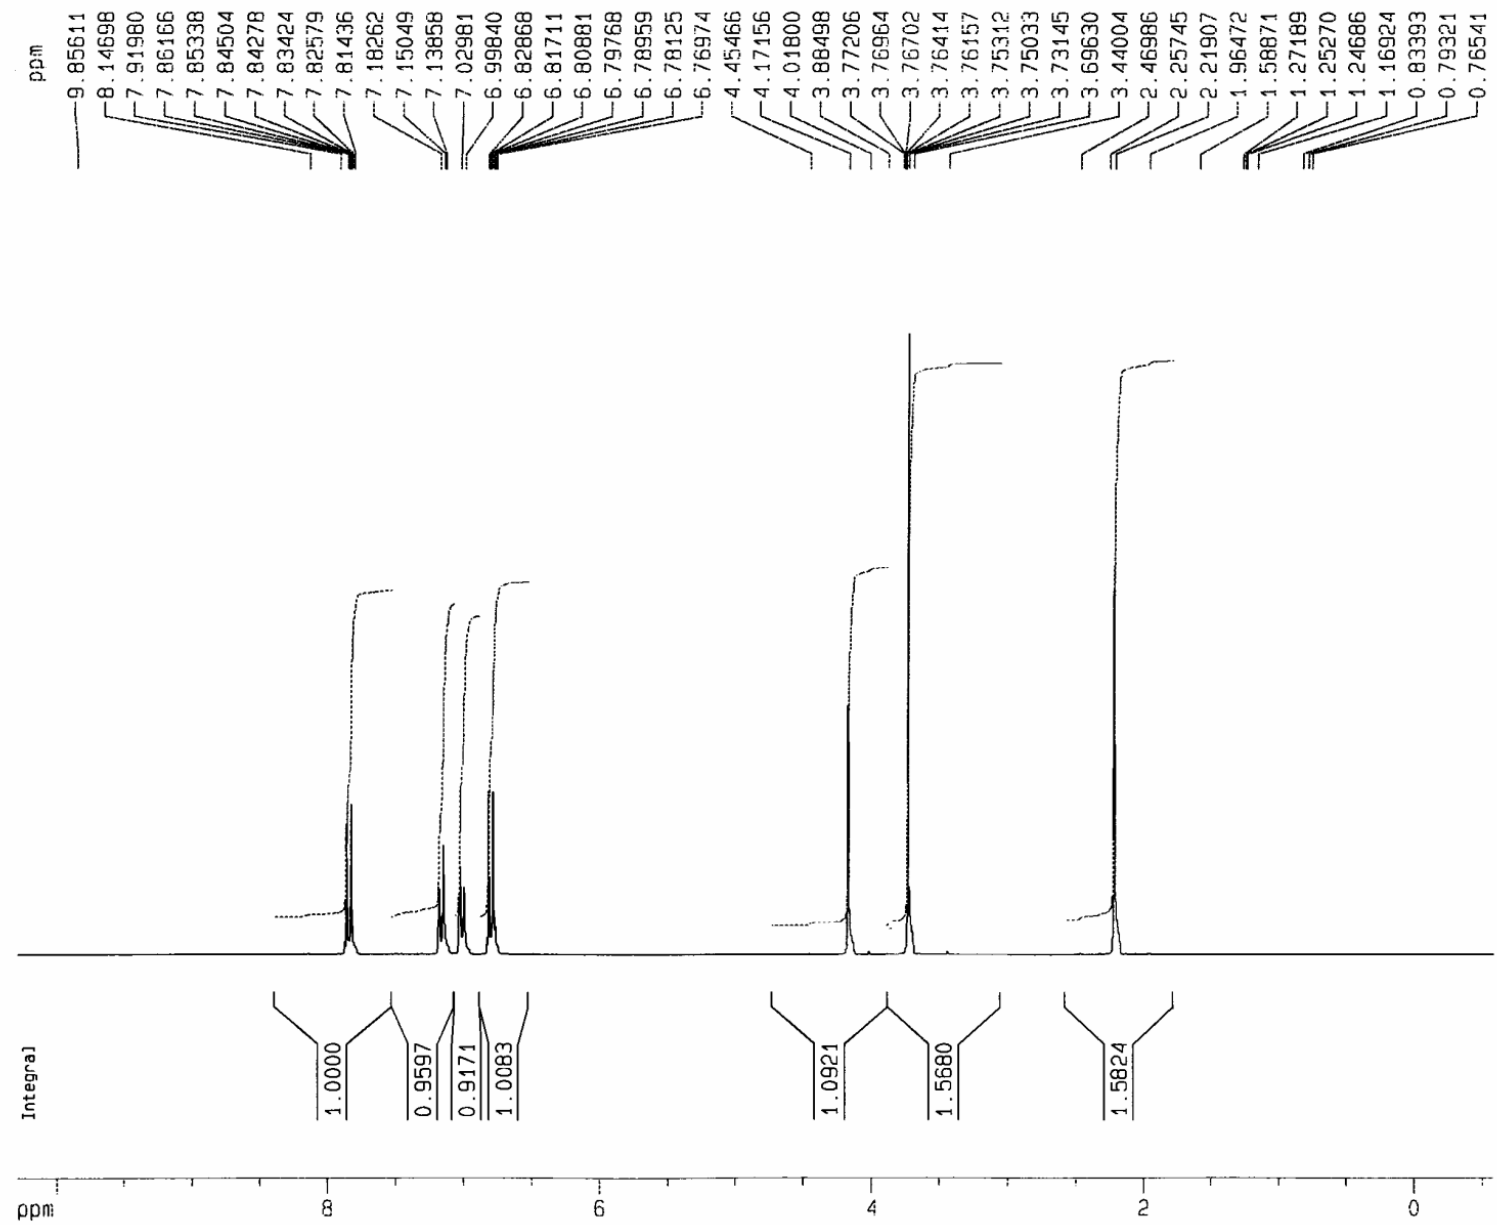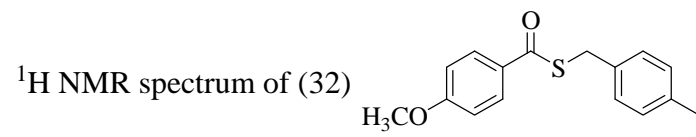



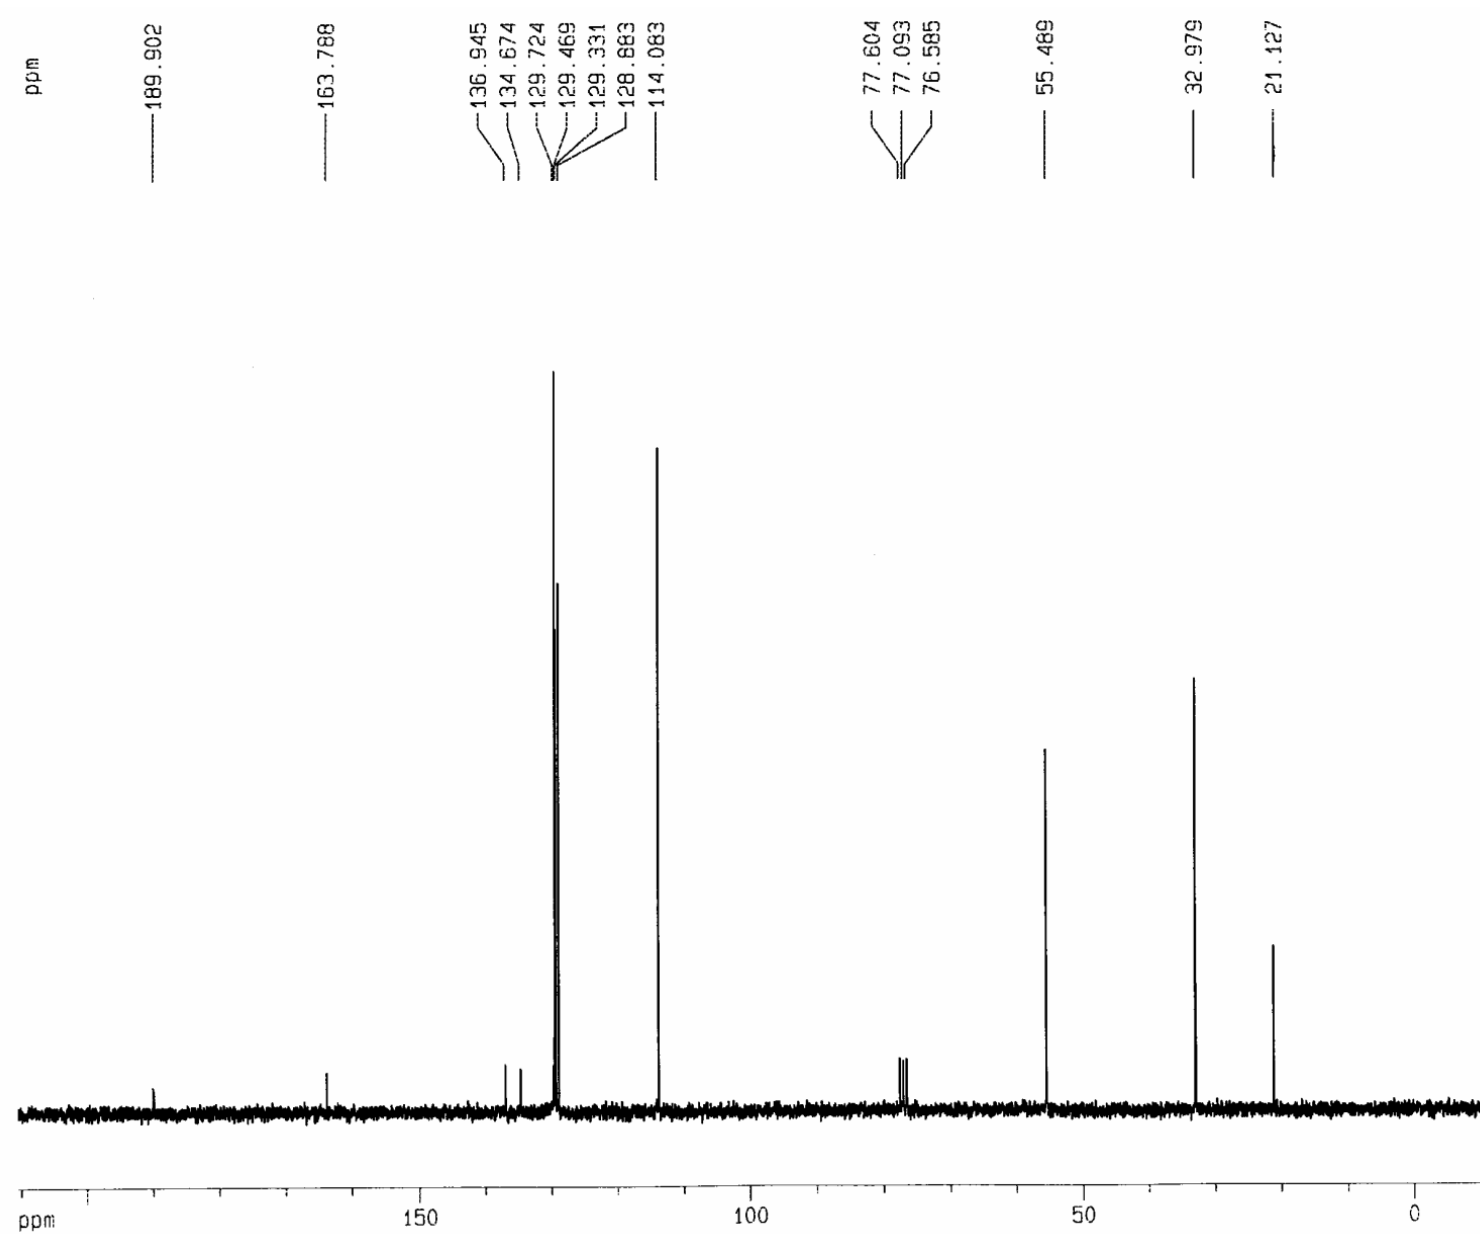

$^{13}\text{C}$  NMR spectrum of (32)

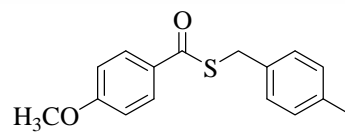

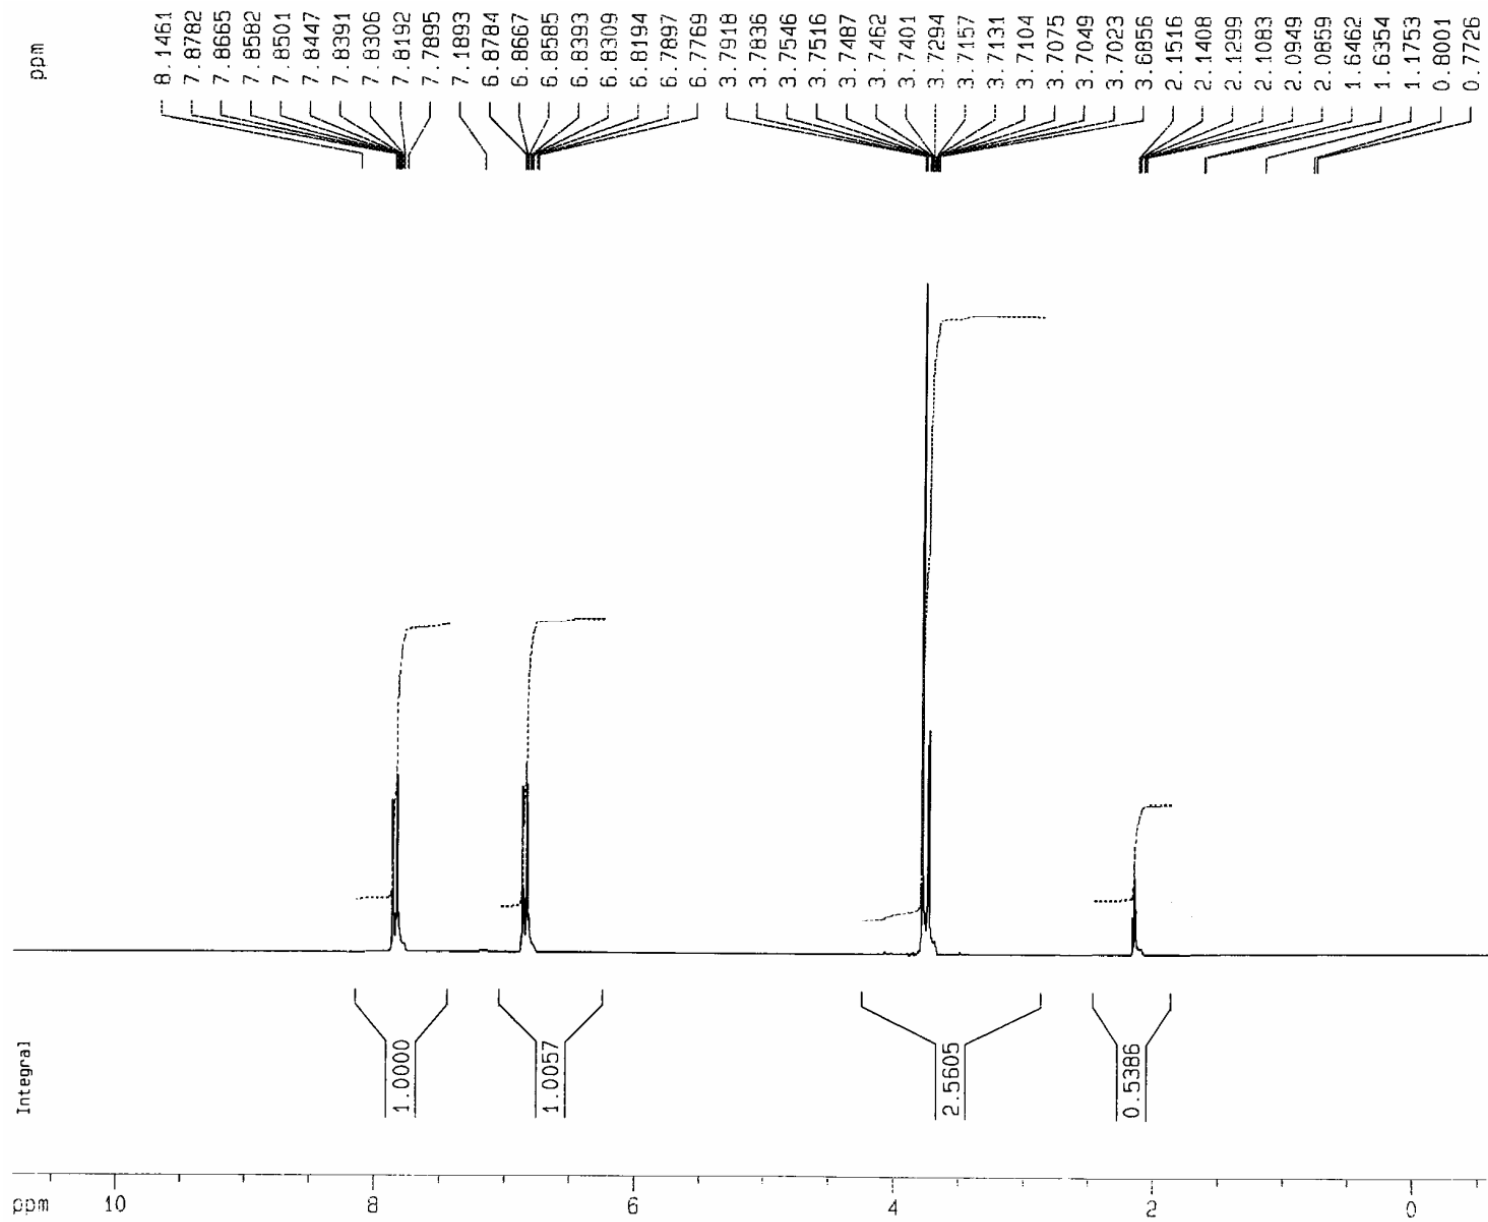

<sup>1</sup>H NMR spectrum of (33)

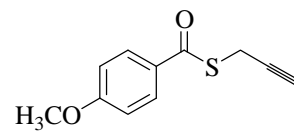

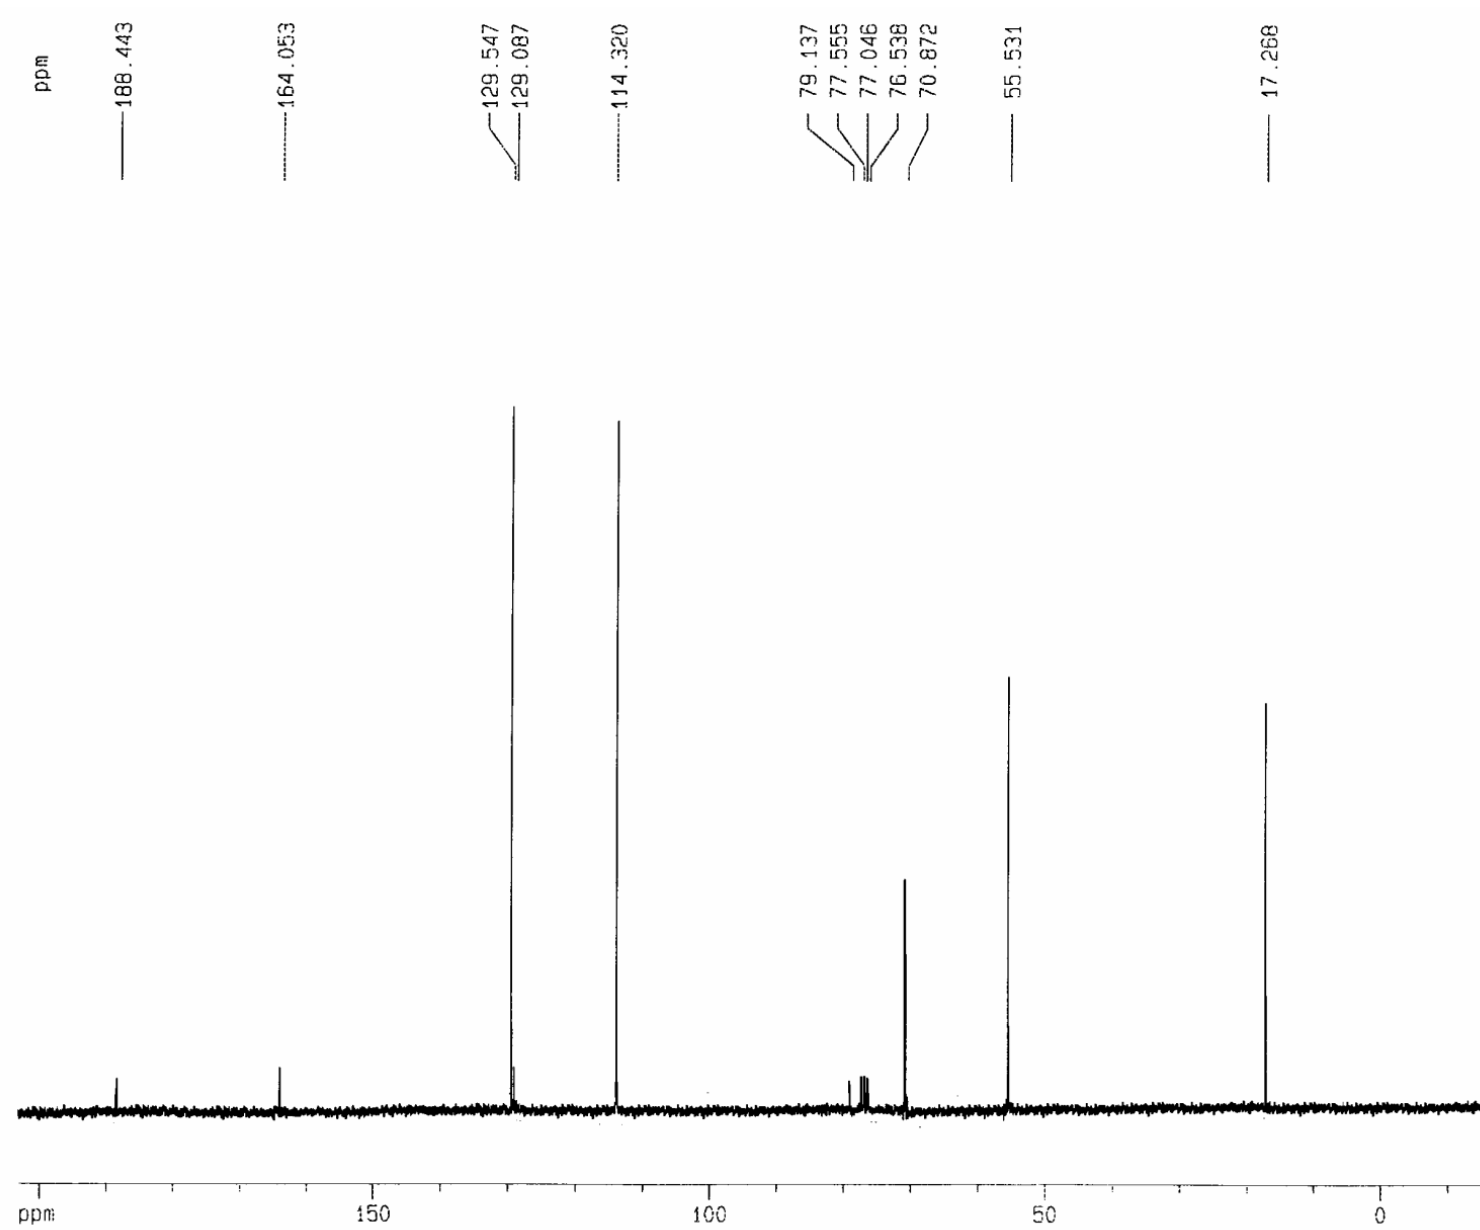

$^{13}\text{C}$  NMR spectrum of (33)

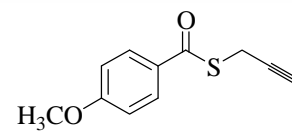

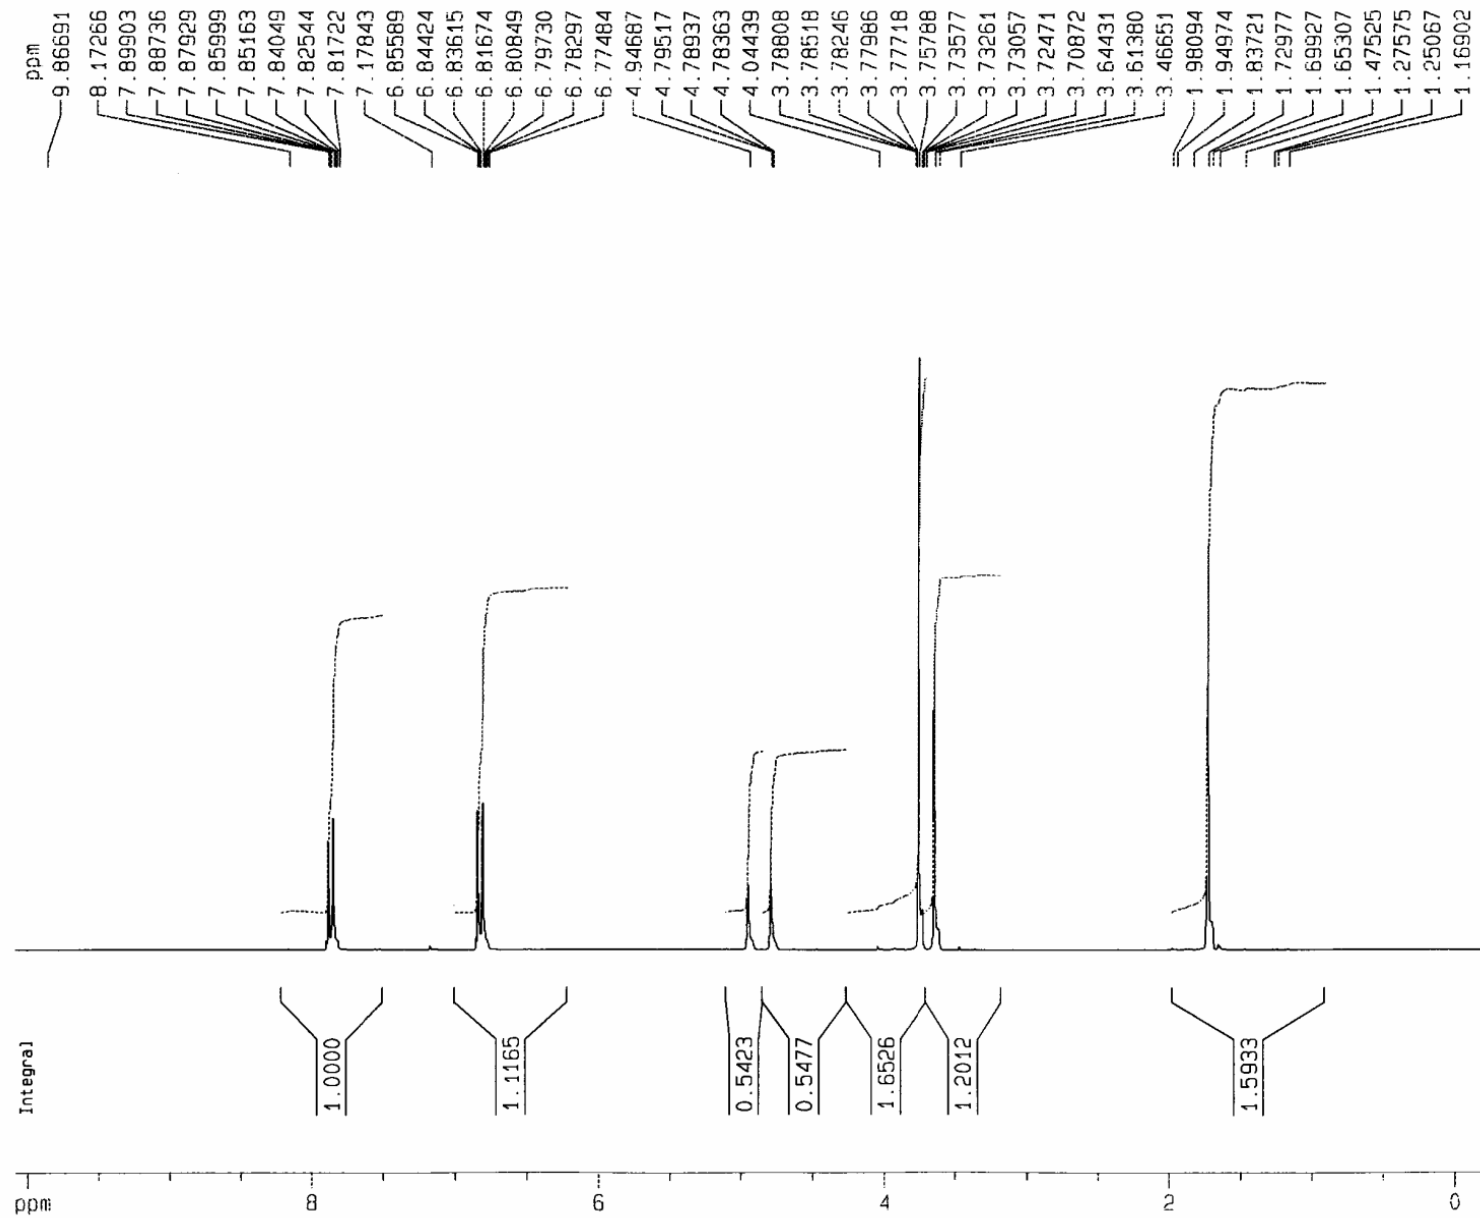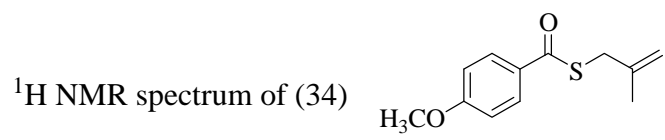

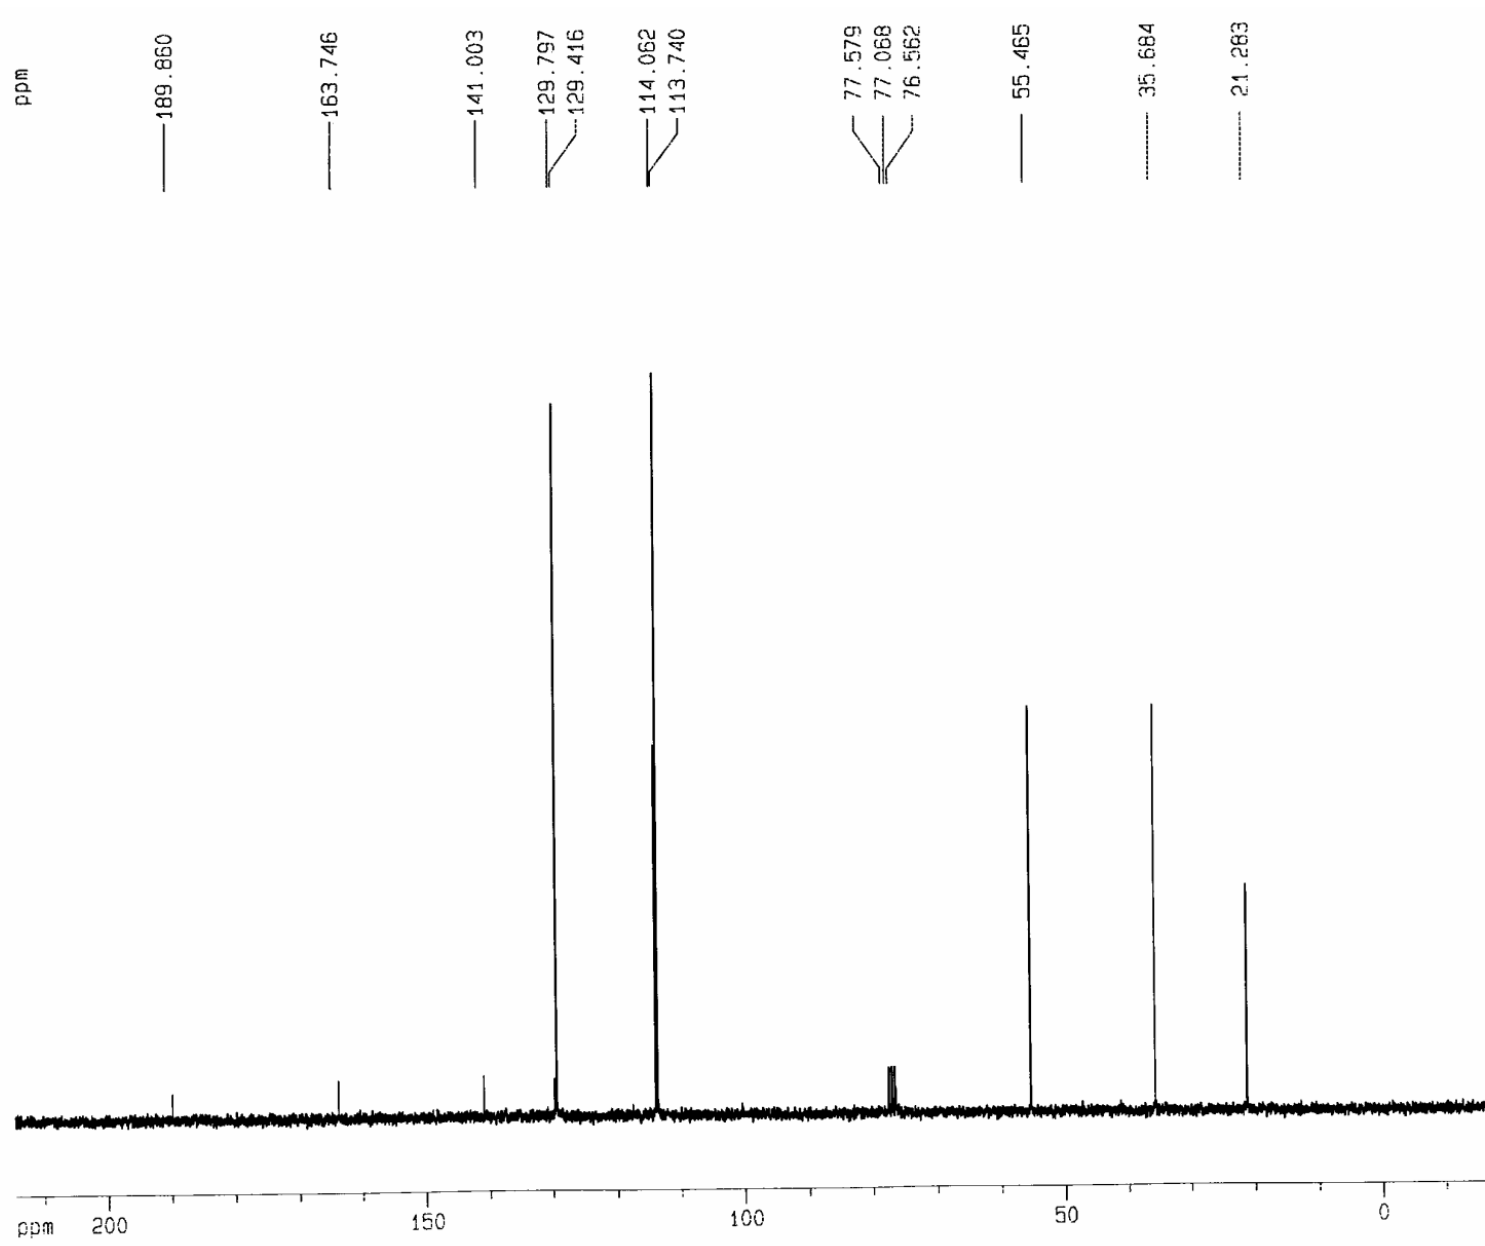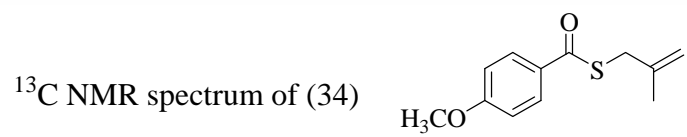

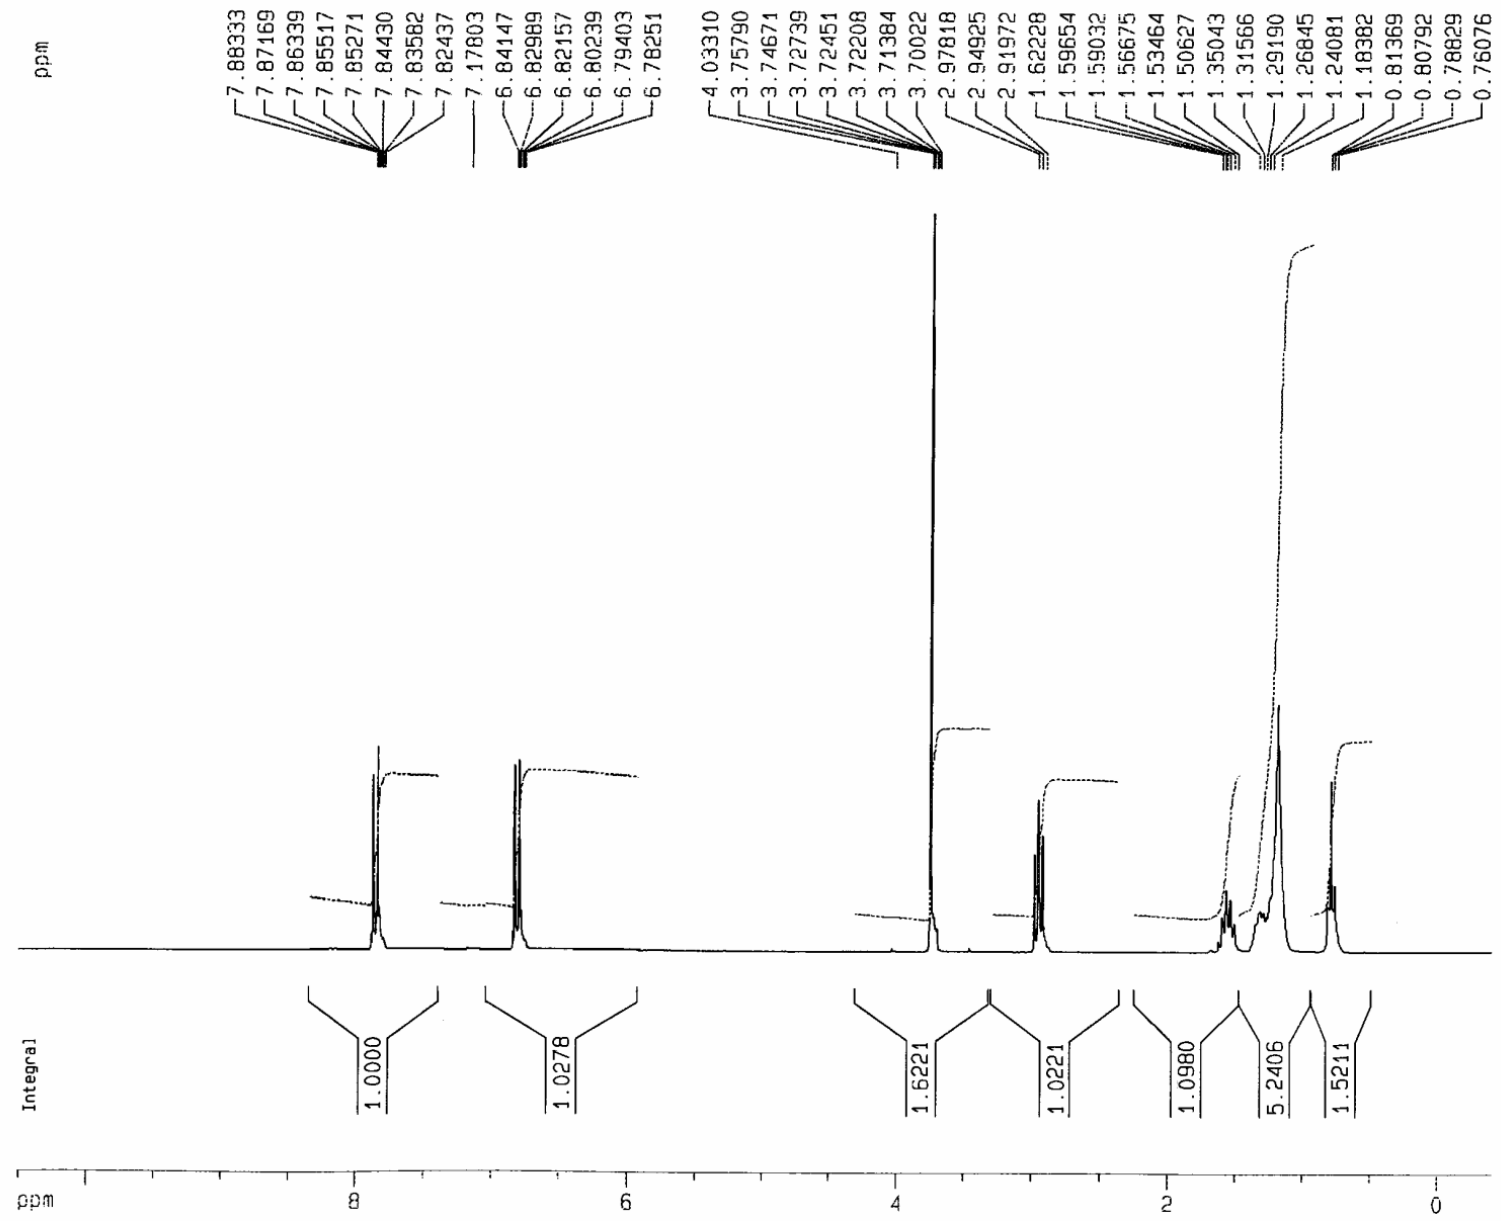

<sup>1</sup>H NMR spectrum of (35)

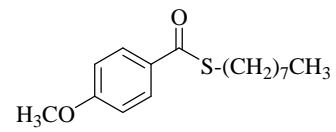

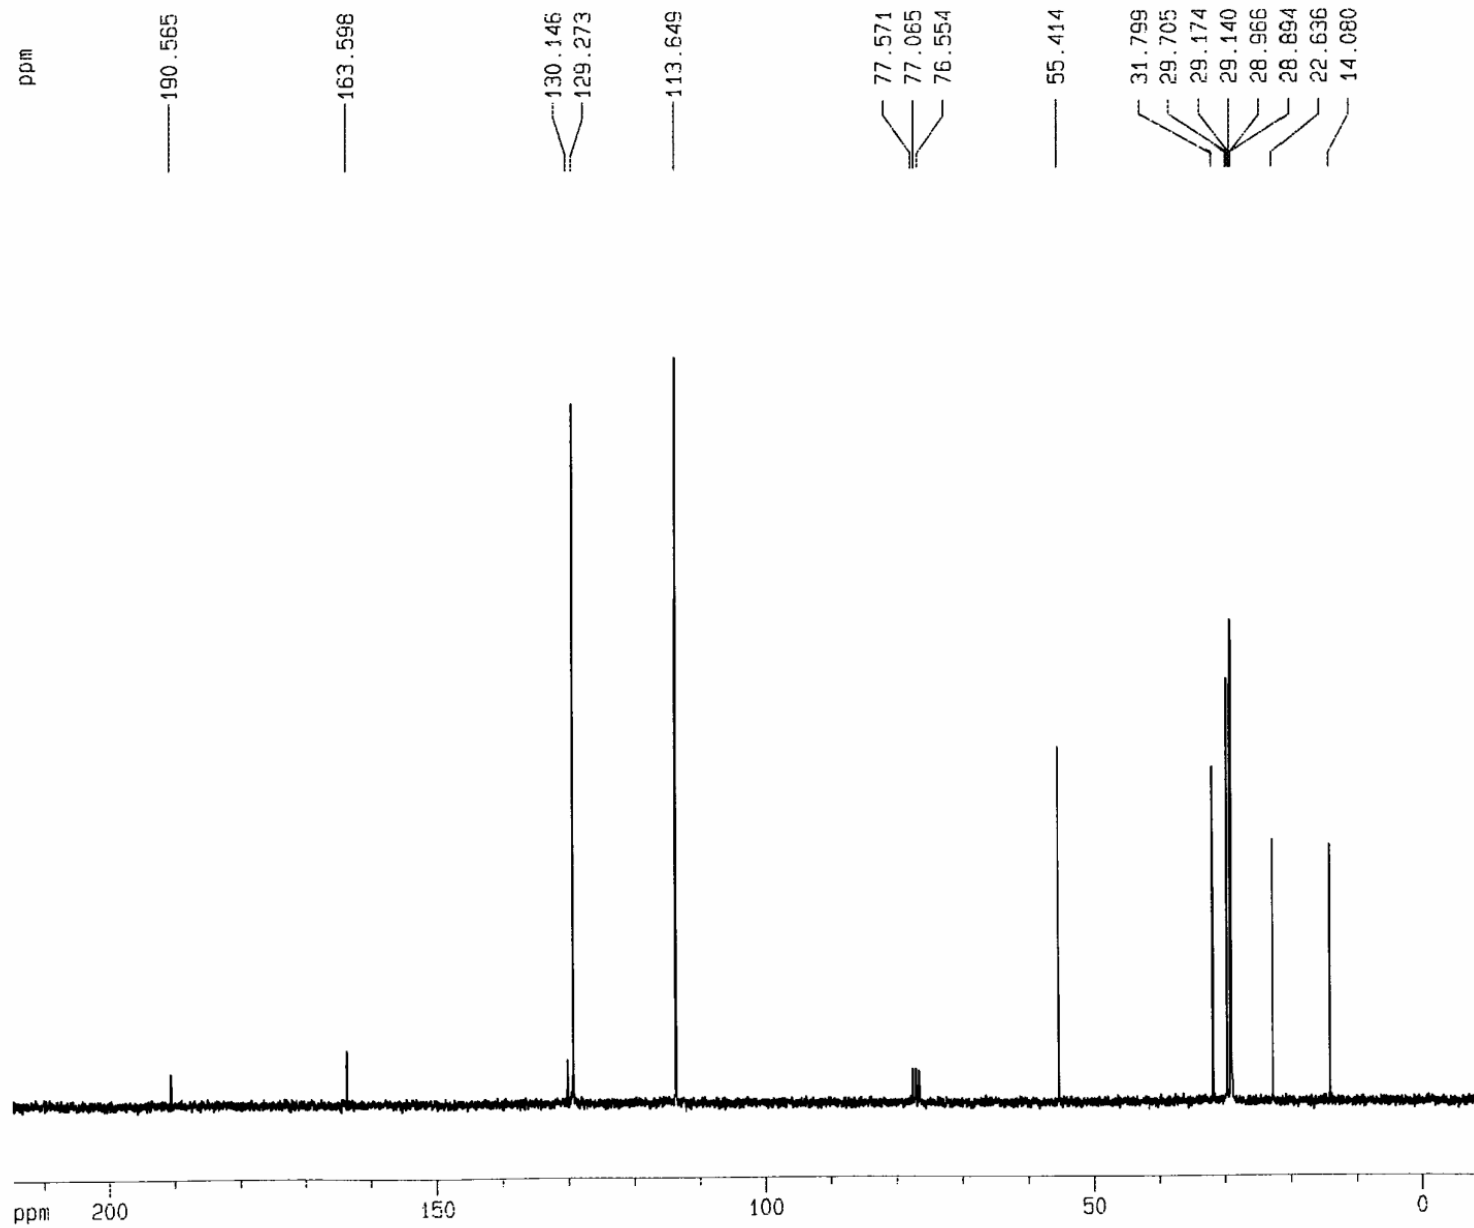

$^{13}\text{C}$  NMR spectrum of (35)

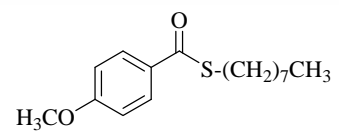

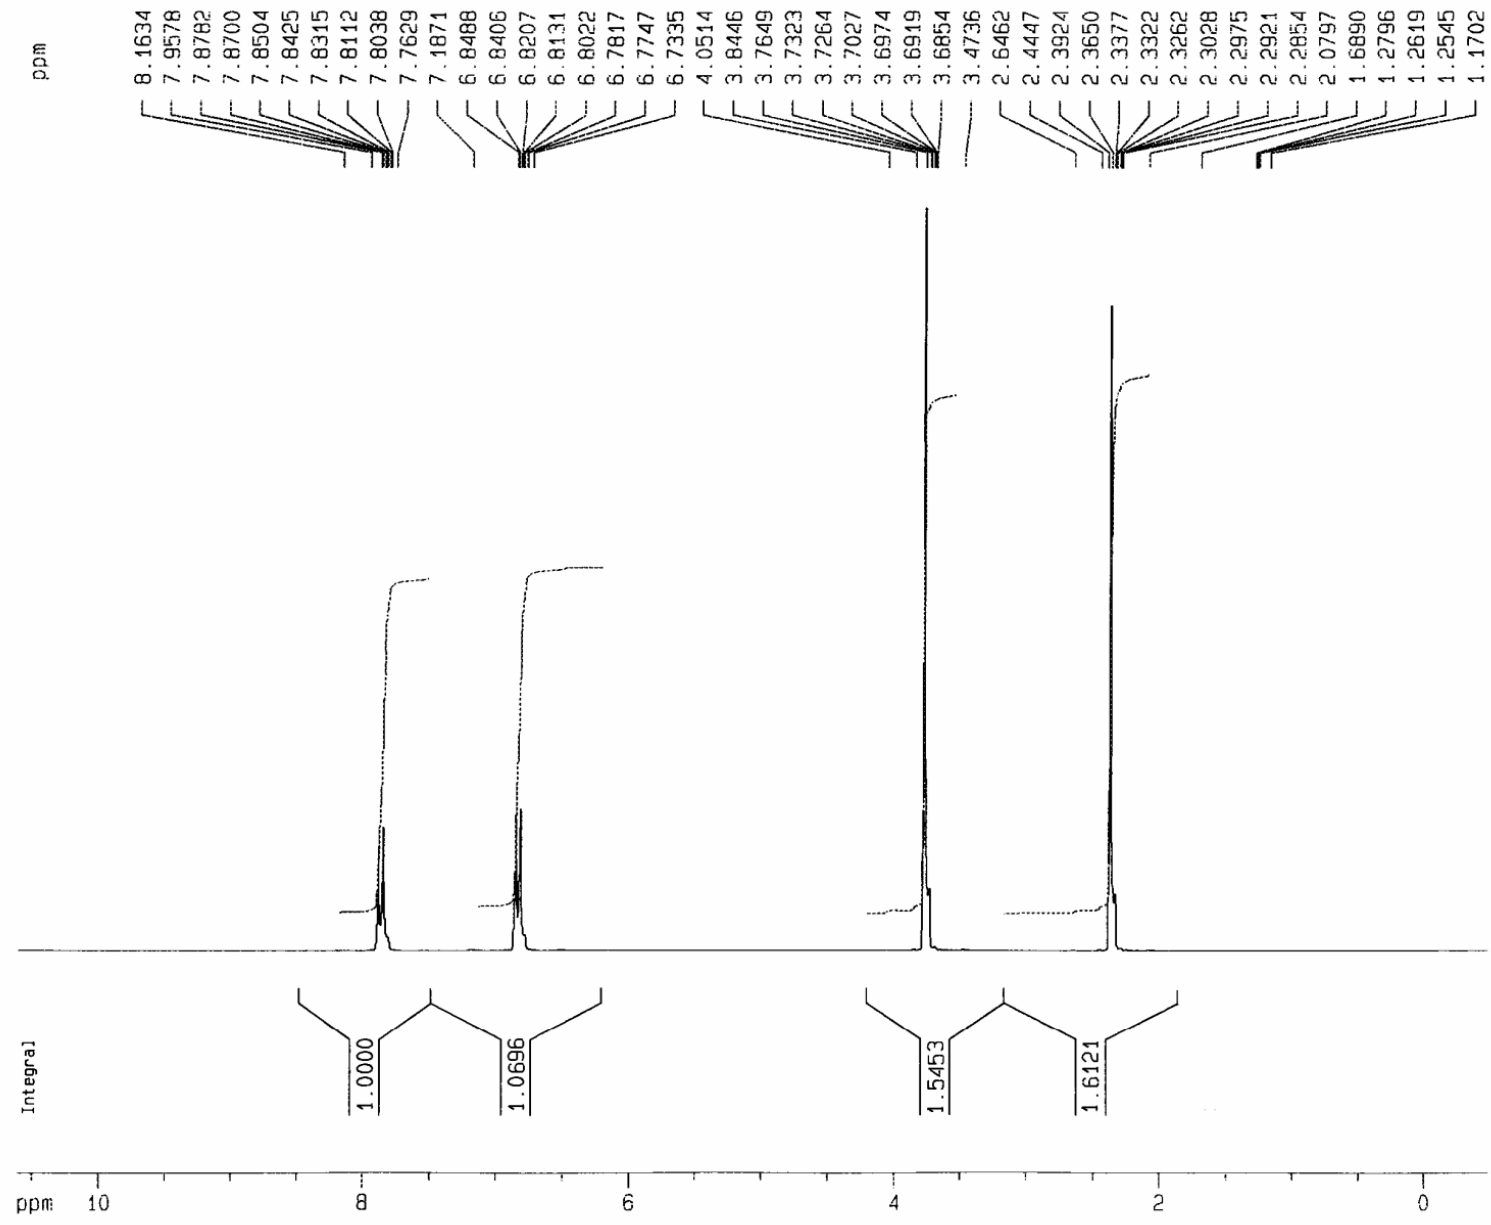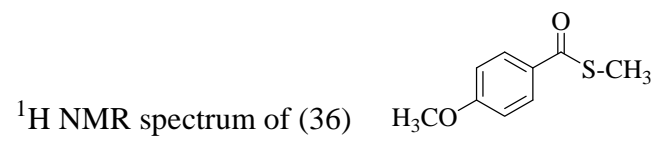



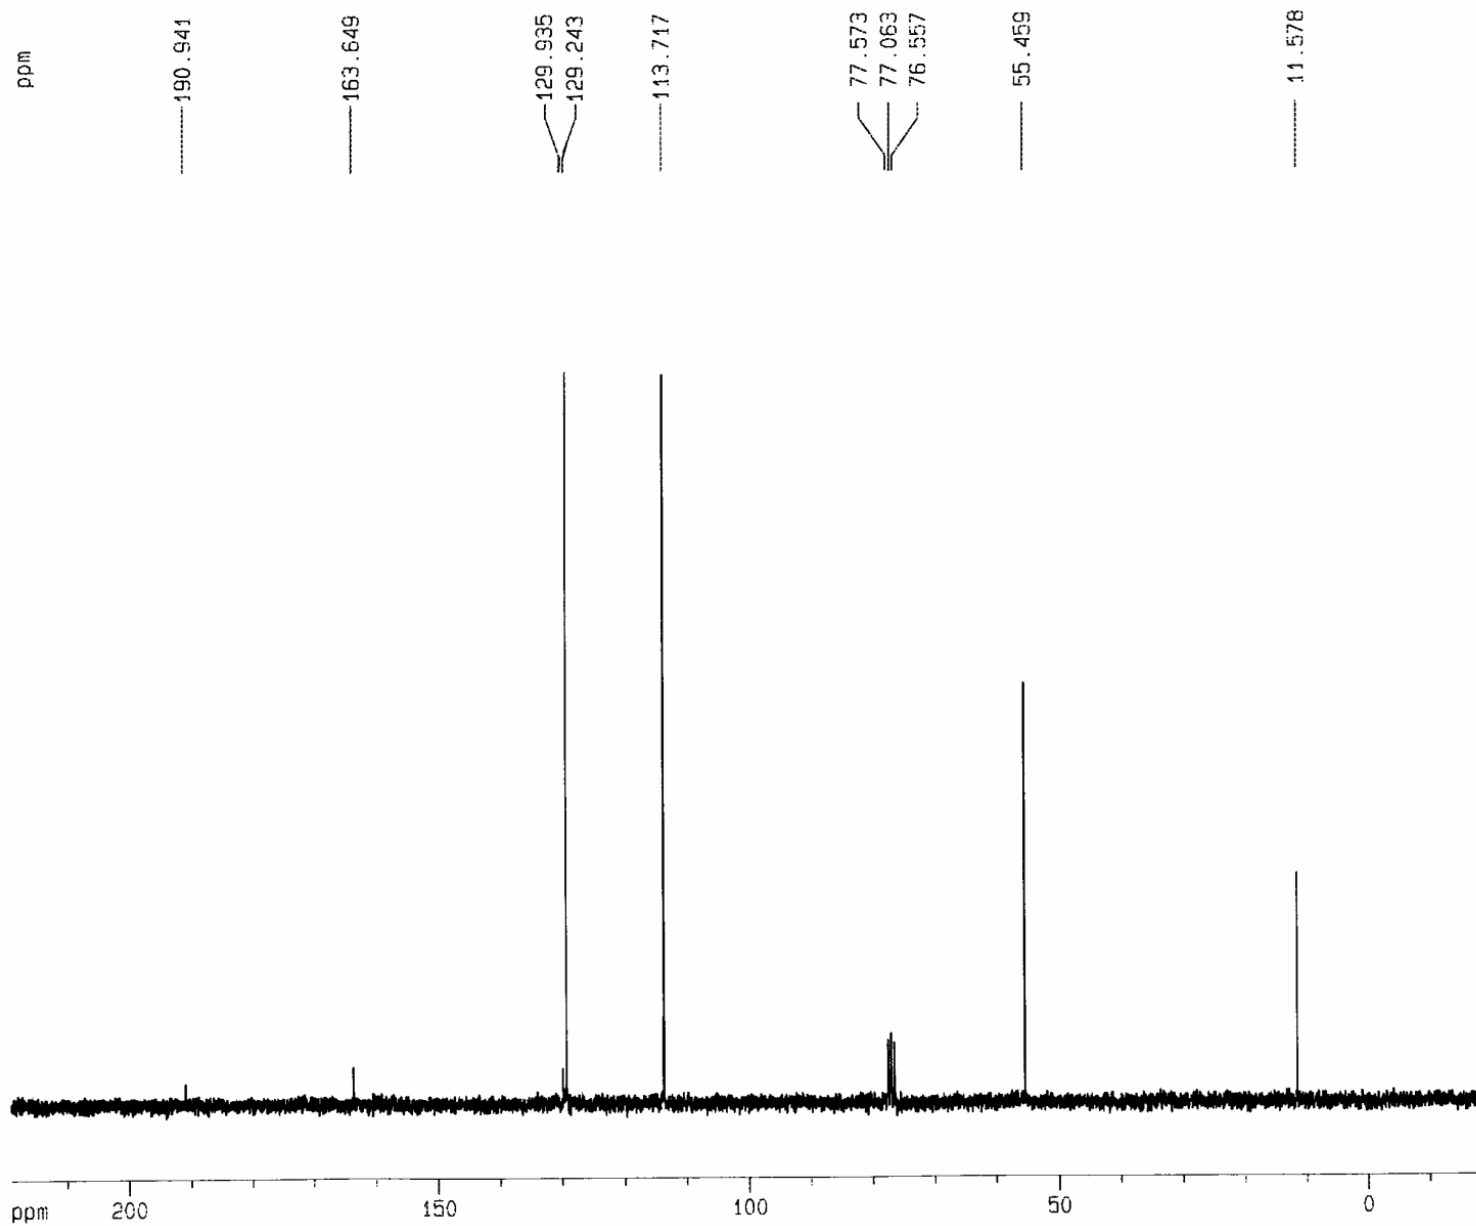

<sup>13</sup>C NMR spectrum of (36) COc1ccc(cc1)C(=O)S
